# Supplementary material for: Effects of Exogenous Ergothioneine on Brassica rapa Clubroot Development Revealed by Transcriptomic Analysis
Source: Int J Mol Sci. 2023 Mar 28;24(7):6380. doi: 10.3390/ijms24076380 (PMC10094275; doi:10.3390/ijms24076380)
Supplement: Supplementary file 1 [file ijms-24-06380-s001.zip]

Archive with 8 entries (8 files):
- expression.xls
- Figure S1. Effects of different concentrations of EGT on germination of resting spores of P. brassicae..pdf
- Table S1 rawdata_info.xls
- Table S2 mapSummary.xls
- Table S3 120 DEGs.xls
- Table S4 12 modules.xlsx
- Table S5 RNA-seq and qRT-PCR.xlsx
- Table S6 Primer sequence.xlsx
