# Supplementary material for: Effects of Exogenous Ergothioneine on Brassica rapa Clubroot Development Revealed by Transcriptomic Analysis
Source: Int J Mol Sci. 2023 Mar 28;24(7):6380. doi: 10.3390/ijms24076380 (PMC10094275; doi:10.3390/ijms24076380)
Supplement: Supplementary file 1 [file ijms-24-06380-s001.zip › Table S1 rawdata_info.xls]

Sample	Raw_Read_Number	Raw_Bases	Raw_Q30_number	Raw_N_rate	Raw_Q20_rate	Raw_Q30_rate
CK_0_1	43613802	6542070300	6153014294	0.000882	97.94	94.05
CK_0_2	41235310	6185296500	5836335232	0.000891	98.06	94.35
CK_0_3	45514754	6827213100	6388098809	0.00089	97.73	93.56
CK_10_1	42559250	6383887500	5992238887	0.000884	97.84	93.86
CK_10_2	47070150	7060522500	6627743109	0.00089	97.87	93.87
CK_10_3	44369594	6655439100	6279141897	0.001608	97.91	94.34
EGT_10_1	45085652	6762847800	6362369565	0.000732	97.88	94.07
EGT_10_2	43456408	6518461200	6062650176	0.276048	97.17	93
EGT_10_3	43487210	6523081500	6163288406	0.001484	97.97	94.48
EGT_14_1	51903672	7785550800	7213181010	0.224196	97	92.64
EGT_14_2	49139042	7370856300	6866664838	0.274662	97.24	93.15
EGT_14_3	43806956	6571043400	6124058998	0.276379	97.25	93.19
EGT_19_1	46165664	6924849600	6455599242	0.275849	97.27	93.22
EGT_19_2	45462720	6819408000	6390452169	0.239029	97.55	93.7
EGT_19_3	51230474	7684571100	7194957542	0.275204	97.47	93.62
EGT_27_1	54528914	8179337100	7635632260	0.258101	97.35	93.35
EGT_27_2	50433272	7564990800	7087610307	0.275153	97.43	93.68
EGT_27_3	50384668	7557700200	7142413463	0.000819	98.05	94.5
EPb_10_1	46734516	7010177400	6560919177	0.000711	97.65	93.59
EPb_10_2	45337192	6800578800	6349118512	0.265231	97.33	93.36
EPb_10_3	50460608	7569091200	7083430107	0.23744	97.48	93.58
EPb_14_1	46116900	6917535000	6480294567	0.00114	97.71	93.67
EPb_14_2	53889286	8083392900	7571312093	0.276347	97.46	93.66
EPb_14_3	44297062	6644559300	6229330314	0.20054	97.6	93.75
EPb_19_1	41696732	6254509800	5868793081	0.000687	97.74	93.83
EPb_19_2	48008154	7201223100	6692672711	0.27649	97.11	92.93
EPb_19_3	47453574	7118036100	6678639225	0.001142	97.74	93.82
EPb_27_1	42579934	6386990100	5966998197	0.275071	97.33	93.42
EPb_27_2	45386434	6807965100	6254627718	0.001144	96.92	91.87
EPb_27_3	45333088	6799963200	6394219090	0.000892	97.86	94.03
Pb4_10_1	40128814	6019322100	5632113906	0.274643	97.43	93.56
Pb4_10_2	46303444	6945516600	6517601849	0.276628	97.57	93.83
Pb4_10_3	42029924	6304488600	5878568332	0.274939	97.28	93.24
Pb4_14_1	46249264	6937389600	6476103001	0.275613	97.3	93.35
Pb4_14_2	50112998	7516949700	7018644875	0.274949	97.35	93.37
Pb4_14_3	44636590	6695488500	6246002828	0.275025	97.28	93.28
Pb4_19_1	51039710	7655956500	7167496975	0.273324	97.46	93.61
Pb4_19_2	52552118	7882817700	7340247940	0.277396	97.18	93.11
Pb4_19_3	40092210	6013831500	5566412008	0.00096	97.17	92.56
Pb4_27_1	46133712	6920056800	6451123904	0.275937	97.24	93.22
Pb4_27_2	47480996	7122149400	6640932863	0.276176	97.24	93.24
Pb4_27_3	39862594	5979389100	5620791615	0.00067	97.77	94
