# Supplementary material for: Effects of Exogenous Ergothioneine on Brassica rapa Clubroot Development Revealed by Transcriptomic Analysis
Source: Int J Mol Sci. 2023 Mar 28;24(7):6380. doi: 10.3390/ijms24076380 (PMC10094275; doi:10.3390/ijms24076380)
Supplement: Supplementary file 1 [file ijms-24-06380-s001.zip › Table S2 mapSummary.xls]

Sample	Clean_Reads	Total_Mapped	Multiple_Mapped	Uniquely_Mapped	Map_Events	Mapped_to_Gene	Mapped_to_InterGene	Mapped_to_Exon
CK_0_1	40237408	36698320 (91.20%)	969842 (2.64%)	35728478 (97.36%)	35728478	33361991 (93.38%)	2366487 (6.62%)	32832209 (98.41%)
CK_0_2	37681296	34108902 (90.52%)	876023 (2.57%)	33232879 (97.43%)	33232879	31042780 (93.41%)	2190099 (6.59%)	30605400 (98.59%)
CK_0_3	41564592	37331203 (89.81%)	956971 (2.56%)	36374232 (97.44%)	36374232	34131191 (93.83%)	2243041 (6.17%)	33684184 (98.69%)
CK_10_1	38620898	34547076 (89.45%)	933916 (2.70%)	33613160 (97.30%)	33613160	30981282 (92.17%)	2631878 (7.83%)	30334654 (97.91%)
CK_10_2	43115640	38523616 (89.35%)	1001005 (2.60%)	37522611 (97.40%)	37522611	34734328 (92.57%)	2788283 (7.43%)	34158774 (98.34%)
CK_10_3	40523524	36531255 (90.15%)	977586 (2.68%)	35553669 (97.32%)	35553669	32842877 (92.38%)	2710792 (7.62%)	32257296 (98.22%)
EGT_10_1	40902588	37074464 (90.64%)	982876 (2.65%)	36091588 (97.35%)	36091588	33500130 (92.82%)	2591458 (7.18%)	33010411 (98.54%)
EGT_10_2	40027972	35585034 (88.90%)	866810 (2.44%)	34718224 (97.56%)	34718224	32159806 (92.63%)	2558418 (7.37%)	31655695 (98.43%)
EGT_10_3	38921562	35143705 (90.29%)	875170 (2.49%)	34268535 (97.51%)	34268535	31842621 (92.92%)	2425914 (7.08%)	31355829 (98.47%)
EGT_14_1	43934234	39041949 (88.86%)	1018526 (2.61%)	38023423 (97.39%)	38023423	35048695 (92.18%)	2974728 (7.82%)	34488999 (98.40%)
EGT_14_2	45104372	40192699 (89.11%)	956596 (2.38%)	39236103 (97.62%)	39236103	36488822 (93.00%)	2747281 (7.00%)	35956406 (98.54%)
EGT_14_3	40427930	36001029 (89.05%)	867789 (2.41%)	35133240 (97.59%)	35133240	32581653 (92.74%)	2551587 (7.26%)	32074434 (98.44%)
EGT_19_1	43128962	36063666 (83.62%)	890025 (2.47%)	35173641 (97.53%)	35173641	32529504 (92.48%)	2644137 (7.52%)	31986180 (98.33%)
EGT_19_2	42191110	37656638 (89.25%)	921087 (2.45%)	36735551 (97.55%)	36735551	34007866 (92.57%)	2727685 (7.43%)	33477909 (98.44%)
EGT_19_3	46015030	40837621 (88.75%)	1015035 (2.49%)	39822586 (97.51%)	39822586	36705935 (92.17%)	3116651 (7.83%)	36098184 (98.34%)
EGT_27_1	50233732	44132710 (87.85%)	1087889 (2.47%)	43044821 (97.53%)	43044821	39788739 (92.44%)	3256082 (7.56%)	39074230 (98.20%)
EGT_27_2	43451106	38075648 (87.63%)	1049081 (2.76%)	37026567 (97.24%)	37026567	34131431 (92.18%)	2895136 (7.82%)	33459489 (98.03%)
EGT_27_3	45854604	41171710 (89.79%)	1023401 (2.49%)	40148309 (97.51%)	40148309	37397322 (93.15%)	2750987 (6.85%)	36793120 (98.38%)
EPb_10_1	43040600	38469137 (89.38%)	977398 (2.54%)	37491739 (97.46%)	37491739	34971248 (93.28%)	2520491 (6.72%)	34436703 (98.47%)
EPb_10_2	41714588	36739119 (88.07%)	893539 (2.43%)	35845580 (97.57%)	35845580	33281258 (92.85%)	2564322 (7.15%)	32733594 (98.35%)
EPb_10_3	46783170	41359719 (88.41%)	1025535 (2.48%)	40334184 (97.52%)	40334184	37453771 (92.86%)	2880413 (7.14%)	36831212 (98.34%)
EPb_14_1	42071748	37684783 (89.57%)	986933 (2.62%)	36697850 (97.38%)	36697850	34233498 (93.28%)	2464352 (6.72%)	33775151 (98.66%)
EPb_14_2	46320738	40120846 (86.62%)	1042241 (2.60%)	39078605 (97.40%)	39078605	36157598 (92.53%)	2921007 (7.47%)	35627054 (98.53%)
EPb_14_3	40828964	36203008 (88.67%)	884615 (2.44%)	35318393 (97.56%)	35318393	32786726 (92.83%)	2531667 (7.17%)	32287206 (98.48%)
EPb_19_1	38254304	32356887 (84.58%)	886585 (2.74%)	31470302 (97.26%)	31470302	29308173 (93.13%)	2162129 (6.87%)	28931370 (98.71%)
EPb_19_2	44410762	37541318 (84.53%)	958858 (2.55%)	36582460 (97.45%)	36582460	34107195 (93.23%)	2475265 (6.77%)	33667137 (98.71%)
EPb_19_3	43262800	37046117 (85.63%)	967592 (2.61%)	36078525 (97.39%)	36078525	33679565 (93.35%)	2398960 (6.65%)	33231377 (98.67%)
EPb_27_1	39160844	29050384 (74.18%)	767290 (2.64%)	28283094 (97.36%)	28283094	26238591 (92.77%)	2044503 (7.23%)	25865065 (98.58%)
EPb_27_2	41168276	33423855 (81.19%)	872445 (2.61%)	32551410 (97.39%)	32551410	30276108 (93.01%)	2275302 (6.99%)	29831332 (98.53%)
EPb_27_3	41534806	32628622 (78.56%)	986571 (3.02%)	31642051 (96.98%)	31642051	29341574 (92.73%)	2300477 (7.27%)	28933242 (98.61%)
Pb4_10_1	36775080	32732464 (89.01%)	775231 (2.37%)	31957233 (97.63%)	31957233	29691499 (92.91%)	2265734 (7.09%)	29246145 (98.50%)
Pb4_10_2	42098346	37558326 (89.22%)	950339 (2.53%)	36607987 (97.47%)	36607987	33786476 (92.29%)	2821511 (7.71%)	33252955 (98.42%)
Pb4_10_3	38816744	34045666 (87.71%)	863686 (2.54%)	33181980 (97.46%)	33181980	30844430 (92.96%)	2337550 (7.04%)	30403169 (98.57%)
Pb4_14_1	42472092	35452796 (83.47%)	1003523 (2.83%)	34449273 (97.17%)	34449273	32278209 (93.70%)	2171064 (6.30%)	31942013 (98.96%)
Pb4_14_2	46144186	40241102 (87.21%)	982187 (2.44%)	39258915 (97.56%)	39258915	36636831 (93.32%)	2622084 (6.68%)	36156696 (98.69%)
Pb4_14_3	41196706	35191705 (85.42%)	944323 (2.68%)	34247382 (97.32%)	34247382	31980837 (93.38%)	2266545 (6.62%)	31573912 (98.73%)
Pb4_19_1	45415390	38667999 (85.14%)	1019435 (2.64%)	37648564 (97.36%)	37648564	34727662 (92.24%)	2920902 (7.76%)	34203547 (98.49%)
Pb4_19_2	48331838	38129914 (78.89%)	1113064 (2.92%)	37016850 (97.08%)	37016850	34430666 (93.01%)	2586184 (6.99%)	34011843 (98.78%)
Pb4_19_3	36437590	30231598 (82.97%)	867022 (2.87%)	29364576 (97.13%)	29364576	27378688 (93.24%)	1985888 (6.76%)	27027883 (98.72%)
Pb4_27_1	43423776	30921275 (71.21%)	844292 (2.73%)	30076983 (97.27%)	30076983	27906754 (92.78%)	2170229 (7.22%)	27514259 (98.59%)
Pb4_27_2	44369688	32227300 (72.63%)	929311 (2.88%)	31297989 (97.12%)	31297989	28979857 (92.59%)	2318132 (7.41%)	28594838 (98.67%)
Pb4_27_3	36505436	25474103 (69.78%)	777625 (3.05%)	24696478 (96.95%)	24696478	22941373 (92.89%)	1755105 (7.11%)	22652511 (98.74%)
