# Supplementary material for: Effects of Exogenous Ergothioneine on Brassica rapa Clubroot Development Revealed by Transcriptomic Analysis
Source: Int J Mol Sci. 2023 Mar 28;24(7):6380. doi: 10.3390/ijms24076380 (PMC10094275; doi:10.3390/ijms24076380)
Supplement: Supplementary file 1 [file ijms-24-06380-s001.zip › Table S3 120 DEGs.xls]

Gene_ID	CK_0_1:fpkm	CK_0_2:fpkm	CK_0_3:fpkm	CK_10_1:fpkm	CK_10_2:fpkm	CK_10_3:fpkm	EGT_10_1:fpkm	EGT_10_2:fpkm	EGT_10_3:fpkm	EGT_14_1:fpkm	EGT_14_2:fpkm	EGT_14_3:fpkm	EGT_19_1:fpkm	EGT_19_2:fpkm	EGT_19_3:fpkm	EGT_27_1:fpkm	EGT_27_2:fpkm	EGT_27_3:fpkm	EPb_10_1:fpkm	EPb_10_2:fpkm	EPb_10_3:fpkm	EPb_14_1:fpkm	EPb_14_2:fpkm	EPb_14_3:fpkm	EPb_19_1:fpkm	EPb_19_2:fpkm	EPb_19_3:fpkm	EPb_27_1:fpkm	EPb_27_2:fpkm	EPb_27_3:fpkm	Pb4_10_1:fpkm	Pb4_10_2:fpkm	Pb4_10_3:fpkm	Pb4_14_1:fpkm	Pb4_14_2:fpkm	Pb4_14_3:fpkm	Pb4_19_1:fpkm	Pb4_19_2:fpkm	Pb4_19_3:fpkm	Pb4_27_1:fpkm	Pb4_27_2:fpkm	Pb4_27_3:fpkm	Chromosome	Start Site	End Site	Direction	Length	Name	GO
Bra000342	9.393336615	32.95234606	38.10526572	68.42234776	91.63873762	58.73885508	39.22017211	37.62350881	21.95490071	76.91648205	94.81959542	54.5890153	35.23740088	36.17792709	70.98941484	118.1636936	111.0674204	37.33801188	9.565428822	21.19413467	21.10722075	42.2342573	51.82066416	90.13671909	57.76895966	46.63980313	56.31323246	35.73299495	26.22493715	31.56057458	18.31140712	31.93060694	16.07232087	23.66091456	40.42226219	24.55920246	72.66391893	35.32190007	22.31358455	46.06800826	20.44846962	27.48939665	A03	10664903	10666108	+	1206	Bra000342	-
Bra000918	7.581510796	5.956059295	14.52760029	37.60189173	28.34091145	27.08916563	21.10397624	9.033714579	10.27469459	7.21819535	11.03626596	13.08422182	20.23763238	19.05521538	18.31914899	35.50533649	19.60050711	17.1940783	6.22135591	6.722903799	9.376239451	11.59277109	14.18584065	10.34801266	10.72944045	12.3158074	15.40018466	6.632819734	6.529687884	13.47841502	10.99808341	7.934701116	14.55413703	2.74217403	3.788647138	7.493269903	13.77579222	3.951771935	4.956549171	9.009316649	7.706200121	6.63278946	A03	13924541	13925812	+	726	Bra000918	-
Bra001084	32.46194829	40.24979518	36.29871675	21.20586795	17.49229465	27.08861558	18.18286852	26.4388079	39.47775129	55.71080403	47.1555921	66.71281706	23.18202135	15.77822076	6.930260068	3.517312281	5.283088914	9.206716995	57.1432682	68.91249417	32.89757549	83.31688008	78.26293259	81.65931733	14.67978595	21.33348881	11.96271134	7.221293383	13.10269045	5.329700055	45.88345106	69.18586613	27.64464978	13.03999671	49.91271417	49.26587977	19.70029545	7.122416649	17.94720428	3.800008068	3.40807827	1.90543097	A03	14665784	14667975	-	972	Bra001084	GO:0004601;GO:0006979;GO:0020037;GO:0055114
Bra001250	2.769319742	6.123020461	2.850587015	1.841260724	4.047652628	2.142616825	7.063848203	5.612685631	3.302665169	3.410719627	3.55625152	4.686707216	5.736846377	4.146427246	4.890139131	4.84113586	2.412643246	3.349332371	4.140834038	4.905803156	4.980811535	3.230397775	3.094627497	2.303211514	8.555526741	6.300681063	6.928108715	7.499035436	5.480452254	5.457817845	3.074077367	3.244481153	4.485610241	8.36597453	4.908137594	6.134981306	6.938779957	10.09502609	5.098145127	5.17933792	5.308737305	7.716995429	A03	15545344	15547924	-	1872	Bra001250	GO:0000166;GO:0004812;GO:0005524;GO:0005737;GO:0006412;GO:0006418
Bra001940	18.51039862	12.78522906	31.87359282	3.379254975	20.14617676	10.37447051	17.76350063	31.11836581	36.51876459	19.69856876	37.13078854	37.78740977	19.93182198	10.47678188	11.57133921	3.724213004	0.433259291	1.237385129	12.65183303	16.81989654	15.0618385	35.01356029	17.70249862	29.78163338	11.2156485	13.63297269	11.76662849	2.343356979	1.337795705	0.705401478	15.112061	37.66555076	15.0437567	2.416492857	16.43384121	10.39410367	19.04653625	2.227473933	2.629488271	1.401053395	0.41240611	0	A03	19495060	19496562	-	1428	Bra001940	GO:0006810;GO:0008519;GO:0016020;GO:0055085
Bra001986	18.11378951	19.35347649	31.85064328	12.71790049	22.47164349	13.76595447	38.05148419	35.84672097	17.04706255	13.57488267	14.51240393	11.96243953	29.28255329	27.88680528	23.95918648	15.30173052	2.334695351	8.125721621	7.549593717	23.83059098	8.514483708	17.51364458	9.078045823	24.99425646	14.11735287	14.02537485	26.18501838	3.84987778	1.483323447	1.508405676	11.61189224	16.08040844	14.37652188	6.399555829	6.809222495	2.604811659	21.22262329	10.59100813	7.87192715	4.436330174	1.234624581	1.067760374	A07	2837379	2838892	+	954	Bra001986	GO:0004601;GO:0006979;GO:0020037;GO:0055114
Bra002064	0.676705102	0.649315736	1.781735857	0.3836216	1.474091173	1.512028158	1.379749983	2.793123226	2.617776268	1.441339796	3.08176591	3.193693265	2.199857926	1.672058119	1.377686219	0.603974444	0.413151431	0.729543454	1.392597873	1.715430334	1.368796001	2.810134161	2.181753873	1.999449061	1.053307526	1.623267715	0.995484391	0.454187028	0.748100189	0.360355346	1.881396933	2.717852549	1.518667374	0.55392831	0.91186989	0.822238071	1.425314061	0.590026484	1.088303785	0.813607737	0.204826073	0.566857761	A07	2155970	2157766	-	1797	Bra002064	GO:0004672;GO:0004674;GO:0005488;GO:0005524;GO:0006468
Bra002474	7.293257574	4.309733271	5.012665626	0.106878762	1.766916315	0.351048398	3.351221008	6.48480935	1.146081584	2.007819856	1.461437134	1.789782927	3.830566564	2.668893156	0.357050966	0.54687779	0.047960796	0.751156824	0.662412125	2.041146007	1.418987655	2.609721492	2.540255186	3.038486226	0.507905266	0.442418415	1.634363783	0.949039639	0.219393887	0.278879654	0.780672671	2.766715551	0.922158012	1.234616028	1.814651375	0.676825355	1.560032284	0.483482714	0.545771693	0.238605158	0.057065497	0.143572008	A10	9384584	9386001	-	1290	Bra002474	-
Bra003845	2.90197067	4.984229908	2.735366064	1.001207531	1.134740178	0.458329471	3.828440577	3.532257046	0.856986905	2.005686147	1.690417621	1.635720847	3.33746423	2.416984296	2.814479851	1.557079492	0.262994375	0.605733765	1.297269837	2.729922344	2.066843735	1.74464201	2.114308343	2.105844244	7.091722484	6.514296419	5.816299285	3.816329429	3.709412046	2.880077023	1.325022083	1.109017737	2.131737407	6.064838035	2.653517845	4.211001207	4.709284973	9.500101363	4.655395812	1.880822272	2.764128943	3.181927977	A07	18613105	18616758	+	2823	Bra003845	GO:0005985;GO:0009058
Bra004467	4.951448478	6.293317394	3.177974508	1.810660975	3.383180197	2.131724512	4.523696485	4.250616008	6.065515127	4.28603379	5.204930338	5.386931585	5.191570156	5.141738417	2.722002081	1.865917608	1.122749866	1.742106506	2.39016082	3.95633409	2.731754529	6.758328421	10.50727739	6.489068961	12.30712187	10.38718435	11.01425241	3.663818739	2.230085423	3.539134636	5.599401094	5.472096886	4.511315744	31.94436314	12.07341116	18.15359873	6.05753614	16.85816948	13.78503575	4.556743199	15.85488791	6.987308182	A05	290873	294758	-	2094	Bra004467	GO:0003824;GO:0008152
Bra004502	6.19374738	6.43137644	7.232717393	0.105893704	1.230173396	0.695625858	2.83204974	3.495222588	1.445205516	1.38789391	2.805437356	1.92528328	3.947072275	2.403904602	2.653201302	1.500472915	0.095037522	0.437784541	0.468790674	2.36761007	1.230170749	1.628013663	1.707857543	2.910132353	0.559137902	0.974090725	2.846043343	0.125372364	0	0	1.104967901	1.731294233	0.644935666	0.611618539	0.809066915	0.206334564	2.62292818	0.862247974	0.36049436	0	0	0	A05	468827	470362	-	651	Bra004502	GO:0000287;GO:0004427;GO:0005737;GO:0006796
Bra004717	4.427815213	4.892328629	3.948426853	2.890431929	5.553337185	1.49187684	10.39585207	7.435914722	4.508314062	6.18762094	2.964235697	4.010528859	8.425640332	5.511745043	6.517864331	8.077493433	1.686168865	3.106893561	5.886123915	9.020619183	7.914872179	3.267471004	3.189583668	3.013006258	15.41462314	11.03418116	11.3847906	11.80629186	12.01491992	8.145390651	3.166879702	2.231566885	5.1344721	10.99054153	3.926038195	8.588838443	10.99485303	16.73640791	8.855918044	5.8075595	9.259684356	8.542082991	A05	1501743	1502587	+	477	Bra004717	-
Bra004807	10.02202741	23.88975603	30.22199373	11.11539125	19.0540435	10.98279988	7.589529929	5.862267653	3.177771664	26.00827116	48.958144	26.23310405	5.056347864	13.39299111	18.12033652	14.34502511	9.40031601	2.651141733	3.737896992	4.629916552	2.83797531	36.14947548	36.3347215	65.68194392	21.16271942	21.23608393	38.48183817	6.516738852	4.442726203	4.908281912	1.115246673	3.446259721	4.339567117	18.10770175	19.00847315	5.206348885	29.40424486	6.333623554	8.004651503	5.249313471	3.19566781	5.025020279	A05	1908181	1909470	+	1290	Bra004807	-
Bra004821	27.76072627	43.19978017	66.2244376	101.4070341	73.14594557	85.9227554	159.7263316	185.666939	226.7199815	174.4683216	160.3368437	222.5508519	132.4535368	162.7150767	120.0958111	42.13284454	30.35829017	55.8194324	138.8170716	139.744753	106.0563823	136.8843048	156.4682804	162.5071135	50.71866976	71.48767125	20.23805634	36.92216118	20.50855896	11.39595804	303.6692003	282.1570503	218.6191704	38.6073123	91.47928089	79.95464359	34.53182698	25.37383349	24.94203005	3.027025061	21.56614995	5.94352443	A05	1965165	1969541	+	966	Bra004821	-
Bra005045	3.846040361	4.089282572	5.836249431	2.93875425	10.06155569	8.938095574	13.32226533	19.48920022	27.95771225	7.115540322	8.47250727	12.16327495	9.475094284	11.31709394	6.683014805	2.815088588	0.730866367	1.78581016	10.50192237	6.893825082	14.07303964	20.90919642	10.48910675	10.20007497	6.767722455	7.621321852	10.43483699	0.79647189	0.254381972	0.295638216	3.435956428	18.39540878	6.181710015	1.227006685	8.716757569	4.242893567	24.39949639	0.928972179	1.205350941	0.513791538	0.075618378	0.760998008	A05	3139277	3141223	+	1947	Bra005045	GO:0000145;GO:0006887
Bra005563	0.354091598	0.569597451	0.238789715	0.071511205	0.106506394	0.17895769	0.417675672	0.254548948	0.441507287	0.374904122	0.325942929	0.707107481	0.387295181	0.216451161	0.19908184	0.131351911	0.149753108	0.098546935	0.379895513	0.732817069	0.49449291	0.754501085	0.849826035	0.564725569	0.302073671	0.21927146	0.220915512	0.169330724	0.146793627	0.04975861	0.298478881	0.324767331	0.653298421	0.229462695	0.445191961	0.185786724	0.253041826	0.237227514	0.189346795	0.02660794	0.381817897	0.064041456	A05	6241335	6244313	-	2892	Bra005563	GO:0004672;GO:0004674;GO:0005515;GO:0005524;GO:0006468
Bra005729	20.0488369	14.8161104	12.03913405	0.692136561	9.957962916	1.23410732	10.5957723	12.09456009	7.489385814	4.838120135	10.0556339	4.702415901	6.482733935	6.913397935	5.202512192	3.160132549	0	1.430711527	1.286915123	9.865339096	4.537180971	5.570841226	4.288866732	4.066568413	1.681118836	1.65536743	2.245087161	1.147232656	0.142077366	0.144479821	9.244454346	8.361258844	5.339497492	0.79952544	2.291543943	2.562401831	4.041047482	0.375718495	0.157082884	0.231777601	0	0.092975849	A03	324779	327062	+	996	Bra005729	GO:0008152;GO:0016491
Bra005779	2.561683302	3.734443325	6.164138808	3.405883251	3.505878778	3.155766086	7.991558098	13.93710846	7.396849245	3.051283458	5.195059419	6.807027536	4.2852517	2.348880895	1.656301151	1.662969409	0.077385149	0.570351942	2.93922078	5.823706288	6.439355329	10.41005227	6.477446468	6.046568588	4.052018873	4.203758884	5.993317644	0.66355617	0.398243124	0.134992403	2.429270895	5.795522783	3.238391784	1.784556783	4.757927386	4.368253698	5.148665306	2.691356872	2.103672839	0.144371789	0.276226982	0.289568309	A03	569538	573781	-	1599	Bra005779	-
Bra006423	16.46355145	8.239321754	16.95665243	0.147774494	2.773138841	1.733472797	7.427261615	8.248844305	2.73706125	2.130484092	6.125054549	3.181653619	7.626645711	7.916962219	4.257918874	3.606174098	0.464186482	0.977484197	1.242973602	4.818327567	2.207187389	3.474655982	1.881562465	2.380636046	1.09238646	2.582749877	4.177079026	1.049741594	0.227506522	0.154235693	0.848089511	3.624027478	1.575011699	0.640134516	1.003601404	0.287939552	3.333480267	0.133696185	0.167689766	0.082476059	0	0	A03	3456076	3457973	-	933	Bra006423	GO:0004601;GO:0006979;GO:0020037;GO:0055114
Bra006620	0.377593252	1.316038948	1.666725318	0.101676698	0.954033384	0.381670825	0.890795017	1.72736957	1.238975968	0.399787139	0.477917426	0.243238514	0.728824612	1.015596511	1.061476185	0.880439737	0.319384947	0.546455836	0.765207433	0.568331178	1.392106943	0.551711033	0.647307441	0.915355179	2.738043876	2.946193429	3.675017518	1.324176251	2.452406221	1.804079886	0.47743414	0.738821728	0.877274215	2.349048196	0.9494802	1.882118159	2.878257472	5.795374656	3.807522286	1.645689335	2.551534705	1.639007879	A03	4303099	4304630	-	1356	Bra006620	-
Bra007229	3.305270511	4.672437305	8.694880825	3.155557815	2.458347594	2.429791728	9.028791893	8.954517024	2.760647861	3.040008937	4.425478646	3.484134773	6.495777666	9.624760019	8.379382704	5.796134323	2.832051227	3.144341222	0.788030521	4.447258175	2.551304829	3.878165937	3.571435234	4.217147843	2.392480205	2.828292999	2.399578069	1.628516375	0.581316548	0.337797891	3.461584302	3.601105551	3.038842994	2.726081459	2.266716815	0.788285218	1.9325624	1.830084217	0.734528414	0.180634186	0.259205953	0.543450382	A09	29620155	29621427	-	852	Bra007229	GO:0005515
Bra007772	8.69163727	8.594693106	7.086277189	0.851071623	3.911320542	2.966531436	5.830477881	7.199853937	9.126205202	5.52416045	5.506969625	6.049818027	5.229027373	4.084857154	3.96014861	1.435637666	2.291460252	2.613735853	2.691205724	4.870407751	2.824836535	10.88534626	8.256309372	5.184718561	3.980233508	2.34864097	3.380357994	1.439460475	1.747025393	1.142078583	2.917933754	7.28853498	3.702408453	2.223724196	5.470357783	3.553539715	4.409711265	1.429983265	2.483405589	1.221431165	1.428147085	0.816613273	A09	32330585	32331151	+	567	Bra007772	-
Bra008087	0	0.127814698	0.077939152	4.835418106	1.185414187	5.662161311	0.394628391	0.498497076	0.66743197	0.336506121	0.47540931	0.245684488	0.081794842	0.349707686	0.071476683	0.067370706	0	0.035381469	0.189436827	0.119592967	0.177538609	0.657875167	0.690139827	3.446824071	0.36151337	0.432989676	1.269050599	0.101325151	0.043919633	0	0.803725256	1.282619284	1.042465844	0.041192186	0.07265364	0	2.536229902	0.271002415	0.09711642	0.095530929	0	0	A02	12063978	12065928	-	1611	Bra008087	GO:0055085
Bra008765	255.1548643	258.6833152	198.3847588	15.01290344	12.59445215	22.1394523	36.1669028	54.72833235	67.5007323	207.7424278	127.2546385	153.9213317	40.9955746	28.37761305	10.49134755	3.858994046	7.699306446	11.65324077	50.18560434	61.65256621	23.6438818	189.8008557	278.0188336	214.5643929	23.61947601	18.31939956	14.76540372	15.23524967	4.40250399	2.558256027	99.42795835	155.0072612	21.7701617	35.0973901	138.8934163	79.99728606	39.57124314	4.157951341	10.77798026	3.420007261	3.271755139	2.881011627	A10	12564887	12565111	+	225	Bra008765	-
Bra009116	16.1725626	10.08636633	15.07619759	0.74125593	2.428803885	1.97093993	8.317111593	8.635255806	3.853881376	4.965575988	6.546020498	3.664793613	7.556787945	4.599470806	6.190803038	3.598356343	0.554385545	1.63439562	0.984460416	6.099884276	3.48548379	5.921500677	3.670395598	3.980525863	1.956982656	2.500166193	3.892863883	0.292535516	0.38040069	0	1.41804214	5.498462239	0.376212472	0.951406617	1.887822802	2.166512923	2.076484809	1.00595597	0.420576753	0.137903519	0	0	A10	15178109	15178666	-	558	Bra009116	-
Bra009164	0.557752124	2.915929434	2.461960273	0.525661885	0.805271876	0.916134708	1.731335344	4.155364109	3.001399037	2.034065867	2.823773548	4.167804501	1.794274098	0.750081083	0.689890143	0.059114492	0.336979449	0.06209101	0.066488612	1.888865386	2.056314831	2.78439784	5.035741635	4.34093103	0.317210261	0.759854431	0.208786817	0.444539264	0.462447898	0	3.291071063	3.615035398	1.448295071	0.795170726	2.550000298	2.4874778	0.531442965	0.135880763	0.085214898	0.083823707	0.080190077	0	A10	14984704	14985697	-	918	Bra009164	GO:0008146
Bra009202	6.913802374	5.507866708	8.913208027	5.531965552	2.661870924	5.191430012	17.2671845	19.82910592	9.955860221	11.52637325	4.727681471	7.329587225	15.04797877	21.05909465	7.107959044	2.009892732	1.336685147	5.101811328	7.346991626	13.67678456	6.532434488	11.73748195	6.682450398	12.29930459	2.471596614	4.305841778	2.760625695	3.27477258	1.091890871	0.888283343	9.546718044	11.40213995	11.87856045	2.867433831	2.709375317	0.829159267	3.764387666	0.962488736	0.96576884	0	0	0.285814646	A10	14859779	14860199	-	324	Bra009202	-
Bra009477	2.633829476	1.906569245	1.937653919	0	0.507023033	0.26622718	2.485428071	2.685191427	0.898792937	0.371818492	2.66689724	1.425197516	3.185833344	3.220045054	4.205542434	0.502473183	0	0.175924529	2.197818008	1.982142689	1.53011979	2.180734352	1.023438349	3.091628475	4.718502627	2.479121023	4.140938542	1.679370554	2.547745365	1.702543073	0.518038964	1.030701916	0.719912755	2.321255959	1.083750127	0.967352478	2.509591777	7.892407638	1.770576207	1.187502521	1.817641744	2.953418004	A10	15662803	15663774	-	972	Bra009477	GO:0004197;GO:0006508
Bra009910	4.253913105	3.801618435	4.046242866	0.555382087	1.302788791	1.36813424	2.432866148	2.291429914	2.368652545	1.577139464	2.135861673	2.059370429	1.393354122	0.81950633	1.217586942	1.256941981	0.249222263	0.746217638	1.04493583	1.358156985	1.440154578	3.515838286	2.475022047	1.447335332	0.733129454	0.702463613	1.158104521	0.410963791	0.142506603	0.144916316	0.796845432	1.135017669	0.49328161	0.06682841	0.942960835	0.811624177	1.289672391	0.502471461	0.157557454	0	0	0.093256742	A06	18630352	18631559	-	993	Bra009910	GO:0003677
Bra010560	146.4047037	276.2618836	144.39397	58.3090446	53.64620581	29.92060721	143.837609	208.2985611	87.92269058	214.5857471	188.7708661	203.670905	111.1821945	48.77402243	29.50691498	1.808903459	2.577892783	5.937452839	40.94534948	147.1740947	54.58113843	278.4669488	218.7057651	232.4568567	94.33634894	80.05929905	58.56470224	6.461378207	5.011779096	2.997956281	212.2035606	246.5471193	97.96572767	25.43823442	191.6612099	114.175231	79.53210041	47.2966965	34.55038026	8.65689338	62.26558999	8.874544744	A08	14400911	14401150	+	240	Bra010560	GO:0003677
Bra011019	57.51873108	92.70383447	76.69485854	39.45214354	23.94794895	36.23939696	67.15242707	78.33784444	68.01662687	278.5915239	103.954206	130.3905011	73.30145644	83.13838507	63.05775095	14.47122767	31.87212896	40.66461207	73.71946443	111.1503245	48.53582774	221.0894791	348.3637153	189.4778965	84.33426142	76.80971025	36.83975603	54.62359922	60.64673864	54.32141044	151.9009419	164.9678574	65.18931538	81.35638608	113.0421756	96.70150711	76.40044764	60.74928907	62.37863311	34.31111181	80.56165901	46.18170771	A08	16828535	16829689	+	1155	Bra011019	GO:0005199;GO:0009664
Bra012092	52.42956575	50.16290263	105.8897779	44.15000124	116.1067	86.88266148	98.10412783	230.7442854	139.7839878	94.86221349	143.0773052	135.4380248	167.5562249	95.43013523	73.38857341	55.65280621	11.78465272	21.59610175	71.9464598	98.30442824	96.95681177	190.0848212	86.78547802	190.1213754	54.21044544	75.01063271	64.28559071	23.31925969	15.72322854	14.7477104	105.1449021	256.0349986	113.8732061	25.46342306	65.83277168	69.43307599	163.252842	29.31226566	22.45862446	18.69320739	18.08609984	16.42457826	A07	12304070	12305518	-	1449	Bra012092	GO:0008152;GO:0016758
Bra012353	21.19458072	21.23394767	37.8868331	56.77148359	72.47446887	93.86857162	23.54616068	24.34897566	14.64097091	9.05487386	40.17459639	26.30028357	62.01011284	123.6951895	243.7193722	130.5247986	30.32815039	11.67310989	10.90413237	12.03277209	20.31389803	13.85407706	22.69270914	24.90698132	11.26096425	7.736699665	47.04662949	6.045733995	6.011822676	2.978361796	1.097023688	14.32372516	2.896590143	2.168647436	10.07250118	9.949911202	142.4267145	2.174092204	3.238166111	3.688243125	2.084942	4.03503029	A07	10512407	10513163	-	459	Bra012353	GO:0030001;GO:0046872
Bra012787	0.380964621	1.225651658	0.560535598	4.513719146	8.067098618	4.428403898	3.027363515	2.390115446	0.800024482	3.40612297	2.980777191	1.570625834	3.725682003	1.490420854	6.68275078	7.590934158	3.13029838	2.374981136	1.99822025	1.146811127	1.532221603	2.041002424	1.915721784	3.305258082	3.033323117	1.698570701	2.091596509	2.429089551	1.895210583	2.355537078	0.642262593	3.168027988	0.208260475	0.39500364	0.522522383	0.599659827	7.44138776	2.041851105	1.16409637	2.061165091	3.505451935	1.378034898	A03	22295487	22295822	-	336	Bra012787	-
Bra012904	1.97308844	1.631053458	1.00802805	0	0.593480718	0.290849347	0.65330388	1.074554151	1.640127262	0.541608439	0.983794988	0.550778231	0.761684912	0.643264492	0.22186693	0.139414525	0	0	0.627222051	0.494962799	0.551088052	1.56158672	1.165070246	1.300675061	0.140269277	0.407278781	0.123099742	0.157258977	0	0	0.6930001	0.804304964	0.269655182	0	0.526213934	0.517625438	0.235002236	0.040057335	0.200969238	0	0	0	A03	21634074	21636127	-	1557	Bra012904	-
Bra013512	49.77937709	45.75766189	29.2308934	37.3863606	32.51285201	39.87702834	16.65049933	17.26194489	17.86721343	50.35484718	39.12026536	47.293289	21.00325995	15.73222012	25.58865256	40.26963653	30.36184834	23.67441513	19.53815355	24.55025302	17.63000659	36.53188176	44.11965321	32.92296286	10.39996497	14.25960589	15.71866467	7.341248422	8.984702021	7.233164361	17.03185246	17.14462205	21.01116797	6.846729761	26.70669955	22.74265418	25.89360944	3.62995752	6.415464438	7.837516641	5.939793556	3.552267737	A01	6069669	6072707	+	756	Bra013512	GO:0016491
Bra013560	16.22844162	13.59041667	16.63401364	5.204630313	4.650961286	5.252867054	6.88272389	13.3465136	13.3063901	14.15770411	21.90399167	21.98876168	8.165327359	10.43294597	7.545371908	2.551017699	1.057597039	5.358931793	5.216798788	5.397527016	5.133597165	24.68867578	19.33881695	16.37839299	4.355540886	4.968278974	5.733607212	2.20901819	2.217378383	1.12743655	14.03828664	12.30895942	6.778255476	2.552331213	11.67115521	6.697055617	5.385970045	3.02073388	2.674436788	0.328846852	1.677823148	0.659572259	A01	6355531	6359882	+	702	Bra013560	-
Bra013936	2.746646949	1.630232488	1.846968578	0.334915635	1.812350753	0.855591642	2.848418142	2.239805892	4.316893237	0.99171669	1.685534023	1.566810549	2.133951252	1.621964071	2.035696448	0.74699657	0.200386807	0.692302193	1.400298622	2.686726204	1.960802526	1.901430009	1.121370602	1.251889129	0.785962265	0.650392884	0.603537601	0.154202932	0.133679271	0.058259879	3.048190399	2.535025968	1.718696977	0.28657754	0.963528453	0.779476849	1.08633827	0.101002867	0.126683848	0.083077099	0.11921375	0.024994317	A01	8550646	8556490	+	3705	Bra013936	GO:0000166;GO:0005524;GO:0006810;GO:0016021;GO:0016887;GO:0017111;GO:0042626;GO:0055085
Bra014231	0.32571021	0.218309456	0.079872757	0	0.058781773	0.020576719	0.161767516	0.255432185	0.170997599	0.095792932	0.11243165	0.230798071	0.083824103	0.039820404	0.03662498	0.034521058	0.039357142	0	0.058240979	0.020426661	0.072777277	0.138805161	0.390855104	0.415569045	0.069465415	0	0.162566835	0.025959736	0.022504621	0	0.022879583	0.139410302	0.044513689	0.021107065	0.018614029	0.085447711	0.019396654	0	0	0	0	0	A08	2347347	2355923	-	3144	Bra014231	-
Bra014374	48.52660224	30.70267987	34.91391331	1.726396583	18.67250241	9.497275311	27.88939031	29.64733875	17.11969487	9.36289052	20.4520744	13.95659744	23.09983802	23.78495455	17.69992288	15.27726756	0.641133956	6.645024939	9.329420215	15.69487284	13.43626912	13.35159758	9.196908347	12.41108795	4.086342023	6.516566006	11.91707554	1.550589807	0.549905661	0.124267618	7.951188712	15.84303665	4.773804889	2.406861558	7.782785885	3.827880346	14.64015224	1.29262736	1.823952032	0.598058265	0.508562975	0.159937729	A08	1313735	1317647	-	1158	Bra014374	GO:0006629;GO:0016788
Bra014807	10.26997429	8.288608729	10.02194995	0.513177182	1.375756047	0.695625858	4.33821943	4.954201247	2.556902067	1.943051474	4.044563533	1.636880522	5.258870457	5.358858106	5.381236487	1.324135286	0.230283226	0.990066578	0.807762393	5.152587299	1.916227513	2.500953116	2.202237359	2.431542948	0.752685637	1.180148378	1.321107653	0.472557372	0.117046366	0.08926917	1.100718025	2.019843272	1.244395099	0.548888433	1.427968529	1.111032268	2.54726679	0.257937428	0.258816463	0.095471667	0.091333115	0.076595488	A04	3293509	3296114	-	2418	Bra014807	GO:0005199;GO:0009664
Bra014822	3.697896584	5.389235733	5.487435898	3.268115034	2.737924379	3.737829609	8.947541057	10.11284402	6.172633337	9.102116681	6.982421864	9.381871648	5.758902146	5.100551365	12.70903077	6.190469615	2.841410712	3.462194722	4.249952079	9.41914206	5.762666532	7.388841097	6.241769885	7.161824572	2.911990192	2.160749692	2.460900619	4.473843156	2.306073519	2.984632031	9.591121384	7.699343315	3.835695157	2.654424461	4.161600487	2.089481352	5.059337023	1.293584862	1.738383912	2.052004357	2.508345607	1.509101328	A04	3400486	3402345	+	675	Bra014822	GO:0003700;GO:0005634;GO:0006355;GO:0043565
Bra015029	27.37342847	32.13129934	25.61977409	92.76054907	96.78361363	64.21751944	53.75796242	31.41127211	27.58907956	29.15767806	87.57709041	51.41489862	57.73076912	65.28262518	180.5552258	251.5838892	132.9889395	77.60600122	17.35352773	28.72649442	26.42831902	36.13774879	30.11883446	43.55163591	17.30778484	19.66123341	42.67080578	21.90467225	18.55572191	24.2481758	14.28089765	18.72315503	15.77879367	8.945670671	22.95000269	11.3582626	75.25730606	5.579603821	4.697471234	25.8386578	20.74918241	30.41404081	A07	6350935	6351901	+	816	Bra015029	GO:0003677
Bra015049	4.080668016	2.661519483	4.143198245	1.593617335	1.07955072	1.037213947	2.607460746	3.892626499	2.330272652	3.997672644	2.877613038	5.386508733	3.169001153	1.937213682	2.275500983	0.303507292	0.369094269	0.828852477	0.864798188	3.136840578	1.279707826	4.927960295	3.534559289	4.238246447	0.922890255	0.756609171	0.786103386	0.30431547	0.501243863	0.187791445	7.858497107	5.789916134	3.678802493	0.247429573	1.178305507	1.752920598	0.432020329	0.418585705	0.49584776	0.086074008	0.411714153	0.207167663	A07	6178685	6182869	-	2682	Bra015049	GO:0000166;GO:0005524;GO:0016887;GO:0017111
Bra015402	12.85341502	11.79467682	10.78827933	0	0.637715306	0.066970191	2.764114514	3.879607681	0.765240809	2.369476849	2.866425125	2.868099349	1.364094097	1.814425387	1.609224268	0	0	0.059005742	0.31592415	2.326863157	0.829028114	4.001332815	1.999014035	2.366936734	0.226086195	1.575485868	0.529099512	0.929390785	0	0	1.265908878	2.592759479	0.57950741	0.13739257	0.726987663	0.417154662	0.820683274	0	0	0	0	0	A10	1585992	1587331	-	966	Bra015402	GO:0004601;GO:0006979;GO:0020037;GO:0055114
Bra015493	10.37187473	9.495166992	7.857837631	0.363303302	1.70443909	2.812748033	3.936769156	5.995757325	4.692633721	2.222093121	8.926391588	8.517385946	3.125015568	1.3195821	1.441258099	1.143970567	0.244543189	0.525687524	1.286672903	3.55375464	2.863915302	5.256882994	4.780011523	7.746338403	1.534645688	1.169678902	0.589224457	0.430131272	0.093220723	0.28439111	3.411861362	3.794857056	2.950219542	0.174863271	1.773409298	2.300671167	0.482079685	0.410864757	0	0.202767229	0	0	A10	952548	954037	+	759	Bra015493	-
Bra015656	327.1695087	242.6285899	183.1024237	16.0414106	30.09873097	28.51051074	44.78527328	46.29295057	79.11891948	335.3577452	109.1444226	93.18694062	49.42047082	45.75976753	32.63199379	14.82042116	7.63820084	12.70921443	46.65082795	56.34090432	63.98682758	102.5061762	216.1151526	84.85481474	67.6522974	60.51902135	69.84024485	37.46523036	45.71383111	13.62034459	29.87133764	59.00768471	33.14216537	417.5778099	318.1627645	282.5171756	84.16258242	86.40232219	87.38744717	9.212140771	45.33088349	46.52715987	A07	24788305	24791589	-	2673	Bra015656	GO:0009055;GO:0016491;GO:0020037;GO:0030151;GO:0055114
Bra015693	2769.548629	4393.93969	1361.169244	330.3524093	229.1210402	81.09349966	682.6465725	472.1610166	389.4182326	3966.289613	641.4411033	1156.319538	83.45527687	114.2682135	316.5080637	223.8280017	200.80428	172.4486302	125.6603272	561.2614375	146.3692768	918.4706217	2242.417428	835.5610568	330.8557278	445.2837859	316.3614777	273.6331026	340.6147824	199.0011822	442.8321702	197.6771	407.8222397	5724.941599	2632.537433	2831.934562	157.6466117	237.9880044	177.4523999	95.04020179	347.9253294	190.8128659	A07	24613567	24615121	+	1140	Bra015693	GO:0008270;GO:0016491;GO:0055114
Bra015960	12.49216307	15.48453197	10.02570134	21.58097588	31.38723195	12.87304582	13.53680416	3.816914401	3.236600946	14.35247654	18.51801996	10.3673249	15.03096842	6.902405322	23.13194732	51.653479	36.93346011	29.69177937	3.713249936	11.55822825	4.205032333	13.11659767	13.20146197	12.08847689	6.551055249	6.670854769	3.967743394	7.965197069	13.27207884	14.31723608	18.14290072	7.221771697	11.44086445	5.214648814	7.120609198	5.277614497	4.251038543	5.454346816	11.7985372	12.28861925	24.72476555	10.09371265	A07	23331267	23332578	+	789	Bra015960	GO:0030528;GO:0045449
Bra016169	3.282156731	4.46746403	2.105048873	27.46594458	14.94517893	8.038800592	5.391931468	4.619947016	2.916065568	25.42446445	3.718449514	2.732331333	4.288421265	5.432539916	5.791514558	28.57853394	28.18902878	8.094610261	1.203876643	2.026711578	6.431099746	2.705233981	11.6571516	5.154039752	3.15896372	2.501511092	6.426680612	9.336902797	17.86307621	20.01002772	1.702565926	3.828539219	3.450469416	21.46575994	9.926894653	19.0755694	7.216932566	6.519864528	4.937421763	11.83848667	10.59932508	18.08242716	A07	22348694	22349578	-	507	Bra016169	GO:0031072
Bra016300	5.772734486	5.652417057	4.759789862	1.261588524	2.254761254	1.522193053	4.820037597	3.236809938	2.72322059	2.834569208	1.771276135	2.5006827	5.167509403	1.8001946	1.580475599	0.993123468	0.242625203	1.266656606	3.590385048	4.6172265	3.738754238	2.60782627	4.283567568	3.415814581	7.803372411	14.00895261	9.604193594	4.694334631	3.329624867	3.574034155	1.880612036	2.209946168	4.024735777	19.51782692	5.508000645	10.00844009	10.76172003	17.12097611	11.55514012	2.212945875	7.313335017	7.868309065	A08	17008523	17009456	+	765	Bra016300	GO:0003677;GO:0003700;GO:0005634;GO:0006355;GO:0030528;GO:0043565
Bra016466	1.709830283	2.333724103	2.973186997	1.716095241	2.319006988	3.338750701	1.544010536	1.665969965	2.366556938	1.828615534	4.364013665	2.763614855	3.200279048	2.812524598	2.377087943	1.482707753	1.277207354	1.072851223	1.408250602	1.598711808	1.562921854	3.520298269	2.842336013	2.895509491	1.502848612	1.886613238	2.055922649	1.090214327	1.202869943	1.179523783	3.494033291	2.889344716	1.274599631	0.402918103	2.522828164	1.549576335	2.517819947	0.833105005	0.712452423	0.654099749	0.759833844	0.674709983	A08	17833726	17835644	+	1647	Bra016466	GO:0003824;GO:0008152
Bra016554	4.587961022	4.674169763	6.975554108	12.3542655	14.57282331	8.579385579	4.101589279	5.516968987	5.539954478	5.181470596	9.924611722	8.748217011	15.82202476	10.32076376	5.159002532	8.169241428	3.769821705	5.720384671	3.719072684	4.143317622	10.04639445	9.831925653	5.453159174	10.53668611	2.609310208	5.000332387	2.976895911	4.680568254	3.550406444	3.868330685	6.961297779	5.835102784	4.765357977	1.66496158	4.824436048	3.85157853	3.93439227	2.011911939	2.243076016	1.93064926	1.583107325	2.655310255	A08	18254207	18256304	-	279	Bra016554	-
Bra016747	16.85239329	18.39044918	22.63421984	8.776676117	54.29503685	23.09936767	60.33703673	80.74938643	95.04735305	63.05809235	108.9980601	151.7071856	77.24798562	44.52114793	24.88896284	6.469342232	1.324750458	1.913179248	34.792244	102.6502145	69.98091136	278.5968308	122.1466144	183.5066326	66.90162653	66.67938503	38.04487286	3.73135145	2.538646274	0.916042197	45.41629093	105.0108101	48.43213058	10.44565181	38.98113737	29.07239679	57.70100469	12.19954473	16.88586456	3.028131429	5.410324253	2.411561072	A08	19017706	19024056	-	1728	Bra016747	GO:0006855;GO:0008800;GO:0015238;GO:0015297;GO:0016020;GO:0030655;GO:0046677;GO:0055085
Bra017159	2.81287576	1.880451858	1.827499621	0.039347489	0.914204202	0.590805523	1.778057681	2.100900563	1.035648131	1.100175264	1.883101787	1.506079567	2.256361127	1.32198288	0.525794231	0.154871871	0	0.585611787	0.418058533	1.28296222	0.783601916	1.708036897	1.502994675	1.267770223	0.415523715	0.325753285	1.05751953	0.186341116	0.08077001	0	0.61586824	1.536787147	1.278091685	0.530278859	0.668065147	0.383344182	0.730961578	0.177994492	0.133950815	0.043921326	0.37815663	0	A04	16371058	16375363	-	1752	Bra017159	GO:0005506;GO:0005783;GO:0006633;GO:0016491;GO:0055114
Bra017210	417.8871004	330.0500785	267.2708159	132.4069687	69.86819474	101.7970991	196.8498113	202.1272919	246.5934383	103.195831	111.5539676	127.8876111	169.0733315	268.4571603	134.0749835	117.2659822	113.6982643	249.5471188	264.5479793	284.3922403	264.5734866	267.7400991	188.2567006	131.7994182	150.7683258	145.1577064	162.3287182	151.8708448	168.9431548	127.0503188	145.757187	152.1643202	128.6594619	188.6489307	339.4791061	338.9678774	101.8352773	130.7770588	121.145883	84.36490941	84.64478545	113.7376256	A04	16132008	16134574	-	2169	Bra017210	GO:0009058;GO:0016211
Bra017752	85.58223677	61.33286603	129.4233578	59.48008642	122.9696613	83.81087618	126.2527023	238.4354655	198.8922403	127.3035013	211.2602231	233.7997371	151.7483855	94.81942822	102.9328154	72.77357762	28.55512006	37.92662183	77.430336	122.3912122	95.11822176	171.1244941	112.6444409	166.3756245	45.35984723	59.3077011	52.1348713	25.58391857	16.37332356	14.15957813	161.8962845	238.4191923	125.5073746	14.08036052	79.60561509	48.00353794	79.08254565	17.15154928	16.14691211	13.56493265	15.38354099	10.32890157	A03	30270972	30273006	-	1560	Bra017752	GO:0004497;GO:0005506;GO:0009055;GO:0020037
Bra017753	1.627543699	1.509531114	1.164989449	0.18951698	0.889119773	0.578014888	1.354511099	1.379860464	1.801292236	1.076357036	1.498161392	0.906753059	1.22262207	1.161606356	1.503663088	0.372969785	0.170087771	0.195874733	0.964838869	0.794491833	0.982868382	1.156886847	1.5282684	1.032667656	0.450307762	0.52299634	0.746466683	0	0.097257084	0	1.384285561	2.194757534	0.817583392	0.182434671	0.603324813	0.507753201	1.047819247	0.300058344	0.215057804	0.317320261	0.151782455	0	A03	30292563	30294896	+	1455	Bra017753	GO:0008152;GO:0016491;GO:0055114
Bra018076	43.0863516	34.6173161	33.85195376	7.659644611	7.247446887	11.9097512	15.16649761	19.1729958	26.28054279	23.81825515	15.08151781	20.8390225	24.40212774	24.54810818	10.22291757	7.684883976	7.817923212	8.13392232	17.22055051	17.69936825	15.76508037	58.81191535	48.4451094	28.53628431	15.4640002	16.02602073	14.68467281	13.24727008	9.017734014	6.975636837	12.92920775	16.16534697	13.03465564	17.85519722	57.37500671	49.74955601	23.11776896	12.16132827	14.6569624	9.891197472	7.297297001	9.280569666	A06	9740252	9741348	+	918	Bra018076	GO:0016491
Bra018445	3.001771483	2.912547993	1.787704822	0	0.722316733	0.469576584	1.384372261	1.868320282	1.238228847	0.605372821	0.986837261	0.626145642	1.103613817	1.013586041	0.867956808	0.121199562	0.069089254	0.2227788	0.477114261	0.9323043	0.83041677	1.18351412	0.882159689	1.386065464	0.243885276	0.354066478	0.428065434	0.136712578	0.039505599	0	0.923767972	1.433400781	0.703271555	0.296418142	0.718869431	0.412496319	0.340497377	0.174118565	0.043677988	0	0	0.051705162	A05	8259031	8261374	+	1791	Bra018445	-
Bra019058	10.87413577	5.997363451	8.126859155	16.50913693	14.65321179	6.490256789	7.201010304	2.598960485	3.479718135	5.360684082	2.38325989	2.241572792	8.209065302	7.900677534	7.17351789	20.10868408	24.22718655	23.61146294	5.827113597	7.897780192	3.239648697	1.714946432	7.101528237	2.748404208	7.892530052	10.46627384	12.19882589	7.924020284	12.5938481	20.0251837	4.888678375	4.052759962	7.699571754	11.7043797	8.049212107	7.82468745	7.302181122	7.871849626	16.20241316	13.69663102	16.55730453	10.18943086	A03	26559769	26560470	+	618	Bra019058	GO:0005622;GO:0008270
Bra019141	9.812161935	3.985859049	9.333145566	0.400329858	1.43097093	1.202196604	3.618068592	3.342275258	1.170767535	0.20987664	2.258034945	0.996006626	2.831327016	4.144097007	2.273556238	1.701755867	0.215572916	0.264806259	0	2.013912224	1.129442482	1.592977501	0.815562267	0.910487162	0.253657682	0.294603048	1.632465568	0.853143647	0	0	0.417731768	0.654513673	0.243817142	0.308295524	0.135940782	0.234013591	1.1332512	0	0.363425208	0	0	0.107553943	A03	26136714	26138028	+	861	Bra019141	GO:0004553;GO:0005618;GO:0005975;GO:0006073;GO:0016762;GO:0048046
Bra019754	8.069095757	5.161217755	7.49226182	1.93425369	3.66439374	4.429052178	4.828152138	7.385841222	8.346832306	6.467388313	7.052951378	5.996935003	5.27480337	5.316001653	6.267927521	3.390425114	1.897977178	3.817029165	3.105488302	6.39090855	3.852049821	7.790002924	5.560499266	6.281015953	2.777992888	3.700888801	3.059394709	1.862574615	2.064666373	2.341837903	7.508201083	9.22946716	4.895406732	0.868919343	4.553939927	3.944788027	5.019183554	1.353317496	1.053566007	1.554548755	1.239301189	0.866104986	A06	4614125	4616797	+	2673	Bra019754	GO:0000150;GO:0005524;GO:0006310;GO:0006915
Bra020159	121.2625626	150.2681616	134.1817588	221.2411749	171.9142718	255.9263181	97.65063755	98.15407432	88.61711183	489.1049169	138.8803709	181.3633063	206.354153	182.868677	186.3877452	183.9293037	248.6326032	145.9948404	19.04340229	85.97107844	34.85565801	108.7267967	306.861012	178.7359138	91.43649204	91.48426305	42.76288076	219.9317113	150.0939396	177.5749464	257.8093428	123.0596246	169.4340585	172.979994	237.2112278	192.2621342	84.40058297	71.18412695	32.1253347	226.2334803	193.0662708	188.4181604	A02	4295875	4296710	-	750	Bra020159	-
Bra020427	15.59024447	10.2294773	16.09743256	0.441902574	2.171911166	0.829400061	5.705415856	6.327677431	1.61543405	3.668132429	5.475997916	3.700032013	7.074270686	4.012671529	2.675736506	2.261129324	0	0.822108855	0.586889864	3.910919999	3.57518374	3.896459172	2.625744543	2.931360109	0.233332547	1.930853874	2.047716862	0.523188519	0.113388667	0	1.152779012	3.311377671	0.336420768	0.744429937	1.219218893	0.430525004	1.954585903	0.199901507	0.376092673	0	0	0	A02	5667762	5668815	-	624	Bra020427	GO:0005576
Bra020839	4.158325689	6.592205526	11.35005414	0.77894691	6.438762841	2.010240826	9.159057415	14.93484567	10.06132484	1.531388026	4.826303248	3.913254197	10.42260371	7.250013304	5.529751188	6.438469939	0.174772392	0.966094021	4.655329766	5.442493486	5.655657894	12.68000273	3.306022185	4.798061583	1.233894149	1.0748018	9.926220719	0	0	0	0	3.18382075	1.186025759	0	2.645085055	1.707505948	10.50838387	1.409475031	0.220981006	0	0	0	A08	10968437	10968790	+	354	Bra020839	-
Bra020862	5.132040296	3.593295516	5.408481316	0.228418825	1.673780808	1.886349244	2.022254754	3.14880683	4.141677438	1.756343413	1.834967973	3.322357629	1.484503198	2.032661442	0.877543254	0.395585249	0.369002546	0.868780376	2.710038814	2.170505355	1.857484461	4.338006235	4.575850189	2.857264384	2.894622458	1.764982677	2.921355109	0.324522501	0.468883555	0.762899412	1.239409324	2.738634416	0.556465366	1.319296452	1.706421671	2.269885309	4.162529661	1.322608776	2.229140404	0.458947297	0.243918127	0.675045326	A08	10790935	10796178	-	1509	Bra020862	GO:0006855;GO:0015238;GO:0015297;GO:0016020;GO:0055085
Bra020982	46.28397289	25.48247514	38.25576284	91.08114936	43.90291574	95.39506466	24.68070934	31.97623377	48.16418577	81.38233508	44.98209727	66.60518367	59.92997134	42.64119323	46.0967494	65.39207904	185.3086706	181.625676	111.3338124	39.13411983	42.75215682	46.7449307	60.78357931	50.19510579	20.03609071	25.539338	23.04945798	36.69160353	88.4003309	72.99624301	136.02904	62.56460458	51.67683663	6.052259163	32.3078246	26.2359644	17.52217639	12.33290652	33.14715087	57.69709587	31.66789629	23.54337589	A08	9981393	9983941	+	1239	Bra020982	GO:0004672;GO:0004674;GO:0005524;GO:0006468
Bra021815	5.413640819	14.74328672	6.672775465	0.69051888	3.633806146	0.82801542	7.252531961	4.543480448	3.552696364	3.418992075	3.835815016	4.331675923	5.9762807	6.061210683	4.677725301	3.321859441	0.378722145	1.300490505	2.547435134	5.610886718	2.069110234	3.816231577	3.028404629	4.507848792	1.458425806	2.25845943	3.519748382	0.454187028	0.94496866	0.760750175	1.641218601	3.345049291	3.309916071	0.849356742	2.312241506	1.083859275	3.020308367	0.312366962	0.565917968	0.599500438	0.450617361	0.360727666	A04	14765737	14768925	+	1797	Bra021815	GO:0004553;GO:0005975
Bra021961	137.7459221	133.2458445	80.82389479	20.16518683	40.59741188	27.1755469	60.65539043	54.74502522	68.05922558	98.18853735	28.15456775	42.12642862	48.23777751	85.69919908	52.43389073	39.8235634	45.08681868	43.71904049	67.57617572	61.10865008	39.10813234	70.8784478	201.1756668	58.60583659	172.4660858	143.8662422	135.4376648	57.46531853	62.15087402	43.62332303	38.16874836	27.63372313	54.02871764	611.8606384	242.4006215	275.1010844	87.17054234	151.9985784	166.2329616	51.56184417	49.89009271	62.05094284	A02	17583203	17586052	+	1176	Bra021961	-
Bra022017	4.760483523	4.537949939	4.583111996	1.709176897	1.951619651	3.386145704	4.028144843	5.807387944	4.350546357	6.637421012	5.274685938	4.815720532	3.811572019	3.621353148	3.806576414	1.195969229	1.448733134	1.805770781	3.362895086	5.307555631	2.048590132	4.98059795	7.012318957	6.208807599	2.707428898	5.153422954	2.20002638	2.585675489	1.461870422	1.09016592	5.350418954	5.519792081	2.698780377	0.731246408	4.594742273	1.66517109	4.955925249	3.608139593	2.370523517	2.437815093	2.23074214	2.295965582	A02	18211946	18212829	+	726	Bra022017	-
Bra022026	2.704312236	2.094540861	3.389529813	0.485470433	3.036782322	1.822343796	4.775559348	7.697742705	3.155026126	3.676289877	5.116959685	2.632457384	4.485179817	7.934916657	5.000599356	3.566851891	1.016633774	0.267603508	1.432782766	5.427162519	3.491259239	5.122105954	2.472532085	1.840209968	0.683565773	1.042002684	2.699525327	0.574770485	0.166090442	0.506696836	0.506573313	3.821581401	0.985570701	0.155776083	1.099014213	0.315314087	3.006208178	0	0.183632103	0	0.172803969	0.434760306	A02	18320502	18320927	-	426	Bra022026	-
Bra022103	2.941109581	1.883031353	4.521192477	0.236408784	0.802786469	1.641734277	2.485428071	2.937645322	1.106206691	2.43747678	1.575893824	2.533684473	2.440212774	1.760291296	0.908239211	0.558303537	0.042434449	0.156377359	1.004716804	1.145237998	1.137781382	1.795898878	1.765932838	1.344186293	0.199724979	0.34794681	1.007847476	0.055979018	0.048528483	0.049349075	0.246685221	2.619700704	0.479941837	0	0.481666723	0.460644037	1.422102007	0.342218217	0.160961473	0	0.050490048	0	A02	19058505	19064941	+	1458	Bra022103	-
Bra023159	48.30343869	41.87257739	79.5608011	29.04884088	29.63932288	25.83659436	56.5774257	83.96971624	120.4565164	41.48231589	80.03436382	56.42399222	40.6088239	36.81058297	30.05459664	28.1574595	10.31157113	14.33950874	38.77164231	56.1432567	57.02305638	64.30382936	37.17091736	56.28843509	17.85654363	10.76829728	15.06810521	10.52299926	8.009946613	3.846434474	49.31284108	76.98905753	41.58922401	6.051753881	27.7889891	25.55531438	31.06685217	4.314855165	3.935963575	1.451889875	4.16685796	0.873622124	A09	21217121	21217438	+	318	Bra023159	-
Bra023639	22.7745795	15.52229366	19.58089626	1.034421459	5.216142105	3.536284505	9.744022119	15.70866872	6.626569343	5.229370043	9.850603193	8.343002822	8.050348251	6.575104216	5.245262381	5.409261148	0.132624709	3.909936789	2.485947204	8.879489373	4.107820975	9.889405487	8.780624838	8.052151334	4.291518236	3.806157713	5.067276195	1.837047789	1.137532611	1.31100339	6.399220859	5.771599316	5.250038996	1.493647205	4.13985579	4.751002616	4.706089789	1.604354215	2.59919138	0.742284534	1.341314406	0.893285645	A02	3297452	3299007	-	933	Bra023639	GO:0004601;GO:0006979;GO:0020037;GO:0055114
Bra023703	12.34850839	12.51009968	9.587091606	0.792377029	4.40023561	3.186857378	7.777192479	7.637380391	5.24153971	2.86831408	4.256525644	7.094896009	7.302607193	6.270046349	3.214338129	2.717810616	0.812734671	1.403929735	2.455493222	6.432687703	4.226818215	5.732721541	3.170849849	4.558976665	1.673557582	1.301586744	2.570237716	0.603084302	0.058090746	0.295365151	2.421403798	4.780959074	4.308837424	0.76276565	1.201200879	1.599092872	2.453342306	0.153618892	0.834938086	0.063177474	0.060438826	0.076029512	A02	3624661	3625878	+	1218	Bra023703	-
Bra024241	1.598909328	1.714687544	2.419785365	1.328546496	1.2751575	0.138529346	3.811755347	3.343773215	1.726819439	1.41880204	1.261545706	1.318383998	1.45785731	1.921270565	1.232857993	0.387345494	0.397448138	0.366164115	1.045593933	2.842061552	1.633203136	2.135960488	0.751819178	1.258987334	1.402993133	1.719989746	2.371317513	0.640821912	0	0.462211675	0.71882066	3.932999604	2.647182404	0.426299432	0.584807349	0.239692722	1.349375793	0.712282885	0.223346969	0.05492517	0.105088495	0	A06	15101758	15104145	+	1401	Bra024241	-
Bra024564	151.9028767	129.2716459	228.8210454	317.5613315	576.8716899	691.7105865	308.6091059	319.5005325	123.999423	222.6156551	404.3509055	379.0958639	341.5497814	355.8603758	303.0787127	560.4635307	175.8038357	198.6159087	328.3076863	337.3671846	405.1093445	304.6761372	229.8028667	349.4840291	178.7505819	257.1184327	296.9838452	139.0023267	172.5688771	165.1333296	84.38090398	309.8822208	371.1634127	39.52626588	179.5116604	171.5136333	447.0981744	186.7669947	202.1939977	143.1076809	133.5519721	145.4000013	A09	25594619	25595433	-	549	Bra024564	GO:0006952;GO:0009607
Bra025214	21.13083762	19.93726696	41.15576924	22.21296937	29.04155502	23.5154665	49.80012983	59.59354513	43.68133672	28.39630939	83.74230508	60.10261525	39.26999557	45.40815534	81.51813601	52.88889161	26.41726319	41.98061893	16.80927095	36.85086423	26.6493061	61.30429098	29.9084807	41.16666537	18.83549212	24.61040216	18.40604928	19.17361353	23.69715158	16.8456591	46.87089676	32.54993463	31.26683939	9.427420209	27.35694963	11.56677177	24.24803426	6.979418322	6.270599112	4.824653101	14.78132232	4.703692452	A06	21654649	21658165	+	1260	Bra025214	GO:0006855;GO:0015238;GO:0015297;GO:0016020;GO:0055085
Bra025385	13.74403131	15.91252024	26.1583279	36.97251533	63.51194774	55.08598739	33.48535734	25.95420235	14.71839912	35.32990708	42.86384576	34.32220172	34.35068751	34.17458585	31.55523741	64.41319689	48.31896474	28.13439191	16.82417609	27.85672841	24.26235803	34.83501106	35.69762224	52.5550991	24.65547252	19.03754171	24.98214571	24.85145464	21.84621657	28.21153731	21.3648377	32.7123976	29.90406828	11.62728663	27.88572442	16.07293348	37.59320221	14.19300698	10.53059485	46.69625299	23.35844414	30.07649501	A06	20780140	20781196	-	936	Bra025385	-
Bra025736	0	0.071273617	0.152114887	0.453374603	0.14926379	0.60460939	0.088023031	0	0.16282949	0.062548905	0.081570349	0.114168025	0.091222907	0.065002779	0.239146286	0.018784044	0.064246549	0.098649268	0.063381668	0.022229638	0	0.258954711	0.182294681	0.271349756	0.12599473	0.131699494	0.176915932	0.056502187	0.097964041	0.099620562	0.074697207	0.130041831	0.048442727	0	0.040514023	0	0.168869727	0.064765597	0.216621048	0.213084565	0.025480959	0.064107958	A06	7291425	7296246	-	2889	Bra025736	GO:0004672;GO:0004674;GO:0005524;GO:0006468;GO:0016021
Bra025822	0.823555871	0.799076816	1.07710762	0.29568481	0.49071255	0.356763997	0.89596604	0.410068827	0.205888653	0.369084532	0.469291911	0.606307767	0.322969338	0.575346285	0.458620152	0.665038036	0.075820376	0.279409545	0.560997664	0.432864984	0.560813136	0.305604641	0.358557553	0.480348925	0.579900008	0.233137155	1.174425847	0.500106672	0.520253885	0.308613147	0.396691601	0.345304089	0.25726294	0.975891346	0.609609446	1.440359388	0.560506252	0.42038111	0.958667599	0.377206683	0.586389938	0.453940908	A06	7941996	7943959	-	1632	Bra025822	GO:0003824;GO:0008152
Bra026404	8.24039113	6.993765857	8.826886004	4.356195987	5.060618521	5.161148248	8.838179742	11.84107747	10.13869889	9.848784602	13.0765291	11.15069905	8.587004666	12.01519371	9.504789783	7.930027012	2.590110285	3.962053837	5.592606094	8.420818516	6.822783504	14.72406057	9.84520872	9.443067975	3.795247881	4.007159948	4.642785529	1.740655641	2.403194883	1.0229993	8.466096482	10.8315292	5.361473473	1.153185982	9.152809128	4.403189377	8.333390894	1.231620658	1.297608844	1.154860272	1.453682674	0.073146876	A01	9308624	9310583	+	1266	Bra026404	GO:0016020;GO:0016772
Bra026626	11.06392135	7.874574371	9.149331434	2.030696478	4.250150054	2.457338786	4.041178274	14.11094515	9.168652668	8.871762154	6.530797194	14.82962997	7.661133127	3.784975749	2.811776357	0.883417968	0.575529552	0.79534252	3.879842447	6.223006118	2.882318674	12.61365388	7.938297456	9.976363109	2.088054983	3.244401711	3.96209402	0.253077237	0	0.055775931	7.52791504	13.97919436	5.098991363	0.56586568	4.400529585	3.227936308	5.152833907	1.112010242	0.970260788	0.178953868	0	0	A02	19871141	19874083	+	1290	Bra026626	GO:0004437
Bra026696	0	4.647262535	0.653958198	8.976146028	8.342113343	6.401931722	1.655589422	1.045675508	2.450074976	6.901880755	5.523204795	5.153616018	0.686309843	0	0.899601067	1.413205827	1.288946392	0.296872642	1.907392057	0	2.085523848	8.767033137	10.05753937	10.20741467	4.170819286	3.633054	5.98957182	0.850181343	0	0.74948907	7.493063581	2.608964226	0.364455832	0	2.133633062	1.399206263	1.905721256	0	1.629734918	0	0.766817611	0	A09	35011779	35011970	-	192	Bra026696	-
Bra027054	71.8509256	39.9130697	38.22085815	3.236116228	3.698888013	2.754405007	6.89419246	11.27563924	8.803762859	15.14632664	15.09300796	22.01276687	7.240718689	6.378220247	3.184613965	1.184871261	0.382743907	1.700859853	5.663871609	9.371466768	4.600381989	24.22951031	17.50387161	16.0941362	2.914109545	4.753690347	3.743119119	1.098924356	0.849672284	0.864039802	12.11978494	14.46892824	7.18089395	2.463166803	9.860233141	6.54999613	6.54658248	1.634129348	2.191957881	0.812065043	0.750074868	0.40438404	A09	8461893	8466476	+	2748	Bra027054	GO:0004672;GO:0004674;GO:0005515;GO:0005524;GO:0006468
Bra027059	5.373606227	10.83734097	11.09270446	3.023543925	5.635389465	3.323836335	5.258052421	12.91500978	7.410753097	7.095303251	12.6244681	13.6396454	8.42148619	5.804797009	6.349064169	5.100291708	1.550612201	1.92855611	5.736517464	6.518715882	3.297412572	13.90616005	8.212855112	12.27959659	4.196477094	5.403640126	5.123911064	3.886543282	1.773296451	1.893446072	6.76065887	9.572740919	4.472119684	1.995807865	7.700329849	6.648859835	6.724951198	1.875767522	2.254670864	4.435723704	3.505451935	1.740675661	A09	8528432	8540230	+	798	Bra027059	GO:0016021;GO:0055085
Bra027085	1.002269337	0.307098402	0.632013292	0.115665774	0.103361239	0.108545646	0.426675395	0.823440221	0.563775642	0.943271073	0.856693958	0.737877909	0.515883909	0.210059315	0.28980437	0.030350729	0.103807763	0.063757883	0.170683853	0.790196482	0.159963478	1.220367526	0.883639822	0.913415183	0.203578733	0.319194494	0	0	0.079143768	0.080482048	0.683930636	0.840471697	0.469634361	0.074228872	0.392768502	0.450751011	0.170534341	0.174410711	0.087502546	0.172148017	0	0	A09	8764628	8767089	+	1788	Bra027085	GO:0004672;GO:0004674;GO:0005524;GO:0005529;GO:0006468;GO:0048544
Bra027257	511.7853957	767.0602995	527.246124	377.2858883	361.8359809	127.0509148	545.242377	566.3912083	710.1098171	381.5582571	351.1455544	310.6210269	424.808449	601.7964288	472.3739165	276.8210023	664.7799181	940.0466848	1019.2589	1104.361175	566.6601694	476.6152611	415.6720175	546.7538407	847.2279528	754.7022841	334.2051338	1529.712568	1631.355914	1867.780878	1953.714888	861.7681978	2103.981151	2483.372199	1146.717183	757.0463574	216.7064209	655.515289	715.0594331	976.554059	1210.076946	1005.270986	A05	20688505	20689335	+	831	Bra027257	GO:0005488
Bra027405	2.425341079	5.201923667	3.304209841	4.063643036	7.522086979	7.445393391	9.681189852	13.61946486	15.37394415	7.608580507	9.508956091	13.70247043	10.49548357	8.478141361	6.141276614	5.217258398	4.949554144	8.719930738	5.653911612	5.993999493	12.36386349	9.40618916	5.954319956	11.0942062	6.28376831	6.274579769	8.383999479	3.551073231	3.723922548	4.392794888	8.934886763	15.95038339	9.477386186	1.909322858	6.365606008	4.241804249	6.76163275	10.11038694	9.936236467	8.208017427	4.3393805	4.87389185	A05	21463468	21467073	+	1425	Bra027405	GO:0004497;GO:0005506;GO:0009055;GO:0020037
Bra028383	0.536445346	0.531036695	0.566679444	0.266680083	0.31774751	0.375395772	0.491873376	0.474632855	0.909892448	1.669946882	0.22790787	0.680503263	0.892070047	0.201797794	1.262109556	0.104965384	0.678130403	0.477752491	0.590295414	0.455471086	0.221287968	1.205867442	1.773230081	1.305706686	0.328561111	0.245312596	0	0.420979543	0.775517075	0.463900392	2.550830155	1.251495412	0.406047503	0.513428329	0.264124789	0.346418572	0.66841545	0.040212295	0.100873341	0.396906065	0.522088586	0.059705961	A01	17764950	17767864	+	1551	Bra028383	GO:0004553;GO:0005975
Bra028683	6.353827324	3.382088052	3.093506604	0.649404652	2.187363499	1.078220079	3.777623169	4.170578257	3.116617113	1.484040763	2.518794844	1.625256298	2.052961616	1.950507291	1.585383909	1.101071671	0.134498754	0.867384415	1.946092765	2.326863157	1.82386185	2.213640573	2.544199681	3.408388897	3.112453285	2.527341913	4.259251072	1.419433199	1.230513538	0.886352292	1.563769791	1.951051508	2.586051817	0.913660593	1.696304546	0.681352615	3.712013576	6.056146518	2.550889436	0.223043952	1.386939679	1.073668929	A02	1189464	1191990	-	1380	Bra028683	GO:0016491
Bra029753	155.5246218	115.1581227	152.7756684	47.93672137	24.61244851	22.01918686	71.28403582	82.05642977	72.98922831	146.3344278	103.1602211	133.9034432	49.44325671	79.09969936	74.57360827	37.25896053	28.95938607	80.84118565	35.72086073	88.18688684	32.63952162	156.6801157	142.4692204	89.20813998	34.41675579	43.09281498	24.40273901	28.01863013	28.18575239	19.72644695	136.8715389	71.89553438	66.28612505	26.74639762	67.84771005	47.84350975	19.3988357	11.29004362	20.43899538	13.43359618	27.12566761	9.493667488	A05	23136065	23139959	+	1707	Bra029753	GO:0005507;GO:0016491;GO:0055114
Bra029909	8.567204381	5.134225842	2.883595202	1.357023652	2.506170938	5.17885235	1.001175336	0.702606115	0.440958376	0.237144077	1.855564865	0.865699279	5.620175089	5.42184594	0.982241584	9.543033996	5.683543145	4.862166104	5.847333129	1.685601657	2.252084246	0.327261663	0.153586857	1.457436635	3.439358495	1.664391238	6.875169053	3.320393277	3.528441049	5.759853013	1.038408811	2.05430254	3.397761458	1.480486084	2.073632132	2.291613407	4.721787048	10.06748061	6.467609437	10.5023845	9.853908195	12.88191363	A01	14214763	14218665	-	762	Bra029909	GO:0016020
Bra030170	12.2941803	6.950153337	2.455540559	0.119837986	0.40158604	0.084345769	0.663099179	1.250629725	0.730139684	0.890037485	0.563282077	1.31875233	0.572670534	0.29925008	0.025021499	0.047168278	0.02688806	0.222944774	0.23873486	0.697755575	0.621500867	1.463077238	1.627580153	1.192417672	0.094914935	0.220472164	0.305422176	0.425644897	0.368993629	0.031269427	0.969115916	1.11569787	0.699451088	0.057679801	0.839305835	0.175128815	0.132514299	0.189737023	0.339970778	0.100326158	0	0.040245087	A07	8193452	8198965	+	2301	Bra030170	GO:0004672;GO:0004674;GO:0004713;GO:0005515;GO:0005524;GO:0006468
Bra030606	6.694252219	5.36746767	5.461797498	0.202160708	0.66240106	0.505909715	1.864358763	3.009255811	0.525529279	3.29729947	2.245995303	2.708293227	2.576177708	2.080470165	2.082361022	0.371329156	0.241913692	0.334308195	0.954628283	4.331650241	0.615085375	4.570626595	2.402440755	1.851902407	0.426978034	0.495900733	0.749428341	0.478694481	0.207491286	0	0.070316139	1.65259904	0.478815873	0.713554963	0.800894522	0.262607627	1.192240082	0.243868114	0.076468501	0.225660303	0	0	A08	20352477	20354062	+	1023	Bra030606	GO:0004601;GO:0006979;GO:0020037;GO:0055114
Bra030638	1.063157081	0.988122267	1.251428312	0	0	0	0.985653238	1.259905817	0.223262646	0.266819914	0.913398209	0.365261822	1.38630028	1.871691304	2.104050335	0.841350446	0	0	0.811116888	0.28448028	0.506781305	0.897523264	0.388814569	2.387382035	1.128678369	0.842701743	1.98104701	0.813462547	0.156709919	0.478079407	0.079660477	0.138682484	0	0.293956197	0.648089777	0.223129238	1.215609572	2.624620448	0.779673848	0.76694515	0.489132828	1.743374383	A08	20217534	20219090	-	903	Bra030638	GO:0006629;GO:0016491;GO:0055114
Bra031080	12.42145171	7.224893982	7.985173781	49.51053178	35.46242514	47.52680613	17.35754805	16.58404665	19.60059981	18.09679739	8.333256357	11.79002682	34.24324899	30.6124599	38.13045924	55.39766843	85.40965827	60.06202293	11.17664819	8.379769028	14.17528992	6.562457553	12.19095681	10.17159918	19.47712738	19.95572245	14.71122903	46.53624193	51.20393504	68.47963295	40.77804075	17.37020919	16.03605661	2.983316966	4.620197909	6.3332494	18.25480361	12.51488644	15.35381844	93.0658226	34.38571602	48.84045791	A09	34304091	34305499	+	912	Bra031080	-
Bra031136	32.10950619	14.11507536	17.23789473	66.83364484	61.2552573	110.3073966	33.76279988	16.10694748	21.33760212	28.79009488	11.1171399	12.96964248	91.94225417	73.77330611	64.01500199	90.07726038	310.7453131	147.3615414	14.00047322	29.31689825	29.28014887	6.974001501	24.99352772	13.72983776	12.66797993	15.47714591	6.930306829	200.2162653	124.7997953	150.7311443	85.42600487	39.4793773	64.59886966	8.323195344	24.070274	20.64184968	12.81678295	8.456850185	6.452645369	280.063815	75.44445537	89.36019114	A09	34082154	34083443	+	885	Bra031136	GO:0005351;GO:0009401
Bra031919	21.9972525	17.78147483	16.15581703	5.3577825	16.91696799	11.06153242	24.37576634	24.04150666	29.71282636	23.51125842	13.32946143	22.21662449	24.01017646	17.51437563	16.20835635	7.966673265	5.770205608	16.73561836	15.70715946	19.74337361	12.64590035	19.59669967	13.84589498	17.03703892	17.0997697	17.74258308	11.69638895	12.96856929	12.22012581	12.17822655	40.12865553	36.11996068	25.25886637	4.355273295	12.43224239	13.10759027	12.217681	15.9424041	18.644843	17.94174794	15.63831148	13.11489379	A02	26203978	26204720	-	579	Bra031919	GO:0055085
Bra032477	16.36491501	10.72889277	12.93293727	0	1.020344489	0.200910574	2.632490013	2.771148343	0.626106116	1.995348925	2.62247405	2.321794711	4.024077587	2.52723536	1.609224268	0.056177126	0	0	0.18955449	2.193899548	0.414514057	2.516967416	1.817285487	1.555415568	0.376810325	1.050323912	0.396824634	0	0	0	0.968047966	0.972284805	0.507068984	0.480873997	0.908734578	0.347628885	1.641366547	0.129128924	0.161961234	0	0	0	A09	37999362	38000789	-	966	Bra032477	GO:0004601;GO:0006979;GO:0020037;GO:0055114
Bra033032	5.975295709	4.03464861	2.387897153	0.238370683	0.596435809	0.402654801	1.187078225	2.823179241	1.533656891	2.665984871	3.014972096	2.691570413	0.683462084	0.865804645	0.716694626	0.187645587	0.128359807	0.630700385	0.548737964	1.154742048	0.791188656	3.794062596	2.306670666	2.981751006	0.503456119	0.263125752	0.574380331	0.507992172	0.048931209	0.199034442	1.840619768	2.814650202	1.161419415	0.734280625	1.578407861	0.975380299	0.885646393	0.517587304	1.081981688	0	0.305454318	0.064041456	A02	22278201	22280203	+	1446	Bra033032	GO:0006629;GO:0016788
Bra033328	14.00587003	15.9500793	12.20721969	2.381962653	3.9232453	2.454484734	7.149992693	7.299891891	7.466895166	5.794927227	4.909515373	6.167579494	2.45509212	2.035696776	2.379432631	1.728017532	0.880256072	1.312997701	2.439807726	6.309015146	1.743992068	5.110802817	4.717801171	7.125826607	1.430347486	1.159999503	1.774687947	0.88474156	0.239683362	0.048747257	5.945715492	7.0420823	5.97351998	0.629436695	4.599329807	2.912169132	1.859240249	0.633834046	0.211998038	0.364939799	0.099748632	0.1254796	A10	2877532	2879761	+	1476	Bra033328	GO:0004650;GO:0005975;GO:0006364
Bra033561	15.54693155	10.46656196	12.51917629	5.66049983	12.7963841	11.73078151	15.59846832	16.32194184	28.1158164	14.6317664	23.49656624	17.63614756	21.99411719	15.11400385	14.71722722	8.832329206	2.933203519	2.925196707	9.695443495	12.58689671	18.89989606	14.01658822	11.84060086	16.95448583	6.938393054	6.880622665	5.589486378	4.747053598	3.389024333	2.672664837	13.00848575	23.59544185	8.139869845	2.205533521	11.29833343	6.893450209	14.575135	2.316747081	2.255820766	2.068552779	1.439188478	1.176785227	A06	25164052	25166653	-	2046	Bra033561	-
Bra033968	17.48840164	20.32582835	9.250842143	24.85275247	50.23444945	39.42675999	29.55902145	19.33976104	29.32278574	37.91591144	19.89091207	22.17750641	77.66788812	124.2102667	54.77399341	103.3326397	278.3681649	165.372077	42.17546728	47.59184147	34.28902975	21.31625161	43.95023055	34.67308352	108.418519	78.20067228	39.85050359	753.3555399	663.7159411	985.9030133	93.23557912	48.90968128	73.77962527	229.4615137	84.30924806	72.92687062	42.22576654	132.2335598	191.1476216	709.2845532	574.3825921	744.5410182	A02	9548647	9549923	+	699	Bra033968	GO:0008171
Bra034065	1.528605705	1.710566799	1.89057074	0.715854637	1.471314503	2.216901098	2.904760009	3.752704626	5.861861625	3.252543069	2.141221658	3.493541575	4.173448015	6.175263973	1.853383713	1.183394786	0.192739647	1.006222537	1.140870015	2.667556517	2.673034572	6.344390428	4.557367031	2.781335003	1.889920945	1.316994936	2.521052036	0.08475328	0.661257275	0.224146264	2.76379666	3.121003934	1.671274096	0.826923508	2.552383476	1.604074469	3.609590416	0.841952764	1.705890755	0.239720135	0	0	A01	25151061	25152023	+	963	Bra034065	GO:0008146
Bra034122	8.428254322	10.30959666	9.559092666	4.680893929	7.225078223	4.792089242	10.5957723	8.812935966	14.51896282	11.77425224	9.334140339	7.872519612	8.13404258	10.17534237	7.58182298	6.141338904	5.092133893	5.864150952	6.028300821	6.474999452	8.474509606	12.31473516	8.909933864	6.452094209	12.88226114	10.43840431	8.676252184	12.59527916	9.89981056	9.03088065	13.46901305	8.760966289	6.911162446	33.58993917	15.77458518	17.82692424	10.66576505	11.29320117	11.26730314	12.9833609	24.84110383	18.29213731	A01	24890011	24891239	+	486	Bra034122	GO:0005506;GO:0019825;GO:0020037
Bra034545	7.945082846	10.09824262	11.83438835	6.497491635	13.73682749	9.369360691	14.03026402	34.92315811	18.69298583	12.87774115	21.53415019	23.35358137	13.17714898	12.95124328	22.5003669	5.863342246	1.280057106	0.786200652	4.209416953	15.64935828	12.49259606	34.68296532	27.30774325	21.17510573	13.72317217	13.2657721	19.97441882	0.75050491	0.162654088	1.157831391	12.5676763	24.3263423	7.5605734	3.966381379	12.64624286	5.558226258	48.50608217	6.308615827	5.215151737	1.592072346	2.199973283	1.915943693	A08	12113869	12114303	+	435	Bra034545	GO:0009055;GO:0015035;GO:0045454
Bra034587	2.213327594	1.318664608	1.809221527	0.132443423	0.17753112	0	0.793919539	1.414323838	0.839218765	0.057862244	0.509344534	0.316840946	0.443035749	0.661454788	0.387148202	0.156389348	0	0.054754608	0.117265218	0.987072786	0.05494999	0.898319118	0.786966664	0.627545186	0	0.3045788	0.429607457	0	0.067967847	0	0.138200596	0.300745156	0.268878078	0	0.168652757	0.129033431	0.175743747	0	0.075146279	0	0	0	A08	11880028	11881513	+	1041	Bra034587	GO:0030528;GO:0045449
Bra034861	10.61446253	4.282736827	3.144153699	0.169795078	1.972519411	0.371800027	2.609796134	2.362642855	2.813879213	2.027601332	1.596197116	1.408147299	2.163735465	1.798783789	1.7489781	0.623759813	0.152387751	1.123143788	1.052354238	2.583620471	1.549833345	2.763990743	2.01781354	1.769955647	0.717238964	0.989205926	0.681899802	0.536074935	0	0.05907303	1.122113955	1.285204052	0.976669816	0.544832607	1.441441055	1.819657406	1.201637048	0.051206297	0.513808053	0	0	0	A05	22498265	22500969	-	1218	Bra034861	GO:0016491
Bra035966	2.286536916	1.77721499	1.481533616	0.655249834	0.646117848	0.233243282	0.916841655	1.250286546	1.828177872	1.046356464	2.143387243	1.491862887	1.036550559	0.615513037	0.622732695	0.302373243	0.365011368	0.728607782	0.500135577	0.715676298	0.749956602	1.512096906	1.208307223	0.856472683	1.503239775	0.727455168	1.591460578	0.187257248	0.139143615	0.518820359	2.876393335	1.662348887	1.14676368	0.391508033	0.690531054	0.506300791	0.279830588	1.267418796	0.794836302	0.226991632	0.096511951	0.910559933	Scaffold000111	68981	74528	+	3051	Bra035966	GO:0004672;GO:0004674;GO:0005515;GO:0005524;GO:0006468
Bra037155	7.827246254	5.681320436	9.550423074	1.130954238	4.915401151	2.170912912	13.03730373	20.81058013	6.063720235	2.515389529	5.096230723	4.27969187	11.00552338	8.822491227	6.053691293	2.549461251	0.461367836	0.467557807	1.183408047	5.938446286	4.777575885	8.647175613	3.141830479	3.702376207	2.008643496	2.317115587	4.24019402	0.730357127	0	0.107309397	2.843005779	8.264638353	2.295990209	0.346401402	1.440151175	0.751251685	7.685414281	0.697642842	0.291675153	0.459061377	0.05489522	0	A09	4700638	4702074	-	1341	Bra037155	GO:0008152;GO:0016758
Bra037176	15.46400768	9.679505399	21.23622833	17.74408796	8.869902945	11.73920087	19.74951642	23.4297313	35.78807742	15.68237994	14.23468954	15.02782233	20.40248905	18.82868948	13.57031352	9.205070856	5.674414884	10.1744754	18.96105713	18.11373473	16.30340199	26.80640945	14.42716782	13.46492885	5.241007989	4.440182188	6.426680612	3.461093278	2.232884526	0.709575451	17.30942025	26.30576947	13.52584011	2.944997553	9.061177096	5.629942359	9.983423383	1.906752834	1.851533161	0.075887735	0.435588702	0	A09	4782677	4784206	-	1014	Bra037176	GO:0004601;GO:0006979;GO:0020037;GO:0055114
Bra038556	3.973983885	3.81313849	5.744573971	13.29173624	11.27380627	12.89635781	4.778485549	6.342397851	4.611905838	7.676958273	5.775900439	8.838619889	14.21065086	10.02381084	12.60617442	12.59138682	11.52469715	6.519556058	5.186111736	5.036974364	7.8513839	4.685937828	3.8246139	8.11255963	3.092800041	2.901262374	2.087868173	5.867918289	3.930807134	4.232408868	12.22397823	7.571111871	9.833161274	1.301188461	2.868750336	1.097416677	5.181568904	1.222926865	2.300802237	10.05884489	6.01425577	4.842036348	A09	5694621	5695086	-	306	Bra038556	-
Bra038862	8.303924483	4.357872561	11.74146064	2.854525942	9.26812911	7.098840275	16.67243675	23.73950414	13.91346925	5.487209544	10.77450579	10.15216119	18.55167972	13.30578617	12.71485841	8.726180247	1.152846462	3.933716167	3.833213022	8.908561802	9.158786779	11.53072252	5.128783485	9.512831446	6.280172085	5.776781515	8.597867071	2.985315855	1.07425785	1.241389764	9.33297526	14.38981511	8.885780288	1.648710845	2.625233226	2.920082635	12.2050333	2.539535498	2.537392667	2.283545221	6.909296567	0.830815243	A01	15360742	15362190	-	1449	Bra038862	GO:0008152;GO:0016758
Bra039137	156.9383754	132.1252487	143.0206578	4.883023439	10.65223704	4.919379113	41.05861768	52.70204559	20.51062766	56.72091093	56.21395102	65.69142551	31.08983587	29.01663099	22.31010645	9.157573761	1.997866907	10.15304435	8.64684399	34.11763104	12.09603832	64.9409862	44.00935407	39.06037346	6.445811624	10.56888436	6.255775012	6.206323804	0.663323704	0.824437977	48.55505201	28.11158953	21.72156759	4.769668953	20.97056495	9.864404152	8.067553316	1.299359794	1.38527468	1.442815563	0.383408805	0.192924886	A05	25167193	25168405	-	960	Bra039137	GO:0004601;GO:0006979;GO:0020037;GO:0055114
Bra039775	7.9570124	7.791169456	5.542737588	26.20840561	27.08325197	11.30674029	10.53849786	6.993779252	5.933154537	6.945971394	11.03977511	6.061766732	11.39645317	9.812608647	5.809315716	11.44009215	18.28213693	10.37289058	3.849151538	10.06714201	9.379220767	9.21108907	10.43809491	20.59874671	2.623414588	6.169943304	4.719710647	9.117620457	11.0912504	10.24166686	8.424633648	7.446124925	8.195331144	2.271804719	7.697554955	6.050621677	3.626020984	4.495082531	2.819000939	5.684606664	7.427768424	4.671910746	A01	8914744	8916394	+	555	Bra039775	GO:0008152;GO:0016491;GO:0055114
Bra039872	5.722244097	2.801489503	5.796014346	0.401963857	1.676280232	0.754439706	2.965580586	5.137935245	1.632703025	1.053666397	3.091706474	1.538572246	3.77770549	3.102508716	1.678555926	2.320459248	0.180377338	0.664717752	0.593163711	2.309225127	1.445360968	1.696417599	1.13734874	1.142754295	0.778228671	0.431383035	1.986822658	0.634537679	0.206281424	0.069923179	0.908779723	1.703813372	0.408020523	0.193471171	0.739351398	0.261076387	2.311312077	0.363669213	0.684203581	0	0.286159342	0.089994116	A08	6158863	6160274	-	1029	Bra039872	GO:0004601;GO:0006979;GO:0020037;GO:0055114
Bra039945	3.871424252	6.271803077	1.858352253	0.887217522	1.347819916	0.999122854	3.518287329	1.980996586	2.335206596	3.255924091	1.81974315	1.528176487	2.543851154	4.914360652	2.519346101	1.815887642	1.592520638	1.980679248	1.963852825	2.314285518	0.883443086	2.24660709	2.259327902	4.456055411	3.091881478	2.285164187	1.726723408	0.945375393	1.00167286	0.926009662	2.221881402	1.772886887	1.981288848	1.024874309	1.882963541	0.777937073	1.569706054	1.043501302	2.214929309	0.891314634	1.989580828	1.072632569	A09	33187966	33188834	+	777	Bra039945	GO:0008152;GO:0016491
Bra040939	5.174634336	10.07642129	9.172111572	16.37860177	25.38405422	18.03151027	23.04016871	24.20627558	10.43776622	9.355586137	14.70765457	19.04133192	16.54152744	8.523938839	20.13064741	14.20181652	5.835910471	10.14672792	10.95194758	7.879649789	15.82208974	17.86291638	7.345699931	14.27011049	15.02463025	13.53716678	19.16662982	3.125773108	4.114802362	2.65351024	8.264689703	13.23355471	9.975233669	4.188719451	5.810745361	7.144883044	21.40895368	8.714004406	9.265216383	2.565005446	7.518075639	6.567655684	Scaffold000320	14773	17063	-	1410	Bra040939	GO:0004185;GO:0006508
[truncated: 3 more columns]
