# Supplementary material for: Effects of Exogenous Ergothioneine on Brassica rapa Clubroot Development Revealed by Transcriptomic Analysis
Source: Int J Mol Sci. 2023 Mar 28;24(7):6380. doi: 10.3390/ijms24076380 (PMC10094275; doi:10.3390/ijms24076380)
Supplement: Supplementary file 1 [file ijms-24-06380-s001.zip › Table S4 12 modules.xlsx]

## Sheet: brown
fromNode	toNode	weight
Bra035002	Bra015986	0.433964
Bra015986	Bra006403	0.430457
Bra015986	Bra013985	0.42761
Bra026364	Bra015986	0.426767
Bra015986	Bra023742	0.4247
Bra008101	Bra015986	0.424541
Bra015986	Bra018346	0.424365
Bra016561	Bra015986	0.422841
Bra019035	Bra015986	0.421766
Bra025683	Bra015986	0.421374
Bra015986	Bra002400	0.420932
Bra015986	Bra003975	0.419078
Bra015986	Bra006401	0.416836
Bra015986	Bra019382	0.416462
Bra015986	Bra031867	0.412818
Bra007205	Bra015986	0.412515
Bra015986	Bra010122	0.411436
Bra016860	Bra015986	0.410547
Bra010396	Bra015986	0.410545
Bra015986	Bra031069	0.410025
Bra009184	Bra015986	0.407253
Bra035505	Bra015986	0.407103
Bra015986	Bra034592	0.406871
Bra015986	Bra020179	0.405412
Bra005891	Bra015986	0.4054
Bra022772	Bra003780	0.404883
Bra015986	Bra024318	0.404765
Bra015986	Bra032309	0.40424
Bra015986	Bra017743	0.40414
Bra032845	Bra015986	0.403537
Bra022981	Bra026963	0.402998
Bra010396	Bra022772	0.402674
Bra015986	Bra020715	0.402592
Bra015986	Bra001752	0.402309
Bra015986	Bra014774	0.402043
Bra028533	Bra015986	0.401462
Bra022981	Bra019777	0.401277
Bra015986	Bra038517	0.40081
Bra035002	Bra003975	0.400256
Bra015986	Bra033077	0.400173
Bra015986	Bra026130	0.3992
Bra015986	Bra014598	0.397482
Bra035002	Bra023742	0.39684
Bra015986	Bra004633	0.396589
Bra002400	Bra022772	0.396557
Bra006403	Bra003975	0.39649
Bra015727	Bra015986	0.396275
Bra018346	Bra020715	0.393843
Bra015986	Bra007669	0.393427
Bra018346	Bra013985	0.393347
Bra015986	Bra029880	0.392651
Bra013985	Bra003975	0.392421
Bra006403	Bra023742	0.392071
Bra035002	Bra018346	0.391907
Bra026364	Bra022772	0.391807
Bra018346	Bra023742	0.391549
Bra016860	Bra022772	0.39095
Bra016561	Bra003975	0.390911
Bra022981	Bra034624	0.390867
Bra022772	Bra032309	0.390324
Bra015986	Bra002528	0.390313
Bra013985	Bra023742	0.390167
Bra018346	Bra006403	0.390122
Bra007205	Bra018346	0.3899
Bra019035	Bra023742	0.389291
Bra023742	Bra003975	0.389031
Bra013815	Bra022772	0.388869
Bra022772	Bra031069	0.388821
Bra008101	Bra006403	0.388699
Bra015986	Bra022437	0.38834
Bra018346	Bra020179	0.388148
Bra003975	Bra019382	0.388133
Bra008101	Bra003975	0.387944
Bra022772	Bra025325	0.38791
Bra018346	Bra006401	0.387526
Bra008101	Bra023742	0.387155
Bra015986	Bra000544	0.386902
Bra016561	Bra023742	0.386717
Bra015986	Bra023560	0.386682
Bra026364	Bra003975	0.386655
Bra015986	Bra022772	0.386604
Bra015986	Bra003780	0.386595
Bra008101	Bra018346	0.385721
Bra015986	Bra025325	0.385469
Bra006403	Bra019382	0.384711
Bra007205	Bra023742	0.384599
Bra015986	Bra013815	0.384534
Bra019035	Bra018346	0.3845
Bra018346	Bra004633	0.384126
Bra015986	Bra016956	0.383765
Bra031656	Bra015986	0.383696
Bra015986	Bra004841	0.383576
Bra019035	Bra003975	0.383421
Bra016561	Bra006403	0.383351
Bra018346	Bra003975	0.383333
Bra018346	Bra031867	0.383016
Bra007205	Bra003975	0.382812
Bra018346	Bra034592	0.382752
Bra010396	Bra002400	0.382747
Bra023742	Bra034592	0.38245
Bra014598	Bra022772	0.382365
Bra023742	Bra020179	0.382348
Bra019777	Bra026963	0.382235
Bra015986	Bra020368	0.382019
Bra034624	Bra026963	0.381846
Bra026364	Bra002400	0.381785
Bra002984	Bra022772	0.381749
Bra018346	Bra001752	0.381667
Bra023742	Bra004633	0.381338
Bra023742	Bra006401	0.38133
Bra015986	Bra006941	0.381127
Bra032845	Bra023742	0.380773
Bra022772	Bra001907	0.380407
Bra006401	Bra003975	0.380381
Bra015986	Bra001422	0.380141
Bra025683	Bra018346	0.380106
Bra006403	Bra006401	0.379959
Bra026364	Bra023742	0.379937
Bra015986	Bra025792	0.379882
Bra016561	Bra018346	0.379809
Bra018346	Bra002400	0.379766
Bra009184	Bra023742	0.379764
Bra018346	Bra014774	0.379376
Bra033077	Bra023742	0.379182
Bra018346	Bra031069	0.378795
Bra022772	Bra039058	0.378741
Bra027519	Bra006403	0.378537
Bra026364	Bra034592	0.378313
Bra003975	Bra024318	0.378242
Bra002400	Bra034592	0.378215
Bra032845	Bra003975	0.377775
Bra034321	Bra022772	0.377757
Bra002400	Bra003975	0.377706
Bra007205	Bra034592	0.377553
Bra013985	Bra006401	0.377358
Bra008101	Bra006401	0.377342
Bra003588	Bra026963	0.377235
Bra016860	Bra002400	0.377218
Bra003975	Bra020179	0.377037
Bra035148	Bra015986	0.376975
Bra034592	Bra003975	0.37695
Bra035002	Bra034592	0.376871
Bra022772	Bra010122	0.376797
Bra033077	Bra003975	0.376714
Bra023742	Bra019382	0.376677
Bra006403	Bra022437	0.376462
Bra013985	Bra006403	0.376412
Bra035002	Bra006403	0.376321
Bra026364	Bra018346	0.376307
Bra001752	Bra023742	0.376274
Bra034592	Bra031069	0.375895
Bra009184	Bra003975	0.375847
Bra002400	Bra023742	0.375472
Bra035505	Bra018346	0.375433
Bra001752	Bra003975	0.375193
Bra002400	Bra010122	0.375191
Bra018346	Bra026130	0.375165
Bra006403	Bra027849	0.375097
Bra034592	Bra022772	0.374873
Bra015986	Bra001907	0.374867
Bra023742	Bra024318	0.37483
Bra035002	Bra019382	0.374735
Bra022981	Bra016763	0.374593
Bra034624	Bra019777	0.374285
Bra002400	Bra003780	0.373959
Bra022981	Bra017656	0.373948
Bra034592	Bra032309	0.373933
Bra008101	Bra035002	0.373917
Bra022772	Bra016191	0.373865
Bra023742	Bra020715	0.373672
Bra035505	Bra023742	0.37349
Bra032845	Bra035002	0.373148
Bra013985	Bra034592	0.372983
Bra003975	Bra010122	0.372851
Bra023742	Bra017743	0.372827
Bra032988	Bra022772	0.372756
Bra018346	Bra022772	0.372746
Bra008101	Bra013985	0.372717
Bra015986	Bra030674	0.372555
Bra028533	Bra003975	0.37245
Bra018346	Bra038517	0.372413
Bra038517	Bra022772	0.372411
Bra006401	Bra022437	0.372347
Bra022981	Bra017077	0.372092
Bra015986	Bra027519	0.371984
Bra015986	Bra032988	0.371965
Bra015727	Bra005891	0.371959
Bra022772	Bra000423	0.371864
Bra015986	Bra017278	0.371817
Bra016860	Bra003975	0.371725
Bra025683	Bra003975	0.37157
Bra003975	Bra017743	0.371382
Bra035236	Bra015986	0.371319
Bra016561	Bra035002	0.371289
Bra022772	Bra003975	0.370899
Bra002528	Bra022772	0.370888
Bra015986	Bra035384	0.37074
Bra024662	Bra038219	0.370685
Bra009184	Bra018346	0.37043
Bra023742	Bra031069	0.370383
Bra023742	Bra022772	0.370376
Bra005891	Bra018346	0.370195
Bra010396	Bra003975	0.370071
Bra024662	Bra016191	0.369898
Bra018346	Bra033077	0.36989
Bra003975	Bra032309	0.369774
Bra006403	Bra034592	0.369758
Bra018346	Bra024318	0.369708
Bra003975	Bra007669	0.369649
Bra033482	Bra026963	0.369502
Bra006403	Bra003546	0.36947
Bra029880	Bra006403	0.369459
Bra006403	Bra027782	0.369185
Bra025683	Bra034592	0.369024
Bra032845	Bra006403	0.368761
Bra031867	Bra034592	0.368725
Bra035002	Bra002400	0.368616
Bra003975	Bra031069	0.368581
Bra016561	Bra006401	0.368524
Bra018346	Bra004841	0.368512
Bra015986	Bra018864	0.368392
Bra023742	Bra010122	0.368143
Bra006401	Bra020368	0.368076
Bra038517	Bra034592	0.368049
Bra018346	Bra010122	0.36804
Bra010396	Bra034592	0.36786
Bra018346	Bra032309	0.367769
Bra006401	Bra034592	0.367501
Bra019035	Bra034592	0.367492
Bra005891	Bra023742	0.367458
Bra005891	Bra034592	0.367421
Bra025683	Bra023742	0.367357
Bra034592	Bra020179	0.367327
Bra003975	Bra004633	0.367212
Bra014427	Bra022772	0.367168
Bra009184	Bra006403	0.367141
Bra016860	Bra023742	0.366963
Bra016860	Bra034592	0.366846
Bra006401	Bra014774	0.366694
Bra019035	Bra005891	0.366627
Bra006403	Bra017743	0.36647
Bra034592	Bra014598	0.366455
Bra005891	Bra022772	0.366423
Bra028533	Bra018346	0.366222
Bra000544	Bra023742	0.366182
Bra032845	Bra018346	0.366074
Bra018346	Bra014598	0.366041
Bra024662	Bra032988	0.366032
Bra028533	Bra023742	0.365988
Bra035505	Bra003975	0.365981
Bra023742	Bra032309	0.36594
Bra015986	Bra027849	0.365842
Bra035002	Bra009184	0.365797
Bra018346	Bra017743	0.365752
Bra022981	Bra012655	0.365724
Bra016561	Bra027519	0.365544
Bra024662	Bra022772	0.365315
Bra001752	Bra034592	0.365179
Bra031867	Bra023742	0.364997
Bra022772	Bra007669	0.36473
Bra029880	Bra003975	0.364553
Bra002400	Bra031069	0.364496
Bra035505	Bra034592	0.364448
Bra022437	Bra003975	0.364414
Bra015986	Bra024662	0.364393
Bra016860	Bra018346	0.364303
Bra018346	Bra020368	0.364288
Bra000544	Bra003975	0.363942
Bra006401	Bra026130	0.363883
Bra025683	Bra002400	0.363876
Bra029880	Bra023742	0.363767
Bra035002	Bra013985	0.363668
Bra023742	Bra014774	0.363641
Bra003975	Bra014774	0.363632
Bra033482	Bra019777	0.363402
Bra022772	Bra015174	0.363329
Bra038219	Bra016191	0.3632
Bra002984	Bra015986	0.363194
Bra018346	Bra019382	0.36315
Bra005891	Bra026364	0.363093
Bra024662	Bra029712	0.363069
Bra016561	Bra013985	0.362805
Bra006403	Bra024318	0.362789
Bra010396	Bra023742	0.362611
Bra015986	Bra011686	0.362537
Bra010880	Bra006403	0.362365
Bra031867	Bra022772	0.362304
Bra019777	Bra003588	0.36223
Bra005891	Bra003975	0.362114
Bra039217	Bra015986	0.362044
Bra006403	Bra006941	0.362026
Bra008101	Bra034592	0.361887
Bra022772	Bra027981	0.361884
Bra007205	Bra022772	0.361674
Bra025683	Bra022772	0.361646
Bra022981	Bra016237	0.361603
Bra035002	Bra005891	0.361543
Bra022772	Bra004540	0.361532
Bra024662	Bra001422	0.361213
Bra035002	Bra006401	0.361203
Bra015986	Bra039058	0.361196
Bra015986	Bra014427	0.361025
Bra023742	Bra004841	0.360913
Bra016561	Bra034592	0.360846
Bra003975	Bra020715	0.360816
Bra023742	Bra026130	0.360794
Bra003975	Bra016956	0.360634
Bra024662	Bra031069	0.360616
Bra034592	Bra010122	0.360497
Bra025792	Bra003975	0.360421
Bra010880	Bra000544	0.360407
Bra022772	Bra017278	0.360318
Bra024662	Bra004841	0.360276
Bra013985	Bra019382	0.360239
Bra030095	Bra000544	0.360171
Bra013985	Bra022437	0.359997
Bra022981	Bra026565	0.359943
Bra035002	Bra029880	0.359925
Bra006403	Bra006709	0.359854
Bra034592	Bra004841	0.359665
Bra018346	Bra001422	0.359589
Bra003975	Bra004841	0.359579
Bra002400	Bra032309	0.359501
Bra002400	Bra006403	0.359173
Bra010396	Bra018346	0.359102
Bra006401	Bra012088	0.359101
Bra015986	Bra016191	0.359034
Bra003975	Bra026130	0.359008
Bra031867	Bra003975	0.358962
Bra003975	Bra023560	0.358907
Bra035236	Bra003975	0.358883
Bra016561	Bra019382	0.358871
Bra022772	Bra001422	0.358864
Bra024662	Bra014427	0.358838
Bra007205	Bra024662	0.358835
Bra018346	Bra011686	0.358787
Bra034155	Bra022772	0.358732
Bra006401	Bra006941	0.358639
Bra028523	Bra015986	0.358502
Bra006401	Bra024318	0.358484
Bra006403	Bra025792	0.358454
Bra002400	Bra031867	0.358445
Bra018346	Bra000544	0.358444
Bra035148	Bra018346	0.358329
Bra024662	Bra032309	0.358291
Bra023742	Bra007669	0.358263
Bra034592	Bra025325	0.358223
Bra025683	Bra006401	0.358192
Bra006403	Bra000544	0.358192
Bra016561	Bra027849	0.357988
Bra034624	Bra033482	0.357834
Bra022772	Bra038219	0.35783
Bra022981	Bra010367	0.357719
Bra035002	Bra017743	0.357642
Bra016561	Bra002400	0.357533
Bra034592	Bra014774	0.357489
Bra006401	Bra020715	0.357415
Bra014598	Bra003975	0.357026
Bra013985	Bra002400	0.356881
Bra033077	Bra006403	0.356876
Bra035384	Bra022772	0.356848
Bra034592	Bra004633	0.356723
Bra006401	Bra019382	0.356717
Bra033077	Bra006401	0.356706
Bra019035	Bra002400	0.356669
Bra006401	Bra017743	0.356653
Bra035236	Bra023742	0.356542
Bra039217	Bra023742	0.356458
Bra013985	Bra017743	0.356424
Bra019035	Bra035002	0.356413
Bra015986	Bra039176	0.3564
Bra024126	Bra022772	0.356302
Bra034592	Bra001422	0.356249
Bra005891	Bra002400	0.356161
Bra002400	Bra014598	0.356027
Bra003588	Bra013363	0.356011
Bra019035	Bra032845	0.355972
Bra013815	Bra034592	0.355962
Bra032309	Bra031069	0.355883
Bra024662	Bra039099	0.355819
Bra015986	Bra034321	0.35579
Bra015727	Bra018346	0.355787
Bra038517	Bra003975	0.355643
Bra035002	Bra022772	0.355554
Bra032988	Bra016191	0.355518
Bra034592	Bra020715	0.355408
Bra015986	Bra014666	0.355355
Bra038517	Bra023742	0.355355
Bra028291	Bra012655	0.355318
Bra002400	Bra019382	0.355264
Bra007444	Bra010917	0.355083
Bra028533	Bra034592	0.355062
Bra006401	Bra006709	0.355056
Bra039176	Bra024662	0.354803
Bra022981	Bra013363	0.354539
Bra008101	Bra016561	0.354313
Bra002559	Bra006403	0.354263
Bra024662	Bra022398	0.354195
Bra013985	Bra024318	0.354189
Bra010922	Bra000544	0.354092
Bra002559	Bra000544	0.354086
Bra035148	Bra022772	0.35408
Bra034592	Bra024318	0.354043
Bra006403	Bra016956	0.353942
Bra023742	Bra022437	0.353858
Bra015727	Bra023742	0.353755
Bra035002	Bra016956	0.353709
Bra019777	Bra012655	0.353652
Bra023742	Bra020368	0.353595
Bra002528	Bra002400	0.353578
Bra035384	Bra024662	0.353515
Bra026963	Bra017656	0.353438
Bra034592	Bra007669	0.353159
Bra035148	Bra034592	0.353061
Bra006401	Bra023044	0.352796
Bra013985	Bra020368	0.352722
Bra023742	Bra016956	0.352721
Bra007205	Bra002400	0.3527
Bra024662	Bra014598	0.352689
Bra034592	Bra019382	0.352636
Bra003975	Bra020368	0.35263
Bra000544	Bra006401	0.352579
Bra003588	Bra026565	0.352474
Bra028291	Bra026963	0.352365
Bra008101	Bra027849	0.352336
Bra010880	Bra015986	0.352289
Bra005891	Bra031867	0.352282
Bra022772	Bra033436	0.352161
Bra024662	Bra038517	0.352036
Bra032845	Bra000544	0.352007
Bra008101	Bra027519	0.351977
Bra031656	Bra003975	0.351933
Bra035505	Bra002400	0.351883
Bra014427	Bra016191	0.351881
Bra022772	Bra021503	0.351862
Bra035002	Bra024318	0.351851
Bra019035	Bra006403	0.351731
Bra023742	Bra011686	0.351686
Bra034592	Bra026130	0.351662
Bra008101	Bra019382	0.351474
Bra023742	Bra014598	0.35147
Bra005891	Bra009184	0.351263
Bra006401	Bra020179	0.351139
Bra008101	Bra024318	0.351047
Bra015986	Bra025924	0.35099
Bra005891	Bra031069	0.350958
Bra007205	Bra020179	0.350862
Bra023742	Bra023560	0.35085
Bra034624	Bra003588	0.350797
Bra008101	Bra002400	0.350762
Bra018346	Bra032988	0.350711
Bra035148	Bra023742	0.350673
Bra019777	Bra016763	0.350637
Bra011135	Bra022772	0.350571
Bra038281	Bra024662	0.350311
Bra034592	Bra032988	0.350295
Bra006401	Bra027849	0.35024
Bra016191	Bra031069	0.350225
Bra016561	Bra003546	0.350214
Bra018346	Bra022437	0.350183
Bra035002	Bra027519	0.350177
Bra026364	Bra032309	0.35012
Bra030095	Bra006403	0.350106
Bra035002	Bra033077	0.350083
Bra023742	Bra025792	0.350081
Bra034592	Bra001907	0.350065
Bra018346	Bra024662	0.349992
Bra018346	Bra017278	0.349902
Bra008101	Bra000544	0.349899
Bra016561	Bra027782	0.349873
Bra024662	Bra039280	0.349856
Bra013985	Bra000544	0.349851
Bra033482	Bra017656	0.349755
Bra013815	Bra025325	0.349742
Bra002528	Bra025325	0.349725
Bra000544	Bra006709	0.349702
Bra009184	Bra034592	0.34968
Bra038517	Bra002400	0.349523
Bra035002	Bra027849	0.349479
Bra018346	Bra025325	0.349411
Bra034592	Bra023560	0.349379
Bra018346	Bra035384	0.349346
Bra033077	Bra034592	0.349343
Bra007205	Bra001752	0.349277
Bra002400	Bra007669	0.34927
Bra009184	Bra013985	0.349214
Bra035384	Bra034592	0.349149
Bra015986	Bra022030	0.349047
Bra013815	Bra002400	0.349006
Bra008101	Bra032845	0.348962
Bra035148	Bra024662	0.348853
Bra002400	Bra025325	0.348763
Bra034592	Bra017743	0.348745
Bra015986	Bra006709	0.348737
Bra026565	Bra016306	0.348721
Bra013985	Bra033077	0.348663
Bra013985	Bra006709	0.348631
Bra023742	Bra030674	0.348588
Bra002400	Bra006401	0.34858
Bra008101	Bra005891	0.348579
Bra015986	Bra029242	0.34854
Bra029712	Bra016191	0.348519
Bra035002	Bra000544	0.34847
Bra009184	Bra000544	0.348466
Bra005891	Bra006403	0.348396
Bra006401	Bra025792	0.348373
Bra024662	Bra034592	0.348373
Bra007205	Bra032309	0.348368
Bra008101	Bra029880	0.348333
Bra013985	Bra006941	0.348317
Bra004633	Bra020179	0.348294
Bra019035	Bra009184	0.348244
Bra038517	Bra025325	0.348229
Bra010396	Bra005891	0.348134
Bra024662	Bra025325	0.348108
Bra024662	Bra029242	0.34807
Bra008101	Bra003546	0.348061
Bra005891	Bra013985	0.34803
Bra005891	Bra002528	0.348006
Bra032845	Bra005891	0.347992
Bra031656	Bra023742	0.34799
Bra018346	Bra002528	0.347966
Bra027519	Bra006401	0.347962
Bra035505	Bra022772	0.347899
Bra000544	Bra027849	0.347877
Bra017278	Bra025325	0.347732
Bra022772	Bra023560	0.347709
Bra009184	Bra006401	0.347701
Bra031656	Bra018346	0.347668
Bra038517	Bra031867	0.347567
Bra013985	Bra020179	0.347493
Bra003780	Bra003975	0.347469
Bra016191	Bra032309	0.347391
Bra025325	Bra031069	0.347227
Bra039099	Bra016191	0.347131
Bra022772	Bra021208	0.347086
Bra005891	Bra016860	0.347016
Bra003588	Bra017656	0.346936
Bra025683	Bra006403	0.346879
Bra028523	Bra003975	0.346869
Bra025683	Bra013985	0.346788
Bra000544	Bra032810	0.346709
Bra016561	Bra029880	0.346607
Bra029880	Bra018346	0.346579
Bra039217	Bra018346	0.346563
Bra002528	Bra034592	0.346513
Bra005891	Bra004633	0.34651
Bra018346	Bra007669	0.346477
Bra003975	Bra027849	0.346412
Bra010880	Bra013985	0.346409
Bra008101	Bra009184	0.346361
Bra024318	Bra019382	0.34624
Bra020179	Bra020715	0.346127
Bra013985	Bra027849	0.346044
Bra003975	Bra006941	0.346036
Bra016191	Bra022398	0.345913
Bra013985	Bra014774	0.345855
Bra022772	Bra006077	0.345758
Bra022772	Bra022436	0.345715
Bra034624	Bra017656	0.345612
Bra013985	Bra027519	0.345595
Bra011529	Bra017656	0.345579
Bra016561	Bra024318	0.345382
Bra024662	Bra001752	0.345322
Bra001752	Bra022772	0.345292
Bra016561	Bra032845	0.345167
Bra015986	Bra039316	0.345113
Bra019035	Bra006401	0.344989
Bra016191	Bra039280	0.344978
Bra028533	Bra006403	0.344965
Bra034592	Bra017278	0.344949
Bra015986	Bra032810	0.344877
Bra007205	Bra031069	0.344865
Bra016561	Bra022437	0.344761
Bra001752	Bra006401	0.344677
Bra001752	Bra020179	0.344587
Bra007205	Bra004841	0.344554
Bra034592	Bra030674	0.344503
Bra035002	Bra022437	0.344401
Bra005891	Bra038517	0.344398
Bra000544	Bra017743	0.344396
Bra006403	Bra020368	0.344386
Bra022981	Bra015531	0.344376
Bra034592	Bra003780	0.344363
Bra010880	Bra006401	0.344361
Bra008101	Bra019035	0.344322
Bra035002	Bra028533	0.344313
Bra029880	Bra006401	0.344301
Bra007205	Bra013985	0.344249
Bra027519	Bra003975	0.344231
Bra032845	Bra013985	0.344138
Bra029880	Bra013985	0.34413
Bra020313	Bra000544	0.344086
Bra016763	Bra016237	0.343867
Bra034624	Bra012655	0.343849
Bra039217	Bra003975	0.343821
Bra026364	Bra031069	0.343821
Bra034592	Bra016191	0.343647
Bra020179	Bra020368	0.343595
Bra025924	Bra022772	0.343529
Bra014427	Bra034592	0.343514
Bra005891	Bra025683	0.343488
Bra005891	Bra007205	0.343467
Bra024318	Bra027849	0.34342
Bra018346	Bra039176	0.343414
Bra022772	Bra029242	0.343372
Bra018346	Bra030674	0.34327
Bra015531	Bra016306	0.343137
Bra032845	Bra034592	0.343137
Bra003975	Bra001907	0.343024
Bra025683	Bra038517	0.342969
Bra031867	Bra025325	0.342879
Bra024662	Bra025924	0.34286
Bra035505	Bra006401	0.342859
Bra010880	Bra035002	0.342828
Bra028291	Bra019777	0.342795
Bra005891	Bra035505	0.342761
Bra029880	Bra000544	0.342745
Bra015727	Bra019035	0.342716
Bra013985	Bra022772	0.342688
Bra005891	Bra032309	0.342646
Bra006401	Bra003546	0.342465
Bra006403	Bra020179	0.342314
Bra023742	Bra027849	0.342268
Bra013815	Bra003975	0.342258
Bra022772	Bra004841	0.342234
Bra010396	Bra032309	0.342221
Bra031867	Bra006401	0.342192
Bra034624	Bra010367	0.342071
Bra028533	Bra013985	0.34204
Bra015727	Bra003975	0.342018
Bra022772	Bra029712	0.342017
Bra024662	Bra021503	0.341973
Bra018346	Bra013815	0.34195
Bra011529	Bra034624	0.341921
Bra016191	Bra001422	0.341876
Bra016561	Bra005891	0.341843
Bra002400	Bra001752	0.341804
Bra019035	Bra022772	0.34175
Bra039176	Bra022772	0.341713
Bra015986	Bra004540	0.341693
Bra016561	Bra025792	0.341686
Bra014598	Bra016191	0.341669
Bra035002	Bra026364	0.341639
Bra019777	Bra010367	0.341539
Bra023742	Bra001422	0.34145
Bra031656	Bra034592	0.341421
Bra016191	Bra025325	0.341356
Bra008101	Bra022437	0.341337
Bra022437	Bra024318	0.341256
Bra005891	Bra017278	0.341223
Bra025917	Bra006401	0.341042
Bra003975	Bra018864	0.341015
Bra007669	Bra032309	0.340976
Bra034624	Bra016763	0.340922
Bra003546	Bra024318	0.340892
Bra006709	Bra024318	0.34088
Bra005891	Bra010122	0.340836
Bra024662	Bra002400	0.340788
Bra008101	Bra017743	0.340761
Bra024611	Bra006401	0.340756
Bra016561	Bra016956	0.340698
Bra033482	Bra016763	0.340685
Bra022772	Bra019826	0.340522
Bra035384	Bra025325	0.340493
Bra031867	Bra031069	0.340489
Bra025325	Bra032309	0.340488
Bra002559	Bra020313	0.340391
Bra006403	Bra032810	0.340274
Bra035148	Bra003975	0.34024
Bra024318	Bra017743	0.340178
Bra019035	Bra013985	0.340136
Bra007205	Bra006401	0.340136
Bra005891	Bra035148	0.340121
Bra034624	Bra017077	0.340051
Bra003588	Bra012655	0.339973
Bra001907	Bra032309	0.339955
Bra035002	Bra007205	0.339886
Bra028533	Bra006401	0.33983
Bra033077	Bra000544	0.339827
Bra024662	Bra017278	0.339791
Bra015727	Bra034592	0.339723
Bra018346	Bra023560	0.339705
Bra010880	Bra024318	0.339683
Bra002984	Bra002400	0.33954
Bra033077	Bra020179	0.339512
Bra038517	Bra031069	0.339506
Bra011529	Bra026963	0.339374
Bra019035	Bra016561	0.339263
Bra014598	Bra025325	0.339146
Bra016561	Bra000544	0.339118
Bra005891	Bra028533	0.339102
Bra035236	Bra018346	0.339075
Bra025325	Bra001422	0.339072
Bra028523	Bra023742	0.339051
Bra001752	Bra032309	0.33905
Bra016860	Bra032309	0.339034
Bra025917	Bra006403	0.339027
Bra003975	Bra011686	0.339015
Bra019777	Bra017077	0.338943
Bra002400	Bra014774	0.338908
Bra028291	Bra017741	0.338857
Bra034321	Bra025325	0.338805
Bra034592	Bra020368	0.338769
Bra026963	Bra016306	0.338766
Bra024662	Bra023742	0.33874
Bra039176	Bra034592	0.33873
Bra002984	Bra034592	0.338695
Bra038517	Bra001422	0.338634
Bra002400	Bra026130	0.338511
Bra028291	Bra026565	0.338493
Bra010367	Bra016237	0.338431
Bra024662	Bra020179	0.338348
Bra006403	Bra014774	0.338236
Bra032845	Bra024318	0.338218
Bra010880	Bra003975	0.338211
Bra019777	Bra017656	0.338196
Bra005891	Bra020715	0.338192
Bra005891	Bra006401	0.338175
Bra003975	Bra001422	0.33811
Bra001752	Bra031069	0.338046
Bra026364	Bra025325	0.338016
Bra009184	Bra024318	0.337985
Bra000544	Bra024318	0.337969
Bra003975	Bra025325	0.337967
Bra003975	Bra030674	0.337912
Bra007205	Bra004633	0.337849
Bra018346	Bra025792	0.337837
Bra006403	Bra022772	0.337827
Bra002400	Bra001907	0.337806
Bra016191	Bra000423	0.337765
Bra018346	Bra016191	0.337728
Bra035002	Bra032309	0.337724
Bra002400	Bra039058	0.33772
Bra002400	Bra020179	0.337658
Bra032845	Bra006401	0.337599
Bra010880	Bra008101	0.337567
Bra029880	Bra024318	0.337554
Bra002400	Bra032988	0.33754
Bra035384	Bra016191	0.337465
Bra015986	Bra012088	0.337435
Bra015986	Bra015174	0.337414
Bra023742	Bra032810	0.337363
Bra005891	Bra017743	0.33734
Bra019777	Bra013363	0.337313
Bra035148	Bra016191	0.337309
Bra033482	Bra026565	0.337263
Bra019035	Bra029880	0.337174
Bra007205	Bra006403	0.337119
Bra018346	Bra022030	0.337105
Bra018346	Bra006941	0.337075
Bra006401	Bra022772	0.337075
Bra003780	Bra032309	0.33702
Bra034624	Bra013363	0.336885
Bra004841	Bra032309	0.336872
Bra033482	Bra013363	0.336797
Bra003588	Bra015531	0.336746
Bra035002	Bra020179	0.336729
Bra005891	Bra020179	0.336713
Bra013985	Bra003546	0.336687
Bra000544	Bra003546	0.336608
Bra016561	Bra009184	0.336585
Bra008101	Bra020179	0.336507
Bra020179	Bra014774	0.336496
Bra039176	Bra016191	0.336484
Bra015727	Bra002400	0.336454
Bra013985	Bra025792	0.336442
Bra010880	Bra023742	0.336375
Bra005891	Bra025325	0.336358
Bra000544	Bra034592	0.336342
Bra022981	Bra018051	0.336309
Bra013985	Bra012088	0.336287
Bra013985	Bra026130	0.336191
Bra023742	Bra001907	0.336166
Bra035002	Bra025683	0.33615
Bra025683	Bra025325	0.336104
Bra002400	Bra016191	0.336094
Bra030095	Bra035002	0.336053
Bra016191	Bra021503	0.336018
Bra006709	Bra003975	0.33598
Bra005891	Bra030674	0.335966
Bra022772	Bra020179	0.335835
Bra002559	Bra006401	0.335802
Bra010122	Bra031069	0.33571
Bra038517	Bra014598	0.335709
Bra002400	Bra020715	0.335677
Bra035236	Bra034592	0.335602
Bra023742	Bra025325	0.335594
Bra002400	Bra023560	0.335522
Bra014598	Bra032309	0.335441
Bra023742	Bra039316	0.3354
Bra038517	Bra032309	0.335365
Bra007205	Bra016191	0.335347
Bra035002	Bra025792	0.335318
Bra025683	Bra031069	0.335316
Bra014427	Bra003975	0.335263
Bra024662	Bra013815	0.335225
Bra006403	Bra026130	0.335193
Bra002559	Bra024318	0.335189
Bra030095	Bra008101	0.335157
Bra028291	Bra039700	0.335153
Bra006401	Bra004633	0.335107
Bra035002	Bra031069	0.335049
Bra000544	Bra020179	0.334748
Bra007195	Bra021503	0.334713
Bra016860	Bra031069	0.334674
Bra001422	Bra031069	0.334667
Bra019777	Bra016237	0.334664
Bra038281	Bra016191	0.334632
Bra024126	Bra016191	0.334627
Bra038521	Bra024662	0.334574
Bra005891	Bra031656	0.334498
Bra037811	Bra000544	0.33446
Bra006403	Bra012088	0.334443
Bra003975	Bra032810	0.334298
Bra013815	Bra032309	0.334289
Bra013985	Bra020715	0.334256
Bra032309	Bra010122	0.334207
Bra034592	Bra011686	0.334202
Bra020179	Bra024318	0.33418
Bra020433	Bra024662	0.334039
Bra010396	Bra031069	0.333952
Bra025917	Bra000544	0.33391
Bra032988	Bra025325	0.333823
Bra027782	Bra006401	0.333731
Bra020433	Bra022772	0.333729
Bra022772	Bra001067	0.333721
Bra020179	Bra004841	0.33371
Bra013985	Bra031069	0.333702
Bra007444	Bra022981	0.333693
Bra015986	Bra003546	0.333685
Bra011529	Bra019777	0.333654
Bra028291	Bra007444	0.333639
Bra023742	Bra014427	0.333625
Bra018346	Bra014427	0.333597
Bra009184	Bra002400	0.333538
Bra008101	Bra027782	0.333509
Bra038517	Bra016191	0.33346
Bra038517	Bra014774	0.333431
Bra000544	Bra019382	0.333426
Bra038517	Bra017278	0.333414
Bra032845	Bra002400	0.333392
Bra005891	Bra035384	0.333389
Bra014598	Bra031069	0.333302
Bra015986	Bra031895	0.333299
Bra014427	Bra032309	0.333137
Bra039099	Bra022772	0.33311
Bra022772	Bra019382	0.333067
Bra032988	Bra003975	0.332988
Bra025325	Bra021503	0.332846
Bra024662	Bra007195	0.332803
Bra024662	Bra003975	0.332773
Bra033077	Bra024318	0.332741
Bra035002	Bra032810	0.332736
Bra007205	Bra014774	0.332699
Bra010396	Bra025325	0.332698
Bra028523	Bra018346	0.332668
Bra013985	Bra002559	0.33263
Bra016561	Bra022772	0.332613
Bra013985	Bra027782	0.332561
Bra015986	Bra004165	0.332506
Bra033482	Bra010367	0.332449
Bra029880	Bra034592	0.332396
Bra015986	Bra023044	0.332395
Bra008101	Bra016956	0.332348
Bra013815	Bra023742	0.332319
Bra015986	Bra038219	0.332306
Bra035384	Bra038517	0.33223
Bra022772	Bra014774	0.332215
Bra000544	Bra024611	0.332205
Bra015986	Bra001067	0.332192
Bra035384	Bra023742	0.332182
Bra008101	Bra002559	0.332113
Bra016191	Bra004841	0.332112
Bra010396	Bra026364	0.332051
Bra022772	Bra030674	0.332012
Bra002400	Bra001422	0.331927
Bra024662	Bra028910	0.331914
Bra015986	Bra006077	0.331902
Bra023294	Bra015986	0.331812
Bra018346	Bra029242	0.331792
Bra028291	Bra012058	0.331756
Bra027519	Bra023742	0.331743
Bra039176	Bra023742	0.331726
Bra019777	Bra026565	0.331663
Bra034321	Bra002400	0.331639
Bra013985	Bra038517	0.331594
Bra015986	Bra027981	0.331577
Bra007205	Bra038517	0.331553
Bra005891	Bra019382	0.331549
Bra025792	Bra024318	0.331532
Bra028291	Bra013363	0.331505
Bra013985	Bra032309	0.331492
Bra006401	Bra022030	0.331492
Bra034592	Bra039058	0.33149
Bra022981	Bra010794	0.331471
Bra002400	Bra004540	0.331422
Bra013985	Bra001752	0.331223
Bra023742	Bra006941	0.331216
Bra023742	Bra003780	0.331205
Bra006401	Bra017839	0.331021
Bra019035	Bra019382	0.331
Bra020179	Bra031069	0.330997
Bra027519	Bra024318	0.330972
Bra000544	Bra012088	0.330964
Bra002400	Bra024318	0.330924
Bra022772	Bra005572	0.330915
Bra025924	Bra034592	0.330847
Bra022772	Bra031895	0.330817
Bra033077	Bra002400	0.330735
Bra002528	Bra023742	0.33069
Bra017278	Bra031069	0.330648
Bra035384	Bra031069	0.330617
Bra015986	Bra029712	0.330608
Bra023742	Bra006709	0.330548
Bra015727	Bra035002	0.330539
Bra034592	Bra022437	0.330446
Bra028523	Bra034592	0.330428
Bra015986	Bra012910	0.330405
Bra006403	Bra020715	0.330382
Bra016191	Bra029242	0.330371
Bra015986	Bra000423	0.330341
Bra018346	Bra016956	0.330313
Bra005891	Bra024318	0.330309
Bra035148	Bra002400	0.330278
Bra034321	Bra034592	0.330199
Bra010922	Bra006403	0.330156
Bra033482	Bra015531	0.330094
Bra013985	Bra023044	0.330087
Bra003588	Bra017077	0.330042
Bra034592	Bra018864	0.330005
Bra007205	Bra033077	0.329992
Bra023742	Bra032988	0.329948
Bra024662	Bra031867	0.329915
Bra034592	Bra029242	0.329915
Bra024662	Bra022436	0.329912
Bra005891	Bra011686	0.32989
Bra017278	Bra016191	0.329863
Bra005891	Bra013815	0.329808
Bra004165	Bra006403	0.329692
Bra032309	Bra001422	0.329683
Bra005891	Bra033077	0.329654
Bra007444	Bra026009	0.329641
Bra006403	Bra020313	0.329634
Bra026364	Bra019382	0.329629
Bra022436	Bra016191	0.329579
Bra008101	Bra006709	0.329563
Bra016561	Bra006941	0.329555
Bra011135	Bra016191	0.329471
Bra002400	Bra014427	0.329429
Bra004841	Bra031069	0.329427
Bra020433	Bra016191	0.329405
Bra039176	Bra003975	0.329359
Bra020179	Bra032309	0.329353
Bra033482	Bra016237	0.329201
Bra019035	Bra016956	0.329127
Bra028291	Bra019731	0.329108
Bra002400	Bra017278	0.329103
Bra007205	Bra020368	0.3291
Bra016561	Bra020179	0.328956
Bra002559	Bra006709	0.328842
Bra003780	Bra025325	0.328832
Bra015986	Bra021503	0.328821
Bra015986	Bra027782	0.328807
Bra019035	Bra017743	0.328767
Bra002400	Bra017743	0.328762
Bra028291	Bra017077	0.32876
Bra002528	Bra003975	0.328751
Bra000508	Bra014747	0.328748
Bra026364	Bra006403	0.328581
Bra025683	Bra032309	0.328544
Bra026364	Bra038517	0.328527
Bra038517	Bra032988	0.328516
Bra007205	Bra020715	0.328459
Bra022772	Bra018864	0.328447
Bra002984	Bra025325	0.328414
Bra005891	Bra001907	0.328408
Bra030095	Bra016561	0.328396
Bra038517	Bra006401	0.328334
Bra030095	Bra024318	0.32833
Bra002528	Bra038517	0.32833
Bra035002	Bra006709	0.328252
Bra006403	Bra024611	0.328195
Bra013815	Bra038517	0.32815
Bra022981	Bra033482	0.328149
Bra005891	Bra001752	0.328113
Bra000544	Bra022437	0.328099
Bra013815	Bra016191	0.32806
Bra039217	Bra034592	0.328024
Bra035148	Bra031069	0.328017
Bra025325	Bra001907	0.327985
Bra035002	Bra006941	0.327958
Bra018346	Bra001907	0.327922
Bra033077	Bra027849	0.327858
Bra000544	Bra023044	0.327832
Bra020179	Bra026130	0.327808
Bra028533	Bra002400	0.327776
Bra005891	Bra039316	0.327735
Bra018346	Bra023044	0.327672
Bra005891	Bra023560	0.327585
Bra018346	Bra012088	0.327474
Bra024662	Bra001067	0.327433
Bra024662	Bra000423	0.327391
Bra018346	Bra018864	0.327383
Bra016561	Bra017743	0.327381
Bra010880	Bra016561	0.327376
Bra032309	Bra000423	0.327368
Bra035002	Bra010122	0.327359
Bra020313	Bra006709	0.327286
Bra016495	Bra000544	0.32728
Bra022772	Bra026130	0.327275
Bra008101	Bra033077	0.327204
Bra006833	Bra016763	0.327088
Bra006401	Bra031069	0.327076
Bra018346	Bra027849	0.327028
Bra005891	Bra029880	0.326997
Bra008101	Bra025792	0.326978
Bra024318	Bra016956	0.326936
Bra022981	Bra026009	0.326923
Bra023742	Bra017278	0.326736
Bra018346	Bra025924	0.32673
Bra027981	Bra016191	0.326654
Bra033482	Bra012655	0.326569
Bra022723	Bra022772	0.32647
Bra035002	Bra004633	0.326461
Bra006403	Bra023044	0.326436
Bra027782	Bra024318	0.326433
Bra012088	Bra020179	0.326421
Bra026364	Bra003780	0.326397
Bra007444	Bra012655	0.326318
Bra002984	Bra003780	0.326248
Bra007205	Bra024318	0.326183
Bra034592	Bra016956	0.32616
Bra008101	Bra007205	0.326144
Bra032988	Bra031069	0.325891
Bra010396	Bra016860	0.325852
Bra034592	Bra025792	0.325838
Bra035505	Bra031069	0.325827
Bra007444	Bra016763	0.325823
Bra005891	Bra014598	0.325798
Bra018346	Bra003780	0.325756
Bra028533	Bra024318	0.325744
Bra013815	Bra031069	0.325737
Bra022981	Bra039061	0.325724
Bra002400	Bra006941	0.325708
Bra035384	Bra003975	0.325629
Bra008101	Bra006941	0.325626
Bra025924	Bra016191	0.325599
Bra010880	Bra018346	0.32559
Bra024662	Bra001907	0.325564
Bra005891	Bra024662	0.325554
Bra002984	Bra003975	0.32554
Bra000544	Bra020368	0.325397
Bra020433	Bra022436	0.325352
Bra013985	Bra024611	0.325296
Bra032988	Bra032309	0.325293
Bra022772	Bra039280	0.325292
Bra039217	Bra020179	0.325238
Bra038521	Bra016191	0.325213
Bra005891	Bra001422	0.325198
Bra023742	Bra016191	0.325122
Bra003588	Bra016763	0.325083
Bra016860	Bra025325	0.32497
Bra035002	Bra003546	0.324948
Bra002400	Bra004633	0.324945
Bra016561	Bra033077	0.324931
Bra019035	Bra020179	0.324923
Bra019777	Bra016306	0.324874
Bra026364	Bra016860	0.324865
Bra031867	Bra032309	0.324846
Bra020179	Bra017743	0.324818
Bra018346	Bra027519	0.324748
Bra006401	Bra000571	0.324742
Bra011529	Bra000985	0.324736
Bra001907	Bra031069	0.324711
Bra023742	Bra018864	0.324666
Bra010396	Bra016191	0.324658
Bra035384	Bra002400	0.324614
Bra020179	Bra011686	0.324609
Bra014774	Bra031069	0.324594
Bra013363	Bra016306	0.324551
Bra002984	Bra016191	0.324526
Bra025917	Bra006709	0.324507
Bra018346	Bra006709	0.324493
Bra028533	Bra022772	0.324459
Bra000544	Bra017839	0.324453
Bra028291	Bra022981	0.324446
Bra035002	Bra027782	0.324416
Bra026364	Bra006401	0.324405
Bra009184	Bra020179	0.324388
Bra008101	Bra022772	0.324331
Bra032845	Bra009184	0.324324
Bra022981	Bra003588	0.324277
Bra013363	Bra017656	0.324224
Bra011529	Bra022981	0.324223
Bra020179	Bra023044	0.324198
Bra006403	Bra031069	0.324161
Bra006403	Bra000571	0.32416
Bra002984	Bra010396	0.32414
Bra034155	Bra025325	0.324124
Bra029880	Bra002400	0.324041
Bra020433	Bra038219	0.324012
Bra022772	Bra040375	0.32395
Bra028533	Bra020179	0.323914
Bra013985	Bra025917	0.323893
Bra006403	Bra032309	0.323877
Bra035002	Bra038517	0.323787
Bra003975	Bra039058	0.323783
Bra000544	Bra016956	0.323771
Bra002984	Bra039058	0.32375
Bra003975	Bra016191	0.323739
Bra016561	Bra007205	0.323736
Bra035148	Bra032309	0.323725
Bra016860	Bra003780	0.32369
Bra024662	Bra011029	0.323626
Bra002984	Bra032309	0.323605
Bra003780	Bra031069	0.323532
Bra006401	Bra032810	0.323529
Bra022772	Bra005670	0.323525
Bra016561	Bra002559	0.323519
Bra003975	Bra039316	0.323454
Bra034624	Bra016237	0.323427
Bra002400	Bra004841	0.323426
Bra027920	Bra022772	0.323426
Bra020433	Bra011029	0.323335
Bra032845	Bra033077	0.323263
Bra026364	Bra010122	0.323238
Bra026364	Bra013985	0.323226
Bra002559	Bra011650	0.323221
Bra028533	Bra000544	0.323146
Bra002400	Bra022437	0.323104
Bra013985	Bra004633	0.3231
Bra024318	Bra020368	0.323083
Bra013985	Bra032810	0.322997
Bra033482	Bra017077	0.322972
Bra005891	Bra004841	0.322932
Bra019035	Bra000544	0.322916
Bra006709	Bra020179	0.322909
Bra038517	Bra020179	0.322872
Bra007205	Bra028533	0.322859
Bra002984	Bra005891	0.322836
Bra022772	Bra022398	0.322799
Bra007669	Bra031069	0.322781
Bra019035	Bra007205	0.322755
Bra038517	Bra020715	0.322749
Bra035384	Bra032309	0.322737
Bra013985	Bra016956	0.322736
Bra002528	Bra031069	0.322725
Bra035002	Bra031656	0.322711
Bra035002	Bra020368	0.322686
Bra013985	Bra031867	0.322673
Bra006004	Bra016191	0.322649
Bra005891	Bra039058	0.322646
Bra016191	Bra001907	0.322626
Bra015986	Bra034155	0.322622
Bra023294	Bra023742	0.322614
Bra010880	Bra033077	0.32254
Bra024662	Bra031195	0.322476
Bra019035	Bra031069	0.322446
Bra026364	Bra024662	0.322401
Bra023294	Bra006401	0.322336
Bra005891	Bra000544	0.322276
Bra027782	Bra019382	0.322223
Bra033077	Bra032810	0.32219
Bra015727	Bra006403	0.322157
Bra005891	Bra016956	0.322147
Bra016561	Bra026364	0.322147
Bra034592	Bra029712	0.322129
Bra002400	Bra016956	0.322072
Bra028291	Bra026009	0.322069
Bra006401	Bra032309	0.322059
Bra024662	Bra014774	0.322036
Bra022772	Bra038174	0.322034
Bra024662	Bra027981	0.322029
Bra014427	Bra031069	0.321971
Bra025924	Bra003975	0.321826
Bra006403	Bra001752	0.321818
Bra006403	Bra004633	0.321785
Bra016860	Bra016191	0.321746
Bra035002	Bra001752	0.321727
Bra034592	Bra038219	0.321723
Bra024318	Bra032810	0.321712
Bra038521	Bra020433	0.321679
Bra005891	Bra014774	0.321607
Bra019035	Bra033077	0.3216
Bra011029	Bra021503	0.321556
Bra035505	Bra038517	0.321526
Bra005891	Bra006925	0.321522
Bra035002	Bra014774	0.321463
Bra028291	Bra038111	0.321462
Bra025325	Bra029242	0.321434
Bra027782	Bra022437	0.321427
Bra025325	Bra039058	0.321377
Bra018346	Bra017272	0.321324
Bra034592	Bra006941	0.321308
Bra024662	Bra024126	0.321297
Bra038517	Bra026130	0.321286
Bra024662	Bra005670	0.321266
Bra016860	Bra024662	0.321253
Bra005891	Bra003712	0.32124
Bra030095	Bra015986	0.321221
Bra034624	Bra026565	0.3212
Bra035505	Bra007205	0.321186
Bra038517	Bra006403	0.321144
Bra002400	Bra030674	0.321143
Bra038517	Bra001752	0.321074
Bra006077	Bra025325	0.321019
Bra005891	Bra029242	0.320962
Bra024662	Bra006004	0.320895
Bra001752	Bra016191	0.32087
Bra004534	Bra024020	0.320854
Bra022437	Bra020179	0.32082
Bra015986	Bra033436	0.320785
Bra038521	Bra022772	0.320783
Bra032845	Bra020179	0.320748
Bra023742	Bra012088	0.3206
Bra020433	Bra021503	0.320589
Bra016561	Bra006709	0.320555
Bra026963	Bra016237	0.320528
Bra003712	Bra015986	0.320489
Bra035505	Bra013985	0.320447
Bra002984	Bra004540	0.320443
Bra002984	Bra024662	0.320442
Bra017272	Bra006401	0.320433
Bra010922	Bra008101	0.320401
Bra024318	Bra006941	0.320376
Bra027519	Bra000544	0.320347
Bra010880	Bra020313	0.320339
Bra035505	Bra020179	0.320339
Bra010396	Bra024662	0.320253
Bra016191	Bra001067	0.320248
Bra019777	Bra006833	0.320238
Bra030095	Bra013985	0.32019
Bra019035	Bra024318	0.320094
Bra002984	Bra023742	0.32009
Bra007195	Bra025325	0.320076
Bra018346	Bra032810	0.320054
Bra017741	Bra012655	0.319994
Bra016561	Bra032810	0.319867
Bra003588	Bra010794	0.319867
Bra002400	Bra025792	0.319865
Bra017278	Bra021503	0.319838
Bra011135	Bra039452	0.31982
Bra026364	Bra007205	0.319817
Bra005891	Bra039217	0.31981
Bra038219	Bra032309	0.319683
Bra022772	Bra020715	0.319607
Bra020433	Bra039099	0.319593
Bra024335	Bra022772	0.319583
Bra028291	Bra010917	0.319519
Bra000508	Bra033528	0.319484
Bra019035	Bra026364	0.319475
Bra007205	Bra000544	0.319447
Bra011529	Bra017077	0.319422
Bra008435	Bra016191	0.319359
Bra022772	Bra009268	0.319331
Bra022981	Bra017741	0.319276
Bra006403	Bra010122	0.319266
Bra003546	Bra003975	0.319184
Bra031656	Bra022772	0.319178
Bra035002	Bra020715	0.319159
Bra007205	Bra028523	0.319155
Bra015727	Bra022772	0.319099
Bra039176	Bra032309	0.319095
Bra028291	Bra034624	0.319082
Bra027519	Bra019382	0.319062
Bra006401	Bra010122	0.319047
Bra008101	Bra032810	0.318981
Bra005891	Bra001067	0.318962
Bra000544	Bra004633	0.318911
Bra007444	Bra003588	0.318783
Bra035505	Bra006403	0.318733
Bra020715	Bra031069	0.318688
Bra028291	Bra016763	0.318662
Bra031656	Bra002400	0.318583
Bra035002	Bra035236	0.318581
Bra006709	Bra003546	0.318536
Bra016860	Bra010122	0.318518
Bra004534	Bra022981	0.318508
Bra038517	Bra004841	0.318453
Bra005891	Bra003780	0.318449
Bra004534	Bra015531	0.318445
Bra018346	Bra029712	0.318395
Bra002984	Bra018346	0.318386
Bra025917	Bra024318	0.31838
Bra002400	Bra015174	0.318358
Bra024662	Bra008435	0.318238
Bra037811	Bra002559	0.318202
Bra019035	Bra032309	0.318162
Bra007444	Bra006833	0.318135
Bra035505	Bra024662	0.318118
Bra017278	Bra003975	0.318113
Bra006833	Bra012058	0.318093
Bra020313	Bra024318	0.318076
Bra005891	Bra035236	0.318073
Bra005891	Bra007669	0.318057
Bra030095	Bra010880	0.31805
Bra022772	Bra015711	0.31801
Bra006403	Bra014666	0.317987
Bra007205	Bra011686	0.317949
Bra023560	Bra032309	0.317863
Bra033482	Bra010794	0.317817
Bra019035	Bra027849	0.317812
Bra002559	Bra003546	0.317807
Bra008101	Bra026364	0.317805
Bra007444	Bra019777	0.317798
Bra005891	Bra026130	0.317784
Bra020433	Bra039280	0.31778
Bra006401	Bra021698	0.317743
Bra028533	Bra032309	0.3177
Bra022981	Bra000985	0.31767
Bra025924	Bra023742	0.317653
Bra025683	Bra007205	0.317643
Bra035505	Bra032309	0.317612
Bra034592	Bra001067	0.317591
Bra024335	Bra016191	0.31758
Bra037811	Bra006403	0.31757
Bra009184	Bra033077	0.317555
Bra011135	Bra024126	0.317545
Bra007205	Bra026130	0.317522
Bra022981	Bra012058	0.317495
Bra010922	Bra010880	0.317488
Bra024662	Bra011686	0.317444
Bra000508	Bra024020	0.317428
Bra002400	Bra018864	0.317359
Bra015986	Bra000571	0.317329
Bra003975	Bra012910	0.317257
Bra004534	Bra026565	0.31721
Bra029880	Bra033077	0.317202
Bra020433	Bra007195	0.317179
Bra035002	Bra002559	0.317174
Bra007444	Bra026565	0.317168
Bra023742	Bra022030	0.317141
Bra018346	Bra039316	0.317127
Bra027519	Bra002400	0.317098
Bra010880	Bra020179	0.317091
Bra004534	Bra033482	0.31702
Bra006833	Bra017077	0.317014
Bra002400	Bra000423	0.316981
Bra015986	Bra017272	0.316964
Bra028910	Bra021503	0.31689
Bra031656	Bra006403	0.316839
Bra033077	Bra019382	0.316812
Bra022772	Bra024318	0.316803
Bra026364	Bra025683	0.316792
Bra035002	Bra016860	0.316775
Bra017741	Bra019731	0.316766
Bra028910	Bra016191	0.31676
Bra007205	Bra025325	0.316747
Bra022772	Bra028290	0.316691
Bra008101	Bra025917	0.316651
Bra016191	Bra011029	0.316635
Bra038517	Bra029242	0.316629
Bra007205	Bra014598	0.316587
Bra018346	Bra038219	0.316586
Bra028523	Bra032309	0.316586
Bra030095	Bra033077	0.316528
Bra019035	Bra004633	0.316512
Bra024662	Bra031382	0.316461
Bra039058	Bra032309	0.316433
Bra010922	Bra035002	0.316425
Bra000544	Bra025792	0.316408
Bra016191	Bra021208	0.316388
Bra023294	Bra018346	0.316348
Bra006401	Bra016956	0.316297
Bra003975	Bra000571	0.31629
Bra035148	Bra011686	0.316289
Bra038219	Bra031069	0.316268
Bra006833	Bra026009	0.316246
Bra035002	Bra035505	0.316225
Bra028291	Bra003588	0.316108
Bra004633	Bra031069	0.316107
Bra038219	Bra025325	0.316106
Bra022772	Bra031048	0.316104
Bra033077	Bra006709	0.316101
Bra035002	Bra007669	0.316089
Bra014774	Bra032309	0.316004
Bra016191	Bra019826	0.315952
Bra034592	Bra027981	0.315946
Bra007205	Bra017743	0.315834
Bra002559	Bra025917	0.315803
Bra020433	Bra028910	0.315755
Bra014666	Bra006401	0.315726
Bra039452	Bra022772	0.315715
Bra016191	Bra005670	0.315677
Bra015727	Bra008101	0.315662
Bra023742	Bra023044	0.315631
Bra007205	Bra031867	0.315628
Bra004534	Bra003588	0.315594
Bra015986	Bra002559	0.315574
Bra007205	Bra001422	0.315559
Bra034592	Bra021503	0.315553
Bra034592	Bra000423	0.31555
Bra022772	Bra004633	0.315548
Bra001067	Bra025325	0.315439
Bra011135	Bra024662	0.315407
Bra027782	Bra003975	0.315355
Bra019382	Bra032309	0.315294
Bra007444	Bra026963	0.315269
Bra006403	Bra031867	0.315167
Bra034592	Bra039316	0.315151
Bra004534	Bra017656	0.315077
Bra015986	Bra006925	0.315076
Bra027981	Bra025325	0.315071
Bra039217	Bra007205	0.315009
Bra025325	Bra010122	0.315008
Bra008101	Bra025683	0.314919
Bra031867	Bra016191	0.314912
Bra013985	Bra000571	0.314901
Bra008101	Bra028533	0.314791
Bra007444	Bra012058	0.314766
Bra010922	Bra024318	0.314732
Bra035384	Bra021503	0.314705
Bra022436	Bra025325	0.314679
Bra015986	Bra003115	0.314633
Bra009184	Bra007205	0.314582
Bra031656	Bra013985	0.314422
Bra029712	Bra032309	0.314393
Bra026364	Bra016191	0.314379
Bra024662	Bra038174	0.31436
Bra012088	Bra024318	0.314357
Bra028533	Bra038517	0.31433
Bra038111	Bra017741	0.314305
Bra033077	Bra002559	0.314296
Bra006401	Bra014598	0.314239
Bra004534	Bra016306	0.31414
Bra015174	Bra025325	0.314119
Bra004534	Bra034624	0.314106
Bra005891	Bra016191	0.314086
Bra024662	Bra004633	0.314079
Bra026130	Bra031069	0.314036
Bra034624	Bra016306	0.314028
Bra035148	Bra025325	0.313979
Bra035002	Bra026130	0.313916
Bra004165	Bra003975	0.313814
Bra011529	Bra016237	0.313787
Bra017278	Bra032309	0.313766
Bra023742	Bra029242	0.31375
Bra008101	Bra038517	0.31373
Bra002400	Bra031895	0.313717
Bra006401	Bra004841	0.313705
Bra002984	Bra031069	0.313704
Bra010396	Bra035002	0.313651
Bra011529	Bra033482	0.313636
Bra006401	Bra018864	0.313564
Bra000544	Bra000571	0.313513
Bra024126	Bra025325	0.313436
Bra008101	Bra031069	0.313407
Bra031656	Bra006401	0.313395
Bra019035	Bra038517	0.313373
Bra003588	Bra016306	0.313361
Bra011135	Bra025325	0.313354
Bra027981	Bra032309	0.313296
Bra022436	Bra021503	0.313234
Bra033077	Bra022437	0.313109
Bra030674	Bra031069	0.313095
Bra024662	Bra006401	0.313087
Bra012088	Bra003975	0.313084
Bra023742	Bra039058	0.313067
Bra039217	Bra000544	0.313056
Bra020433	Bra011135	0.313033
Bra022772	Bra000551	0.313015
Bra024662	Bra030674	0.313006
Bra033482	Bra018051	0.312947
Bra024318	Bra000571	0.312929
Bra020433	Bra005670	0.312873
Bra028291	Bra015531	0.312823
Bra034321	Bra003975	0.312796
Bra035236	Bra032309	0.312736
Bra038219	Bra021503	0.312714
Bra006403	Bra017839	0.31268
Bra038517	Bra007195	0.31265
Bra016561	Bra032309	0.312589
Bra008435	Bra005104	0.312581
Bra016561	Bra031069	0.31257
Bra011529	Bra010794	0.312539
Bra033482	Bra003588	0.312505
Bra020433	Bra024126	0.312491
Bra016191	Bra005104	0.312442
Bra034592	Bra015174	0.312437
Bra007205	Bra039176	0.312392
Bra030095	Bra003975	0.312383
Bra024611	Bra024318	0.312373
Bra028533	Bra031069	0.312231
Bra033077	Bra017743	0.312213
Bra017656	Bra016306	0.312175
Bra025924	Bra032309	0.312154
Bra024318	Bra032309	0.312152
Bra030095	Bra019035	0.312135
Bra039176	Bra031069	0.312092
Bra032845	Bra007205	0.312088
Bra002400	Bra025924	0.312068
Bra003975	Bra004540	0.31202
Bra006833	Bra016237	0.312008
Bra013363	Bra026963	0.312002
Bra010880	Bra002559	0.311909
Bra007205	Bra019382	0.311857
Bra035148	Bra004633	0.311857
Bra032845	Bra026364	0.311815
Bra035384	Bra017278	0.311804
Bra007205	Bra035236	0.311787
Bra020433	Bra008435	0.311783
Bra002400	Bra014666	0.311776
Bra002984	Bra026364	0.311761
Bra013985	Bra014666	0.31173
Bra008101	Bra020368	0.311648
Bra007444	Bra017741	0.311602
Bra028523	Bra022772	0.311581
Bra018346	Bra001067	0.311573
Bra025683	Bra020179	0.311525
Bra035002	Bra031867	0.311524
Bra013985	Bra010122	0.311447
Bra020179	Bra016191	0.31144
Bra039176	Bra002400	0.311429
Bra038517	Bra020368	0.311427
Bra017272	Bra020179	0.31136
Bra002559	Bra030957	0.311353
Bra008101	Bra012088	0.311286
Bra034592	Bra004540	0.311228
Bra030095	Bra023742	0.311225
Bra028523	Bra024662	0.31116
Bra002559	Bra014929	0.311153
Bra035505	Bra025325	0.311149
Bra031867	Bra020179	0.311094
Bra008101	Bra020715	0.311088
Bra029242	Bra031069	0.311023
Bra035148	Bra038517	0.310986
Bra038174	Bra016191	0.310979
Bra035236	Bra022772	0.310932
Bra025683	Bra024662	0.310885
Bra010396	Bra038517	0.310863
Bra016860	Bra038517	0.31084
Bra016561	Bra037811	0.31084
Bra007205	Bra035148	0.310826
Bra004534	Bra019777	0.310822
Bra007195	Bra016191	0.310816
Bra014427	Bra025325	0.310765
Bra020179	Bra019382	0.310726
Bra013985	Bra017839	0.310664
Bra003588	Bra017741	0.310633
Bra004534	Bra026963	0.310627
Bra038521	Bra021503	0.310607
Bra035002	Bra023560	0.310581
Bra034592	Bra022030	0.31052
Bra017741	Bra010917	0.310477
Bra019035	Bra028533	0.310408
Bra003975	Bra031895	0.310358
Bra013985	Bra024662	0.310351
Bra016561	Bra004165	0.310296
Bra033077	Bra022772	0.310265
Bra015986	Bra021698	0.31004
Bra004633	Bra032309	0.310039
Bra010922	Bra016561	0.310005
Bra034321	Bra032309	0.30992
Bra002400	Bra000544	0.309918
Bra030095	Bra009184	0.309851
Bra019035	Bra020715	0.309831
Bra015986	Bra029642	0.30979
Bra024662	Bra010122	0.309787
Bra026963	Bra026565	0.30976
Bra024020	Bra016306	0.309759
Bra014598	Bra032988	0.309753
Bra006833	Bra010917	0.309741
Bra020433	Bra022398	0.309724
Bra020433	Bra010032	0.309723
Bra005891	Bra039176	0.30972
Bra019035	Bra032810	0.3097
Bra019777	Bra015531	0.309611
Bra024662	Bra020715	0.309605
Bra019035	Bra027519	0.309602
Bra002984	Bra001907	0.309502
Bra005572	Bra016191	0.309465
Bra030674	Bra032309	0.309419
Bra011529	Bra013363	0.309403
Bra020179	Bra032810	0.309398
Bra002400	Bra029242	0.309371
Bra003975	Bra029242	0.309323
Bra022772	Bra029642	0.309321
Bra002400	Bra027981	0.30925
Bra033339	Bra000508	0.309231
Bra024318	Bra031069	0.309195
Bra030095	Bra006401	0.309181
Bra024611	Bra006709	0.309167
Bra039452	Bra024126	0.309153
Bra014774	Bra020368	0.309142
Bra008101	Bra032309	0.309142
Bra035384	Bra007195	0.309133
Bra003780	Bra016191	0.309111
Bra008101	Bra020313	0.309105
Bra028523	Bra020179	0.309042
Bra007205	Bra022437	0.308994
Bra038174	Bra025325	0.308955
Bra000544	Bra027782	0.308918
Bra012655	Bra017656	0.308832
Bra020433	Bra032988	0.308794
Bra000423	Bra031069	0.308785
Bra026364	Bra009184	0.308783
Bra002400	Bra006077	0.30878
Bra033324	Bra013363	0.308771
Bra018346	Bra034321	0.30877
Bra002984	Bra016860	0.308752
Bra007205	Bra010122	0.308746
Bra023742	Bra031895	0.308717
Bra009184	Bra022772	0.308688
Bra025683	Bra014666	0.308652
Bra003588	Bra016237	0.30863
Bra008101	Bra026130	0.308629
Bra015986	Bra024611	0.308616
Bra002984	Bra000423	0.30853
Bra035002	Bra039217	0.308476
Bra023044	Bra024318	0.308432
Bra016561	Bra025917	0.308388
Bra011135	Bra021503	0.308372
Bra017077	Bra016237	0.30837
Bra004633	Bra024318	0.308358
Bra010880	Bra019035	0.308354
Bra024611	Bra020179	0.308351
Bra034321	Bra016191	0.308315
Bra035236	Bra020179	0.308308
Bra022772	Bra017743	0.308293
Bra006833	Bra026565	0.308281
Bra008101	Bra023044	0.308259
Bra018346	Bra014666	0.308193
Bra014774	Bra025325	0.308186
Bra019382	Bra031069	0.308178
Bra019777	Bra026009	0.308173
Bra016191	Bra031195	0.308167
Bra033077	Bra027519	0.308135
Bra031048	Bra021503	0.308113
Bra033077	Bra025792	0.308088
Bra002984	Bra013815	0.308024
Bra002400	Bra038219	0.307988
Bra024662	Bra034321	0.307857
Bra015986	Bra038174	0.307694
Bra032988	Bra021503	0.307666
Bra035002	Bra025325	0.307616
Bra024662	Bra005104	0.3076
Bra026364	Bra016956	0.307584
Bra010880	Bra037811	0.307575
Bra038517	Bra021503	0.307555
Bra002400	Bra020368	0.307482
Bra013985	Bra025325	0.307477
Bra006833	Bra012655	0.307468
Bra005891	Bra027981	0.307433
Bra023742	Bra012910	0.307432
Bra020433	Bra031048	0.307337
Bra034624	Bra006833	0.307284
Bra032309	Bra029242	0.307272
Bra002400	Bra034155	0.307269
Bra031048	Bra025325	0.307232
Bra007205	Bra032988	0.307221
Bra024126	Bra021208	0.30718
Bra038517	Bra010122	0.307177
Bra016191	Bra010122	0.307176
Bra019382	Bra027849	0.307096
Bra035236	Bra002400	0.307091
Bra020433	Bra029712	0.307049
Bra014774	Bra024318	0.307012
Bra034321	Bra038517	0.306993
Bra001422	Bra021503	0.306986
Bra005891	Bra014427	0.306895
Bra016860	Bra007205	0.306884
Bra023742	Bra003546	0.306847
Bra033077	Bra031069	0.306838
Bra006833	Bra039061	0.306818
Bra035384	Bra001422	0.306797
Bra002559	Bra003975	0.306783
Bra025924	Bra025325	0.306775
Bra025683	Bra024318	0.306755
Bra001067	Bra031069	0.306732
Bra011529	Bra004534	0.306712
Bra020433	Bra032293	0.306675
Bra027782	Bra006709	0.306674
Bra015727	Bra006401	0.306651
Bra009184	Bra029880	0.306635
Bra033077	Bra032309	0.306606
Bra020433	Bra029242	0.306602
Bra024126	Bra021503	0.306525
Bra029712	Bra031069	0.306461
Bra017743	Bra031069	0.306433
Bra033482	Bra016306	0.306392
Bra002528	Bra032309	0.306386
Bra034624	Bra010794	0.306378
Bra020433	Bra021208	0.30634
Bra006403	Bra007669	0.306335
Bra027981	Bra031069	0.306272
Bra038517	Bra025924	0.30624
Bra011650	Bra006709	0.306187
Bra031069	Bra021503	0.306167
Bra008101	Bra037811	0.306145
Bra018346	Bra021503	0.306138
Bra025924	Bra031069	0.306112
Bra015727	Bra026364	0.306089
Bra005891	Bra032988	0.306065
Bra015986	Bra025917	0.306065
Bra026364	Bra007669	0.306054
Bra025792	Bra020179	0.306047
Bra007205	Bra007669	0.30603
Bra039452	Bra000508	0.305981
Bra017741	Bra012058	0.305918
Bra020433	Bra025325	0.305897
Bra020433	Bra006004	0.305839
Bra001067	Bra021503	0.305782
Bra006833	Bra026963	0.305772
Bra035002	Bra024662	0.305696
Bra000544	Bra014929	0.305691
Bra016860	Bra006401	0.305622
Bra034592	Bra006077	0.305605
Bra018346	Bra012910	0.30553
Bra037811	Bra024318	0.305514
Bra033077	Bra003546	0.305504
Bra031656	Bra032309	0.305489
Bra020433	Bra028290	0.30547
Bra011529	Bra003588	0.305427
Bra032309	Bra004540	0.305384
Bra022981	Bra016056	0.305369
Bra003975	Bra000423	0.305325
Bra003975	Bra023044	0.305313
Bra014774	Bra026130	0.305224
Bra010922	Bra002559	0.30522
Bra039217	Bra006401	0.305166
Bra035505	Bra016191	0.305158
Bra020433	Bra015915	0.305147
Bra007205	Bra014427	0.305133
Bra034592	Bra031895	0.305132
Bra033528	Bra014747	0.305014
Bra006401	Bra001422	0.305009
Bra006401	Bra012910	0.304984
Bra017741	Bra039700	0.304913
Bra016561	Bra025683	0.304797
Bra015727	Bra013985	0.304774
Bra010922	Bra009184	0.304741
Bra035148	Bra004841	0.304732
Bra034592	Bra033436	0.304724
Bra018346	Bra039058	0.304709
Bra008101	Bra014774	0.304702
Bra022772	Bra006941	0.304686
Bra038517	Bra004633	0.304667
Bra017077	Bra017656	0.304581
Bra008101	Bra024611	0.304531
Bra005891	Bra020368	0.304527
Bra004534	Bra016237	0.304522
Bra023742	Bra029712	0.304481
Bra032845	Bra022772	0.304464
Bra006833	Bra017741	0.304416
Bra026963	Bra012655	0.304397
Bra007444	Bra033482	0.304375
Bra034592	Bra012910	0.304341
Bra006004	Bra005104	0.304331
Bra011529	Bra026565	0.304327
Bra029242	Bra021503	0.304306
Bra028291	Bra017656	0.304294
Bra030957	Bra006709	0.304275
Bra023560	Bra031069	0.304274
Bra017741	Bra026963	0.304205
Bra038174	Bra021503	0.304144
Bra024126	Bra028290	0.304097
Bra033077	Bra025917	0.304054
Bra003588	Bra010367	0.304052
Bra005891	Bra015174	0.303972
Bra029880	Bra020179	0.303927
Bra024318	Bra026130	0.303903
Bra032309	Bra018864	0.303897
Bra000544	Bra020715	0.30384
Bra002984	Bra015174	0.303832
Bra000508	Bra016237	0.303778
Bra031656	Bra038517	0.303747
Bra002984	Bra022723	0.303698
Bra020433	Bra005104	0.303661
Bra011529	Bra035641	0.303658
Bra007444	Bra016306	0.303648
Bra006401	Bra025325	0.303633
Bra000985	Bra017656	0.303623
Bra035236	Bra006403	0.303618
Bra032309	Bra017743	0.303615
Bra020433	Bra009268	0.303542
Bra002984	Bra027981	0.303466
Bra020179	Bra000571	0.303465
Bra035148	Bra035384	0.303457
Bra035148	Bra020179	0.303446
Bra012655	Bra016237	0.303417
Bra001752	Bra025325	0.303413
Bra010922	Bra033077	0.303376
Bra035148	Bra017278	0.30336
Bra034155	Bra034592	0.30335
Bra027519	Bra034592	0.303295
Bra006403	Bra023560	0.303291
Bra024318	Bra020715	0.303254
Bra005891	Bra022030	0.303227
Bra016763	Bra016306	0.303217
Bra024662	Bra026130	0.303217
Bra003975	Bra029712	0.30317
Bra026364	Bra039058	0.303152
Bra026963	Bra000985	0.303151
Bra023294	Bra003975	0.303124
Bra016561	Bra038517	0.303111
Bra030095	Bra002559	0.303092
Bra016860	Bra006403	0.303054
Bra023294	Bra020179	0.303003
Bra026364	Bra029880	0.302996
Bra027920	Bra016191	0.302976
Bra002559	Bra023742	0.30291
Bra001752	Bra024318	0.30289
Bra016561	Bra020313	0.302809
Bra025325	Bra009268	0.302796
Bra006709	Bra014665	0.30277
Bra034592	Bra027849	0.302739
Bra039061	Bra016237	0.302736
Bra022981	Bra016306	0.302666
Bra025325	Bra004841	0.302664
Bra038517	Bra022030	0.302663
Bra020368	Bra031069	0.302641
Bra015986	Bra036972	0.302601
Bra038219	Bra003975	0.302574
Bra013985	Bra020313	0.302537
Bra031048	Bra000508	0.302492
Bra003975	Bra021698	0.302446
Bra023742	Bra000571	0.30244
Bra034155	Bra016191	0.302435
Bra025325	Bra000423	0.302397
Bra016561	Bra028533	0.302369
Bra000544	Bra038475	0.302325
Bra038517	Bra024318	0.302298
Bra022772	Bra011686	0.302268
Bra033077	Bra016956	0.30226
Bra022981	Bra000508	0.302215
Bra024662	Bra024335	0.30221
Bra025325	Bra021208	0.30218
Bra034624	Bra015531	0.302147
Bra020433	Bra035384	0.302117
Bra035148	Bra039176	0.30211
Bra022772	Bra009294	0.302067
Bra002400	Bra021503	0.302005
Bra017272	Bra023742	0.302
Bra010880	Bra006709	0.301983
Bra000508	Bra033482	0.301963
Bra033436	Bra032309	0.30195
Bra024662	Bra007669	0.301898
Bra016860	Bra019382	0.301857
Bra011686	Bra031069	0.301848
Bra016191	Bra030674	0.301807
Bra006403	Bra018864	0.301704
Bra006403	Bra021698	0.30169
Bra006709	Bra000571	0.301669
Bra015986	Bra024126	0.301589
Bra031656	Bra007205	0.301576
Bra002559	Bra014665	0.301538
Bra035002	Bra004165	0.301476
Bra039099	Bra032309	0.301462
Bra026364	Bra017743	0.301461
Bra032293	Bra021503	0.301454
Bra031656	Bra031069	0.301452
Bra039452	Bra016191	0.301442
Bra034624	Bra000985	0.301417
Bra011135	Bra021208	0.301383
Bra016561	Bra026130	0.301363
Bra013985	Bra004841	0.301322
Bra003712	Bra022772	0.301293
Bra023742	Bra001067	0.301292
Bra019035	Bra035505	0.30129
Bra024662	Bra021208	0.301265
Bra028290	Bra016191	0.301256
Bra002984	Bra033436	0.301254
Bra020179	Bra001422	0.301215
Bra039058	Bra031069	0.301209
Bra023742	Bra038219	0.301194
Bra026364	Bra020179	0.301192
Bra004165	Bra006401	0.301176
Bra010396	Bra007205	0.301097
Bra006401	Bra023560	0.301091
Bra032309	Bra026130	0.301088
Bra013985	Bra018864	0.301057
Bra026364	Bra013815	0.301047
Bra034624	Bra018051	0.301041
Bra003546	Bra019382	0.301036
Bra017839	Bra024318	0.301021
Bra016561	Bra010122	0.300978
Bra029712	Bra025325	0.300915
Bra032309	Bra021503	0.300857
Bra022772	Bra016956	0.30084
Bra009184	Bra016956	0.300817
Bra015986	Bra022398	0.300813
Bra034321	Bra031069	0.300699
Bra008435	Bra010557	0.300684
Bra019035	Bra025683	0.300674
Bra026364	Bra031867	0.300666
Bra028291	Bra014848	0.300661
Bra004534	Bra000985	0.300631
Bra022772	Bra030673	0.300599
Bra024662	Bra008033	0.300579
Bra034592	Bra038174	0.300487
Bra017741	Bra026565	0.30048
Bra005891	Bra034321	0.300466
Bra035236	Bra024318	0.300458
Bra026364	Bra028533	0.30045
Bra035236	Bra000544	0.300449
Bra004534	Bra006833	0.300395
Bra003975	Bra022030	0.30039
Bra018051	Bra003588	0.30034
Bra003712	Bra034592	0.300275
Bra012655	Bra016306	0.300258
Bra038517	Bra001907	0.300213
Bra020179	Bra027849	0.300195
Bra002400	Bra033436	0.300192
Bra026364	Bra002528	0.300173
Bra004534	Bra017077	0.300164
Bra026364	Bra023560	0.300081
Bra010922	Bra013985	0.300009
Bra022981	Bra024020	0.299999
Bra022772	Bra007195	0.299966
Bra016561	Bra016860	0.299943
Bra025683	Bra014598	0.299901
Bra020433	Bra038174	0.299835
Bra015986	Bra017839	0.29977
Bra026364	Bra004540	0.299765
Bra026009	Bra016237	0.299757
Bra006401	Bra007669	0.299733
Bra035384	Bra031867	0.299717
Bra028523	Bra002400	0.299618
Bra000544	Bra017355	0.299615
Bra014598	Bra020179	0.299607
Bra002400	Bra027849	0.299596
Bra020433	Bra012149	0.299593
Bra038517	Bra018864	0.299581
Bra035148	Bra001067	0.299578
Bra011135	Bra028290	0.299541
Bra010396	Bra003780	0.299519
Bra033324	Bra026963	0.299453
Bra022437	Bra014774	0.299446
Bra016956	Bra019382	0.299436
Bra038517	Bra017743	0.299417
Bra020433	Bra038281	0.299372
Bra022437	Bra003546	0.299346
Bra017741	Bra026009	0.299287
Bra008101	Bra004633	0.299276
Bra028523	Bra031069	0.299271
Bra033436	Bra016191	0.299269
Bra039217	Bra006403	0.299258
Bra009184	Bra031069	0.299252
Bra020433	Bra007696	0.299251
Bra025917	Bra020179	0.299248
Bra019035	Bra039217	0.299247
Bra014666	Bra003975	0.29921
Bra019035	Bra010122	0.299206
Bra013985	Bra022030	0.299169
Bra002984	Bra034321	0.299032
Bra027920	Bra024662	0.299031
Bra022981	Bra036833	0.299028
Bra035002	Bra012088	0.298997
Bra035148	Bra020715	0.298986
Bra023742	Bra000423	0.298978
Bra002528	Bra024662	0.298977
Bra038521	Bra025325	0.298939
Bra032309	Bra020715	0.298899
Bra025683	Bra014774	0.298889
Bra034321	Bra023742	0.2988
Bra000544	Bra014774	0.298725
Bra016860	Bra007669	0.298636
Bra002528	Bra016191	0.298625
Bra006833	Bra015531	0.298615
Bra013815	Bra021503	0.298615
Bra007444	Bra017077	0.298602
Bra014774	Bra006941	0.298578
Bra033482	Bra000985	0.298546
Bra023742	Bra004540	0.298545
Bra039176	Bra038517	0.29853
Bra026364	Bra024318	0.298514
Bra017839	Bra020179	0.298506
Bra033077	Bra012088	0.298486
Bra028291	Bra006833	0.29847
Bra007205	Bra035384	0.298419
Bra035148	Bra030674	0.298389
Bra031656	Bra020179	0.298378
Bra019777	Bra017741	0.298359
Bra035384	Bra029242	0.298334
Bra007205	Bra025792	0.298331
Bra005891	Bra034155	0.298302
Bra024126	Bra019826	0.298269
Bra006709	Bra027849	0.298244
Bra002559	Bra027782	0.298234
Bra007205	Bra030674	0.298231
Bra031656	Bra024318	0.298218
Bra022772	Bra031195	0.298205
Bra019035	Bra031656	0.298156
Bra008101	Bra004165	0.298154
Bra010922	Bra019035	0.298144
Bra020433	Bra015986	0.298116
Bra006401	Bra021393	0.298083
Bra001752	Bra020368	0.298063
Bra024126	Bra000423	0.298059
Bra011686	Bra032309	0.298045
Bra020433	Bra014427	0.297993
Bra039099	Bra034592	0.297956
Bra038517	Bra038219	0.297914
Bra035148	Bra029242	0.297896
Bra015053	Bra000508	0.297885
Bra039217	Bra013985	0.297876
Bra024662	Bra017764	0.297868
Bra007444	Bra015531	0.297786
[truncated: 24,189 more rows]

## Sheet: black
fromNode	toNode	weight
Bra013579	Bra019406	0.42625
Bra019406	Bra029505	0.335133
Bra013579	Bra029505	0.316614
Bra023509	Bra008715	0.216016
Bra019255	Bra013748	0.210222
Bra010165	Bra023267	0.210094
Bra027487	Bra035977	0.189312
Bra019255	Bra021570	0.181415
Bra021570	Bra028330	0.174539
Bra028366	Bra023049	0.168783
Bra013748	Bra021570	0.165967
Bra019255	Bra028330	0.163762
Bra013748	Bra011831	0.157431
Bra019255	Bra011831	0.148983
Bra021179	Bra020863	0.144372
Bra013748	Bra028330	0.143485
Bra027082	Bra025326	0.142795
Bra010139	Bra019255	0.138971
Bra013579	Bra001891	0.13781
Bra038662	Bra037291	0.137214
Bra018067	Bra036788	0.13558
Bra004686	Bra004685	0.133535
Bra018634	Bra032037	0.132798
Bra017665	Bra031224	0.125041
Bra019406	Bra001891	0.124767
Bra011831	Bra014190	0.124765
Bra010139	Bra013748	0.123735
Bra004816	Bra006864	0.123693
Bra027487	Bra035520	0.123149
Bra030459	Bra018634	0.122229
Bra006864	Bra004686	0.122189
Bra030692	Bra035520	0.122175
Bra015417	Bra035520	0.119303
Bra019255	Bra035063	0.118097
Bra013748	Bra011600	0.116739
Bra006864	Bra030562	0.11663
Bra011831	Bra011600	0.11628
Bra004816	Bra004686	0.11594
Bra019255	Bra011600	0.115791
Bra002059	Bra018634	0.115563
Bra019255	Bra034977	0.115464
Bra020072	Bra018634	0.113991
Bra018634	Bra036915	0.113842
Bra035063	Bra028330	0.113464
Bra013579	Bra015346	0.112289
Bra030459	Bra032037	0.10998
Bra013748	Bra034977	0.109566
Bra038662	Bra009025	0.109455
Bra021570	Bra035063	0.108213
Bra011831	Bra021570	0.108074
Bra018067	Bra027815	0.107482
Bra034640	Bra031224	0.106627
Bra034977	Bra028330	0.106486
Bra006864	Bra004685	0.106322
Bra011831	Bra039116	0.106148
Bra004686	Bra037544	0.106037
Bra006864	Bra030692	0.105519
Bra018634	Bra014556	0.105014
Bra012358	Bra013451	0.104973
Bra017665	Bra034640	0.104618
Bra019255	Bra014190	0.103992
Bra018634	Bra016225	0.103733
Bra006919	Bra004686	0.103674
Bra031278	Bra035520	0.103605
Bra019406	Bra015346	0.102877
Bra030692	Bra004686	0.102744
Bra030459	Bra031278	0.102729
Bra003195	Bra025326	0.102567
Bra013748	Bra035063	0.101965
Bra030459	Bra002059	0.101734
Bra011831	Bra013451	0.101567
Bra037952	Bra030562	0.101324
Bra013579	Bra034466	0.100715
Bra034466	Bra015346	0.100057
Bra034977	Bra011831	0.100042

## Sheet: blue
fromNode	toNode	weight
Bra008482	Bra026123	0.446717
Bra008482	Bra016888	0.41928
Bra008482	Bra039152	0.419194
Bra026123	Bra039152	0.417377
Bra016888	Bra039152	0.408769
Bra026123	Bra016888	0.37869
Bra018989	Bra026123	0.315678
Bra018989	Bra008482	0.307841
Bra018989	Bra039152	0.290605
Bra018989	Bra016888	0.287422
Bra024699	Bra009584	0.286404
Bra008482	Bra004277	0.284884
Bra018477	Bra029761	0.27956
Bra039152	Bra004277	0.275483
Bra035909	Bra024699	0.273819
Bra037294	Bra007936	0.273091
Bra035909	Bra009584	0.260004
Bra016060	Bra007936	0.256269
Bra009835	Bra036542	0.25497
Bra009583	Bra024699	0.252071
Bra026123	Bra004277	0.250031
Bra007936	Bra012270	0.246665
Bra013224	Bra032356	0.243733
Bra009583	Bra009584	0.242328
Bra007936	Bra010503	0.241473
Bra014473	Bra037657	0.239883
Bra010736	Bra033572	0.238384
Bra038734	Bra001457	0.233465
Bra032396	Bra037934	0.232996
Bra016888	Bra004277	0.231973
Bra037294	Bra010503	0.228949
Bra010503	Bra012270	0.228126
Bra022511	Bra037934	0.225756
Bra016060	Bra010503	0.224191
Bra018989	Bra004277	0.223758
Bra027670	Bra037657	0.223485
Bra018698	Bra016669	0.223323
Bra037294	Bra012270	0.218021
Bra011172	Bra014473	0.213284
Bra011172	Bra037657	0.212814
Bra022511	Bra037657	0.211823
Bra001934	Bra032356	0.211818
Bra001934	Bra039679	0.211726
Bra037657	Bra037934	0.211651
Bra015227	Bra037657	0.209337
Bra025541	Bra037657	0.209103
Bra009583	Bra035909	0.208104
Bra025541	Bra037934	0.207863
Bra016060	Bra012270	0.207305
Bra002386	Bra002385	0.205067
Bra028924	Bra028952	0.205064
Bra027022	Bra019231	0.204677
Bra032396	Bra037657	0.203319
Bra015227	Bra037934	0.202187
Bra022511	Bra032396	0.201373
Bra002280	Bra007936	0.20102
Bra018806	Bra024278	0.200936
Bra014473	Bra037934	0.199375
Bra022115	Bra017495	0.198404
Bra027685	Bra007936	0.19645
Bra000613	Bra037934	0.196164
Bra012013	Bra037657	0.195306
Bra015227	Bra016238	0.195068
Bra010419	Bra014473	0.194424
Bra002280	Bra012270	0.193884
Bra001934	Bra013224	0.193182
Bra031610	Bra037657	0.191875
Bra028922	Bra039679	0.191629
Bra016238	Bra025480	0.191523
Bra025480	Bra037657	0.191309
Bra010419	Bra037657	0.190584
Bra038654	Bra037934	0.189985
Bra011172	Bra027670	0.189907
Bra032396	Bra010503	0.189641
Bra000474	Bra035909	0.189314
Bra027670	Bra037934	0.189091
Bra010503	Bra037934	0.188411
Bra020527	Bra020814	0.18751
Bra027685	Bra010503	0.186915
Bra031610	Bra037934	0.186603
Bra020169	Bra002386	0.186256
Bra022511	Bra014473	0.185726
Bra010419	Bra024100	0.185303
Bra014473	Bra027670	0.184815
Bra016238	Bra037657	0.18461
Bra013224	Bra039679	0.184486
Bra008880	Bra037657	0.18252
Bra002280	Bra010503	0.181911
Bra001934	Bra002386	0.181461
Bra010503	Bra020814	0.18137
Bra003883	Bra010503	0.181033
Bra011172	Bra037934	0.180756
Bra021637	Bra016381	0.17926
Bra003883	Bra016060	0.179169
Bra016238	Bra037934	0.178923
Bra001934	Bra028922	0.178344
Bra012013	Bra015227	0.17821
Bra015227	Bra025541	0.176911
Bra001457	Bra000474	0.176867
Bra027022	Bra028924	0.176592
Bra007936	Bra037934	0.176272
Bra027685	Bra012270	0.175637
Bra011172	Bra010419	0.174958
Bra002386	Bra028952	0.174945
Bra001934	Bra019295	0.174863
Bra010419	Bra037934	0.174821
Bra005221	Bra021637	0.17466
Bra010419	Bra027670	0.174212
Bra038654	Bra037657	0.174067
Bra038734	Bra000474	0.173534
Bra019231	Bra028952	0.173466
Bra032396	Bra025541	0.172708
Bra028924	Bra019231	0.172523
Bra002386	Bra039679	0.172441
Bra013224	Bra019295	0.172249
Bra022511	Bra031610	0.171623
Bra001934	Bra002385	0.171436
Bra011172	Bra022511	0.171119
Bra039679	Bra028952	0.17062
Bra013224	Bra028922	0.170272
Bra039137	Bra037934	0.169822
Bra008719	Bra020814	0.169678
Bra038734	Bra001934	0.168974
Bra022511	Bra027670	0.168827
Bra002386	Bra028922	0.168698
Bra032396	Bra016238	0.168238
Bra025541	Bra016238	0.16814
Bra028922	Bra019295	0.168043
Bra011172	Bra031610	0.16779
Bra028922	Bra032356	0.167746
Bra008719	Bra020527	0.167624
Bra002280	Bra037294	0.167573
Bra014340	Bra037657	0.167097
Bra003883	Bra020814	0.166782
Bra039137	Bra012857	0.166504
Bra010503	Bra037657	0.166391
Bra000613	Bra012857	0.166348
Bra015227	Bra032396	0.16582
Bra012013	Bra025480	0.165611
Bra000613	Bra020814	0.165501
Bra007936	Bra020814	0.165357
Bra001090	Bra016381	0.165323
Bra000384	Bra016381	0.165271
Bra031610	Bra014473	0.165204
Bra015048	Bra013224	0.165163
Bra018311	Bra005221	0.165142
Bra012013	Bra016238	0.164838
Bra012013	Bra037934	0.164591
Bra025480	Bra037934	0.164046
Bra029067	Bra037711	0.163958
Bra000613	Bra010503	0.163878
Bra022511	Bra010503	0.163782
Bra027586	Bra012624	0.163718
Bra039679	Bra028924	0.163624
Bra013224	Bra002386	0.163407
Bra027022	Bra039679	0.163115
Bra015227	Bra025480	0.163105
Bra039679	Bra032356	0.162677
Bra001934	Bra019231	0.161654
Bra000291	Bra012857	0.161514
Bra039679	Bra002385	0.161199
Bra020527	Bra012857	0.161174
Bra024735	Bra010503	0.160944
Bra022511	Bra025541	0.160594
Bra002386	Bra019295	0.160428
Bra039679	Bra019231	0.160417
Bra027685	Bra016060	0.160321
Bra004416	Bra037934	0.160161
Bra030799	Bra008880	0.159982
Bra012013	Bra025541	0.159928
Bra003883	Bra007936	0.159779
Bra016060	Bra037294	0.159552
Bra003883	Bra012268	0.159435
Bra020814	Bra037934	0.158718
Bra014312	Bra037258	0.158467
Bra002386	Bra028924	0.158191
Bra032396	Bra007936	0.158164
Bra008719	Bra012857	0.158127
Bra022511	Bra008333	0.158061
Bra005221	Bra016381	0.157982
Bra016381	Bra026090	0.157963
Bra004839	Bra010503	0.157962
Bra031610	Bra027670	0.157843
Bra001457	Bra035909	0.157677
Bra010980	Bra005864	0.157666
Bra036114	Bra017086	0.157538
Bra011172	Bra008880	0.157368
Bra023457	Bra010419	0.157018
Bra008719	Bra010503	0.156866
Bra036114	Bra003137	0.156632
Bra008333	Bra037934	0.156185
Bra022511	Bra007936	0.155997
Bra020169	Bra002385	0.155756
Bra004839	Bra037934	0.155507
Bra027022	Bra028952	0.155152
Bra003883	Bra037934	0.154937
Bra031610	Bra010503	0.154765
Bra000291	Bra038654	0.154739
Bra021637	Bra003126	0.154732
Bra039137	Bra037657	0.154372
Bra000384	Bra021637	0.154259
Bra008719	Bra037934	0.154067
Bra028922	Bra002385	0.154015
Bra010503	Bra016238	0.153851
Bra041076	Bra039152	0.153615
Bra031610	Bra010419	0.153428
Bra012857	Bra037934	0.152959
Bra039679	Bra019295	0.152954
Bra031610	Bra012857	0.152694
Bra037657	Bra018740	0.152678
Bra017012	Bra004967	0.15263
Bra022511	Bra010419	0.15228
Bra018311	Bra000384	0.152028
Bra001090	Bra021637	0.151609
Bra036114	Bra015133	0.151493
Bra000613	Bra031610	0.151202
Bra031610	Bra016238	0.150871
Bra000384	Bra014158	0.150424
Bra038654	Bra016238	0.150384
Bra034600	Bra016381	0.150187
Bra013224	Bra002385	0.150176
Bra007936	Bra037657	0.149979
Bra008333	Bra037657	0.149943
Bra027670	Bra008880	0.149706
Bra018311	Bra021637	0.149499
Bra014473	Bra008880	0.14946
Bra007085	Bra010528	0.149373
Bra023645	Bra014001	0.149196
Bra000474	Bra009584	0.149136
Bra005221	Bra000384	0.149031
Bra031610	Bra025541	0.148542
Bra004416	Bra024100	0.147791
Bra003883	Bra012270	0.147667
Bra003883	Bra004839	0.147591
Bra033666	Bra020814	0.147399
Bra016060	Bra020814	0.147386
Bra014340	Bra008880	0.147255
Bra000613	Bra000291	0.147167
Bra022511	Bra016238	0.146754
Bra031610	Bra008719	0.146644
Bra027670	Bra016238	0.146463
Bra014473	Bra025541	0.146459
Bra007912	Bra010503	0.146457
Bra022511	Bra015227	0.146303
Bra029104	Bra037934	0.146287
Bra000291	Bra037934	0.146207
Bra031610	Bra018740	0.146039
Bra000291	Bra039137	0.145894
Bra002386	Bra027022	0.145734
Bra020814	Bra012270	0.14569
Bra038654	Bra012857	0.145631
Bra025541	Bra010503	0.145122
Bra004839	Bra020814	0.144914
Bra002385	Bra028952	0.144523
Bra031610	Bra039137	0.144121
Bra010503	Bra020527	0.144058
Bra012013	Bra014473	0.143713
Bra008765	Bra019037	0.143534
Bra001934	Bra028952	0.143366
Bra031610	Bra008271	0.143322
Bra031610	Bra012013	0.14324
Bra020541	Bra015133	0.143186
Bra038734	Bra027022	0.142935
Bra010419	Bra012857	0.142678
Bra016381	Bra004898	0.142671
Bra025541	Bra025480	0.142573
Bra004416	Bra014473	0.142527
Bra041076	Bra016888	0.142399
Bra012268	Bra010503	0.142317
Bra018311	Bra016381	0.142232
Bra006985	Bra021637	0.142139
Bra025541	Bra027670	0.142074
Bra000613	Bra022511	0.142064
Bra016381	Bra014158	0.142026
Bra011655	Bra018797	0.14193
Bra024100	Bra014473	0.141629
Bra029500	Bra010503	0.14156
Bra012013	Bra027670	0.141538
Bra013224	Bra019231	0.141443
Bra020169	Bra001934	0.141421
Bra000507	Bra037934	0.141378
Bra010419	Bra018740	0.141142
Bra031610	Bra032396	0.141047
Bra036114	Bra001952	0.141035
Bra011172	Bra018740	0.141018
Bra018740	Bra037934	0.140972
Bra013224	Bra028952	0.140742
Bra001934	Bra028924	0.140564
Bra007912	Bra037934	0.140471
Bra008482	Bra041076	0.140438
Bra027685	Bra037294	0.140202
Bra024100	Bra037657	0.140027
Bra013046	Bra001934	0.139903
Bra012857	Bra037657	0.13972
Bra000384	Bra032268	0.139673
Bra032750	Bra032749	0.139601
Bra015048	Bra032356	0.139454
Bra015227	Bra010503	0.139429
Bra001457	Bra027022	0.139407
Bra011172	Bra024100	0.139316
Bra000507	Bra037657	0.139299
Bra030799	Bra014340	0.139256
Bra013224	Bra028924	0.13922
Bra003883	Bra016238	0.139154
Bra001934	Bra027022	0.139107
Bra009113	Bra004967	0.138902
Bra031610	Bra025480	0.138899
Bra000442	Bra010503	0.13886
Bra004416	Bra010419	0.138722
Bra028922	Bra028924	0.138697
Bra008784	Bra028665	0.138693
Bra031610	Bra015227	0.138477
Bra011172	Bra025541	0.138386
Bra004416	Bra037657	0.138277
Bra000613	Bra008719	0.13826
Bra020541	Bra036114	0.138118
Bra012269	Bra016886	0.137988
Bra000613	Bra037657	0.137984
Bra001457	Bra001934	0.137752
Bra020169	Bra039679	0.137723
Bra001090	Bra000384	0.137715
Bra038734	Bra013224	0.137654
Bra014473	Bra016238	0.137587
Bra014473	Bra008333	0.137427
Bra003126	Bra016381	0.13742
Bra033494	Bra036542	0.137289
Bra027586	Bra038779	0.137227
Bra034542	Bra012857	0.136671
Bra013675	Bra030251	0.136544
Bra004416	Bra027670	0.136503
Bra027586	Bra012857	0.136493
Bra020527	Bra037934	0.136114
Bra027586	Bra000291	0.13571
Bra031610	Bra007936	0.135334
Bra011172	Bra008333	0.135308
Bra007912	Bra037657	0.135192
Bra037294	Bra020814	0.135178
Bra031610	Bra008880	0.13515
Bra036140	Bra008271	0.135051
Bra007936	Bra016238	0.134388
Bra034355	Bra009584	0.134343
Bra036114	Bra014971	0.134311
Bra018656	Bra037033	0.134268
Bra010419	Bra008880	0.134129
Bra018137	Bra006234	0.133784
Bra005914	Bra009233	0.133735
Bra021637	Bra026090	0.133591
Bra004416	Bra008333	0.133519
Bra012857	Bra020814	0.133486
Bra021637	Bra016669	0.133454
Bra018656	Bra019037	0.133433
Bra002386	Bra019231	0.133401
Bra011172	Bra022724	0.133392
Bra000467	Bra033572	0.133196
Bra022511	Bra039137	0.133159
Bra019295	Bra002385	0.133083
Bra000442	Bra037934	0.133067
Bra011068	Bra015133	0.132596
Bra033120	Bra030417	0.132593
Bra022511	Bra012857	0.132568
Bra012013	Bra008880	0.132539
Bra000291	Bra020527	0.132207
Bra012013	Bra032396	0.132006
Bra040475	Bra015133	0.131964
Bra003883	Bra024735	0.131941
Bra030799	Bra014473	0.131924
Bra028922	Bra019231	0.131873
Bra008271	Bra010503	0.131832
Bra032396	Bra027670	0.131818
Bra021637	Bra014158	0.131684
Bra029500	Bra016060	0.13168
Bra000384	Bra004898	0.131663
Bra035909	Bra019231	0.131641
Bra036140	Bra010503	0.131587
Bra018311	Bra014158	0.131436
Bra033576	Bra022179	0.131399
Bra019037	Bra008340	0.131381
Bra011172	Bra014340	0.131269
Bra031610	Bra020814	0.131266
Bra022511	Bra004416	0.131186
Bra010503	Bra025480	0.131076
Bra022511	Bra000442	0.131053
Bra037258	Bra038749	0.130973
Bra030799	Bra027670	0.130898
Bra018311	Bra001090	0.130885
Bra020541	Bra037934	0.130862
Bra003883	Bra029500	0.130824
Bra038734	Bra039679	0.130767
Bra033666	Bra010503	0.130641
Bra030799	Bra012013	0.130515
Bra012268	Bra020814	0.130496
Bra000507	Bra016238	0.130464
Bra009113	Bra005853	0.130394
Bra011172	Bra032396	0.130389
Bra018986	Bra016381	0.130362
Bra030799	Bra037657	0.130299
Bra007912	Bra016238	0.130176
Bra029500	Bra007936	0.130099
Bra015227	Bra027670	0.129982
Bra000474	Bra024699	0.129906
Bra013046	Bra013224	0.129899
Bra003883	Bra037294	0.129879
Bra032750	Bra023636	0.129848
Bra032749	Bra029041	0.129777
Bra024100	Bra037934	0.129718
Bra014340	Bra012013	0.129715
Bra028922	Bra028952	0.129713
Bra031389	Bra006985	0.129676
Bra014473	Bra032396	0.129562
Bra019295	Bra028952	0.129461
Bra037847	Bra037934	0.129422
Bra006985	Bra016381	0.129329
Bra008880	Bra037934	0.129292
Bra027022	Bra024699	0.129193
Bra034783	Bra018477	0.129062
Bra011655	Bra022840	0.129045
Bra034542	Bra037934	0.129036
Bra010419	Bra039137	0.12874
Bra010419	Bra025541	0.128737
Bra013224	Bra027022	0.128651
Bra037258	Bra030417	0.128648
Bra011172	Bra016238	0.128643
Bra030188	Bra030417	0.128407
Bra022511	Bra037294	0.128335
Bra001952	Bra015133	0.128319
Bra038734	Bra035909	0.128286
Bra027685	Bra037657	0.128073
Bra037185	Bra030251	0.128056
Bra009930	Bra012857	0.127993
Bra008271	Bra024278	0.127887
Bra031610	Bra038654	0.127845
Bra018947	Bra030188	0.127767
Bra037294	Bra037934	0.127723
Bra003883	Bra020527	0.12772
Bra029753	Bra030417	0.127692
Bra023645	Bra014002	0.127645
Bra022511	Bra007912	0.127613
Bra024735	Bra020814	0.12752
Bra033666	Bra000291	0.127488
Bra018656	Bra008765	0.127385
Bra011172	Bra012857	0.127368
Bra000291	Bra008719	0.127349
Bra038654	Bra010503	0.127322
Bra012268	Bra037934	0.127231
Bra011172	Bra012013	0.127228
Bra010419	Bra008333	0.127175
Bra034542	Bra019037	0.127135
Bra003883	Bra027685	0.127105
Bra012857	Bra015133	0.126841
Bra033576	Bra005914	0.12676
Bra027022	Bra002385	0.126613
Bra014473	Bra012857	0.12655
Bra033666	Bra037934	0.126514
Bra027022	Bra035909	0.126423
Bra037258	Bra018116	0.126412
Bra018947	Bra025373	0.126368
Bra028924	Bra032356	0.12624
Bra012176	Bra005914	0.126072
Bra004416	Bra012857	0.126071
Bra014971	Bra015133	0.125967
Bra020541	Bra039137	0.125907
Bra002386	Bra032356	0.125711
Bra003883	Bra000613	0.12553
Bra028924	Bra002385	0.125516
Bra024735	Bra007936	0.12544
Bra040475	Bra011068	0.125398
Bra022511	Bra018740	0.125328
Bra022511	Bra038654	0.125283
Bra020541	Bra010419	0.125043
Bra039137	Bra015133	0.124661
Bra016238	Bra020814	0.12444
Bra000442	Bra037657	0.124378
Bra009583	Bra034355	0.124308
Bra019668	Bra022179	0.124164
Bra012268	Bra016238	0.124146
Bra031389	Bra016381	0.124116
Bra018116	Bra030417	0.124043
Bra014312	Bra038749	0.123946
Bra011172	Bra004416	0.123886
Bra009583	Bra030919	0.123871
Bra031389	Bra021637	0.12386
Bra033079	Bra025373	0.123785
Bra012857	Bra018740	0.123781
Bra018311	Bra032268	0.123749
Bra000291	Bra037657	0.123426
Bra028752	Bra023359	0.123286
Bra015227	Bra014473	0.12324
Bra011172	Bra015227	0.123236
Bra020541	Bra001952	0.123232
Bra027685	Bra037934	0.123161
Bra016060	Bra002280	0.123133
Bra014312	Bra030417	0.123111
Bra027685	Bra016238	0.123042
Bra031610	Bra014340	0.123023
Bra016381	Bra032268	0.122973
Bra027022	Bra032356	0.122971
Bra018806	Bra008271	0.122967
Bra025584	Bra027661	0.122958
Bra003883	Bra033666	0.122881
Bra012013	Bra038654	0.122799
Bra031610	Bra007912	0.122792
Bra034542	Bra020527	0.122699
Bra018947	Bra034005	0.122564
Bra022511	Bra012013	0.122545
Bra004416	Bra025541	0.122418
Bra011172	Bra030799	0.122408
Bra027022	Bra009584	0.122338
Bra037934	Bra012270	0.122297
Bra003883	Bra037657	0.122201
Bra023633	Bra001787	0.122188
Bra019295	Bra032356	0.122047
Bra014002	Bra014001	0.12186
Bra022115	Bra016886	0.121771
Bra000291	Bra012624	0.121603
Bra009113	Bra025159	0.121595
Bra014340	Bra027670	0.121592
Bra029104	Bra012857	0.121527
Bra030188	Bra037258	0.121348
Bra011172	Bra039137	0.121273
Bra000384	Bra026090	0.121247
Bra016238	Bra012857	0.121196
Bra025541	Bra012857	0.120998
Bra022511	Bra004839	0.120895
Bra008099	Bra038779	0.120815
Bra016063	Bra003883	0.120809
Bra020541	Bra012857	0.120592
Bra029104	Bra037657	0.120509
Bra023645	Bra023636	0.120497
Bra000474	Bra027022	0.120469
Bra009583	Bra022840	0.120405
Bra000613	Bra016238	0.120293
Bra039756	Bra012857	0.12011
Bra020541	Bra004416	0.120086
Bra010503	Bra012857	0.120048
Bra007085	Bra010980	0.119902
Bra003883	Bra039130	0.119868
Bra009583	Bra011655	0.119858
Bra037847	Bra012857	0.119782
Bra016060	Bra037934	0.119559
Bra028665	Bra027661	0.119515
Bra008271	Bra037657	0.119457
Bra010736	Bra000467	0.119402
Bra014340	Bra016238	0.119368
Bra012013	Bra010503	0.119287
Bra001661	Bra021241	0.119259
Bra028952	Bra032356	0.119194
Bra020541	Bra014473	0.119143
Bra010419	Bra015133	0.119054
Bra019295	Bra028924	0.118935
Bra027670	Bra012857	0.118908
Bra023457	Bra024100	0.118805
Bra027670	Bra018740	0.118761
Bra000351	Bra001531	0.118663
Bra014001	Bra023636	0.118577
Bra027586	Bra020527	0.11857
Bra014340	Bra014473	0.118569
Bra013046	Bra028922	0.118504
Bra022511	Bra025480	0.118494
Bra004416	Bra032396	0.118455
Bra018806	Bra024381	0.118437
Bra025541	Bra038654	0.118418
Bra037258	Bra033120	0.118302
Bra011068	Bra014971	0.118077
Bra031610	Bra000291	0.118047
Bra010419	Bra016238	0.118038
Bra032268	Bra014158	0.117991
Bra013675	Bra007085	0.117897
Bra000384	Bra018986	0.117859
Bra020541	Bra037657	0.117705
Bra007497	Bra016381	0.117702
Bra024699	Bra022840	0.117699
Bra011172	Bra020541	0.117645
Bra000291	Bra020814	0.117592
Bra030188	Bra033120	0.117368
Bra034355	Bra024699	0.117294
Bra032749	Bra023636	0.117215
Bra036114	Bra011068	0.11719
Bra018311	Bra035334	0.117128
Bra007912	Bra007936	0.117125
Bra013046	Bra039679	0.116902
Bra036140	Bra031610	0.116898
Bra009930	Bra037657	0.116844
Bra009583	Bra000474	0.116795
Bra021637	Bra018698	0.116783
Bra004416	Bra015133	0.116767
Bra017012	Bra017125	0.11668
Bra031610	Bra020527	0.116654
Bra009835	Bra033494	0.116472
Bra027685	Bra002280	0.116465
Bra039172	Bra016381	0.11646
Bra039980	Bra022724	0.116379
Bra008333	Bra025541	0.116289
Bra030799	Bra018137	0.11626
Bra015133	Bra017086	0.116258
Bra014473	Bra018740	0.116187
Bra024100	Bra027670	0.11618
Bra008831	Bra018137	0.116141
Bra020169	Bra019231	0.11614
Bra038734	Bra028922	0.116137
Bra004839	Bra007936	0.115936
Bra018947	Bra018116	0.115928
Bra003883	Bra032396	0.115882
Bra034600	Bra021637	0.115854
Bra010503	Bra039137	0.115823
Bra039172	Bra000384	0.115785
Bra033666	Bra012857	0.11561
Bra012013	Bra000507	0.115477
Bra001457	Bra013224	0.115348
Bra020541	Bra022511	0.115334
Bra006229	Bra005914	0.115312
Bra037657	Bra020814	0.115214
Bra018656	Bra007505	0.115116
Bra031389	Bra016669	0.11506
Bra031610	Bra022724	0.115005
Bra036140	Bra012767	0.114919
Bra038734	Bra032356	0.114906
Bra015227	Bra029104	0.114873
Bra008719	Bra037657	0.114782
Bra038749	Bra030417	0.114418
Bra003883	Bra008719	0.114317
Bra021637	Bra004898	0.114308
Bra018311	Bra003126	0.114273
Bra029500	Bra012270	0.114146
Bra019668	Bra005914	0.114042
Bra018311	Bra004898	0.113963
Bra037033	Bra037849	0.11396
Bra008880	Bra016238	0.11392
Bra020169	Bra028952	0.113919
Bra022511	Bra024100	0.113902
Bra022179	Bra005914	0.113876
Bra015227	Bra010419	0.113806
Bra022840	Bra009584	0.113763
Bra013046	Bra028952	0.113755
Bra038734	Bra019231	0.113724
Bra014473	Bra010503	0.113657
Bra033576	Bra019668	0.113648
Bra013046	Bra028924	0.113595
Bra022724	Bra037657	0.113495
Bra004839	Bra016238	0.113475
Bra008880	Bra019214	0.113449
Bra029104	Bra038654	0.113311
Bra010980	Bra019075	0.113273
Bra022511	Bra012270	0.113244
Bra038537	Bra030251	0.113224
Bra029067	Bra000291	0.113162
Bra037657	Bra012270	0.113086
Bra031610	Bra000507	0.113044
Bra019231	Bra002385	0.11301
Bra008271	Bra016238	0.112956
Bra008333	Bra027670	0.11294
Bra000442	Bra007936	0.112921
Bra039756	Bra010419	0.112893
Bra024377	Bra028924	0.112879
Bra016789	Bra015028	0.112808
Bra024100	Bra015133	0.112745
Bra012269	Bra022115	0.112698
Bra014001	Bra026090	0.112666
Bra003883	Bra031610	0.112656
Bra016238	Bra012270	0.112633
Bra009233	Bra015133	0.112598
Bra000507	Bra012857	0.112397
Bra001531	Bra022204	0.112376
Bra008271	Bra037934	0.112368
Bra015048	Bra001934	0.112308
Bra035909	Bra011655	0.112291
Bra004748	Bra000291	0.112274
Bra000291	Bra029104	0.112221
Bra009113	Bra017012	0.112023
Bra015133	Bra003137	0.112014
Bra022840	Bra018797	0.111991
Bra030799	Bra025480	0.111982
Bra027685	Bra020814	0.111962
Bra014312	Bra003102	0.111955
Bra037294	Bra037657	0.111953
Bra000613	Bra007936	0.111941
Bra022179	Bra017086	0.11189
Bra010542	Bra029414	0.111884
Bra008831	Bra030799	0.11172
Bra030799	Bra019214	0.111663
Bra031610	Bra004416	0.111497
Bra022511	Bra008880	0.111458
Bra011172	Bra010503	0.111446
Bra018311	Bra006985	0.111382
Bra004416	Bra015227	0.111348
Bra029104	Bra025541	0.111245
Bra004416	Bra018740	0.111175
Bra004416	Bra023457	0.11117
Bra009930	Bra015133	0.111125
Bra031610	Bra030799	0.111112
Bra031833	Bra015133	0.111079
Bra020169	Bra027022	0.11105
Bra000291	Bra037847	0.111012
Bra010419	Bra032396	0.111006
Bra008826	Bra006234	0.110996
Bra000384	Bra035334	0.110942
Bra006985	Bra003126	0.110826
Bra012013	Bra010419	0.1108
Bra005221	Bra003126	0.110778
Bra029104	Bra016238	0.110761
Bra032396	Bra020814	0.110678
Bra020541	Bra027670	0.110568
Bra001952	Bra011068	0.110386
Bra036114	Bra041076	0.110363
Bra035909	Bra022840	0.110302
Bra016381	Bra016669	0.110196
Bra020169	Bra028922	0.110161
Bra015227	Bra038654	0.110063
Bra024278	Bra024381	0.110042
Bra022179	Bra015133	0.110041
Bra004839	Bra037657	0.109956
Bra031610	Bra012270	0.109935
Bra031610	Bra004839	0.109906
Bra012013	Bra012857	0.109872
Bra008719	Bra007936	0.109844
Bra034542	Bra008719	0.10979
Bra021637	Bra032268	0.109776
Bra008719	Bra016238	0.109703
Bra025584	Bra028665	0.109534
Bra040146	Bra018137	0.109491
Bra039130	Bra020814	0.109481
Bra010528	Bra010980	0.109431
Bra018116	Bra038749	0.109381
Bra022511	Bra020814	0.109371
Bra031387	Bra037934	0.10936
Bra038958	Bra032356	0.109352
Bra011172	Bra025480	0.109343
Bra038734	Bra028924	0.109257
Bra003606	Bra000351	0.109118
Bra022511	Bra000291	0.109043
Bra015227	Bra012857	0.108996
Bra008340	Bra012857	0.108901
Bra001457	Bra009584	0.108898
Bra009583	Bra011819	0.108807
Bra000613	Bra034542	0.108786
Bra020541	Bra018740	0.108774
Bra000291	Bra010419	0.108768
Bra006985	Bra000384	0.108756
Bra022511	Bra008719	0.10875
Bra000291	Bra010503	0.108715
Bra005221	Bra014158	0.1087
Bra000925	Bra036330	0.108695
Bra007085	Bra030251	0.108685
Bra018137	Bra019214	0.108601
Bra021385	Bra030799	0.108572
Bra037033	Bra018785	0.108547
Bra019231	Bra032356	0.108408
Bra001457	Bra039679	0.108305
Bra023645	Bra032750	0.10826
Bra027670	Bra025480	0.108166
Bra041101	Bra027022	0.108157
Bra005221	Bra032268	0.108157
Bra030799	Bra015227	0.108124
Bra008880	Bra012857	0.108116
Bra010503	Bra012767	0.108077
Bra031610	Bra009930	0.108071
Bra024100	Bra012857	0.108056
Bra027586	Bra005853	0.107776
Bra001457	Bra032356	0.10774
Bra016060	Bra016238	0.107737
Bra014340	Bra010419	0.107579
Bra027446	Bra018797	0.107558
Bra012624	Bra012857	0.107547
Bra011068	Bra003137	0.107422
Bra030799	Bra025541	0.107345
Bra003883	Bra002280	0.107324
Bra018785	Bra037849	0.107287
Bra001457	Bra019231	0.107281
Bra022511	Bra027685	0.107181
Bra002385	Bra032356	0.10716
Bra019037	Bra012857	0.107145
Bra020541	Bra017086	0.107089
Bra036114	Bra012857	0.10708
Bra003883	Bra012857	0.107028
Bra020541	Bra024100	0.107018
Bra027670	Bra010503	0.107
Bra030919	Bra009584	0.106939
Bra029753	Bra037258	0.106938
Bra012176	Bra009233	0.106908
Bra014340	Bra037934	0.10684
Bra003883	Bra038654	0.106795
Bra029104	Bra010503	0.106775
Bra011655	Bra009584	0.106685
Bra030799	Bra010419	0.106566
Bra008271	Bra020814	0.106542
Bra001457	Bra028924	0.106502
Bra031610	Bra037294	0.106446
Bra034355	Bra035909	0.106372
Bra030799	Bra018797	0.10635
Bra009930	Bra037934	0.106324
Bra031649	Bra012857	0.106205
Bra000291	Bra009930	0.106173
Bra023645	Bra032749	0.106145
Bra030893	Bra018797	0.10611
Bra008271	Bra012857	0.106092
Bra000291	Bra037732	0.106073
Bra013466	Bra030417	0.106056
Bra002280	Bra020814	0.106035
Bra010419	Bra038654	0.105991
Bra019231	Bra009584	0.105987
Bra031649	Bra037934	0.105948
Bra003883	Bra022511	0.105947
Bra031610	Bra027685	0.105909
Bra023457	Bra014473	0.10586
Bra041101	Bra035909	0.105843
Bra021637	Bra018986	0.105749
Bra003883	Bra000291	0.105702
Bra024735	Bra012270	0.105702
Bra018947	Bra018785	0.105669
Bra033666	Bra029104	0.105665
Bra006429	Bra009536	0.105638
Bra032396	Bra037294	0.105602
Bra012268	Bra037657	0.105502
Bra033666	Bra008719	0.105446
Bra004416	Bra037847	0.105446
Bra033576	Bra009233	0.105428
Bra012624	Bra038779	0.105416
Bra018311	Bra030270	0.105348
Bra037294	Bra016238	0.105273
Bra037033	Bra007505	0.105224
Bra030799	Bra030893	0.105151
Bra026090	Bra004898	0.105147
Bra036114	Bra021202	0.10511
Bra025541	Bra008880	0.105086
Bra032750	Bra029041	0.105037
Bra035909	Bra028924	0.104852
Bra023457	Bra037657	0.104851
Bra003883	Bra029104	0.104844
Bra016238	Bra039137	0.104825
Bra010419	Bra009930	0.10478
Bra036114	Bra004416	0.104741
Bra024377	Bra028952	0.104697
Bra030799	Bra018740	0.104687
Bra006575	Bra027293	0.10468
Bra039756	Bra037657	0.104657
Bra020169	Bra013224	0.104582
Bra012268	Bra000291	0.104574
Bra000052	Bra027685	0.104525
Bra037257	Bra005914	0.104475
Bra001457	Bra028952	0.104236
Bra011172	Bra009930	0.104086
Bra031610	Bra000442	0.104021
Bra022511	Bra016060	0.103965
Bra028924	Bra024699	0.103687
Bra014473	Bra039137	0.103641
Bra008132	Bra005864	0.103581
Bra027586	Bra015133	0.103564
Bra000384	Bra003126	0.10356
Bra000507	Bra010503	0.103512
Bra029977	Bra000252	0.103496
Bra004416	Bra039137	0.103425
Bra038734	Bra028952	0.103208
Bra036114	Bra033667	0.103204
Bra018785	Bra022179	0.103168
Bra000291	Bra016238	0.103137
Bra034600	Bra000384	0.103092
Bra034542	Bra020814	0.103087
Bra005853	Bra000291	0.103012
Bra018656	Bra008340	0.103001
Bra034783	Bra019295	0.102911
Bra029500	Bra020814	0.102835
Bra037033	Bra019037	0.102813
Bra029104	Bra032396	0.102791
Bra020234	Bra036750	0.102788
Bra005914	Bra015133	0.102759
Bra003883	Bra015227	0.102749
Bra018137	Bra008880	0.102748
Bra031389	Bra018698	0.102646
Bra014473	Bra025480	0.102614
Bra039172	Bra014158	0.102573
Bra037258	Bra013466	0.102565
Bra018740	Bra015133	0.102559
Bra001952	Bra014971	0.102555
Bra024699	Bra028952	0.102499
Bra031610	Bra024100	0.102418
Bra037847	Bra015133	0.102391
Bra022179	Bra009233	0.102382
Bra039172	Bra021637	0.102376
Bra000613	Bra039137	0.102293
Bra031389	Bra000384	0.10227
Bra038537	Bra037185	0.102245
Bra034005	Bra011414	0.102201
Bra001241	Bra001662	0.102157
Bra008826	Bra018137	0.102146
Bra031833	Bra037934	0.102142
Bra031389	Bra005221	0.102135
Bra000291	Bra025541	0.102103
Bra005221	Bra035334	0.10201
Bra006229	Bra009233	0.102009
Bra016381	Bra033572	0.101973
Bra018806	Bra025995	0.101929
Bra004839	Bra008719	0.101866
Bra022179	Bra030417	0.101857
Bra023645	Bra018986	0.101788
Bra036114	Bra039137	0.101775
Bra036114	Bra031833	0.101729
Bra000507	Bra025541	0.101714
Bra027586	Bra033666	0.101655
Bra033667	Bra041076	0.101594
Bra031389	Bra003126	0.101506
Bra020541	Bra011068	0.101415
Bra041012	Bra030417	0.101344
Bra020541	Bra031610	0.10124
Bra018116	Bra034005	0.101174
Bra005864	Bra019075	0.101163
Bra037847	Bra037657	0.101114
Bra004839	Bra012857	0.101028
Bra029067	Bra012857	0.100994
Bra000291	Bra023009	0.100991
Bra032750	Bra009536	0.100944
Bra016238	Bra018740	0.100934
Bra000291	Bra015133	0.100878
Bra011172	Bra015133	0.100828
Bra029753	Bra033120	0.100777
Bra014312	Bra033120	0.100724
Bra020223	Bra011068	0.100683
Bra013046	Bra027022	0.10066
Bra020541	Bra003137	0.100656
Bra033079	Bra018947	0.100578
Bra011172	Bra038654	0.100462
Bra018785	Bra030417	0.100383
Bra034542	Bra015133	0.100377
Bra016060	Bra037657	0.100369
Bra025367	Bra013470	0.100289
Bra016381	Bra035334	0.100252
Bra025541	Bra007936	0.100243
Bra011655	Bra024699	0.100188
Bra036114	Bra022179	0.10017
Bra009583	Bra018797	0.10014
Bra039756	Bra015133	0.100126
Bra018311	Bra026090	0.1

## Sheet: green
fromNode	toNode	weight
Bra012004	Bra029928	0.235997
Bra026380	Bra029928	0.233266
Bra019070	Bra029928	0.232552
Bra000929	Bra029928	0.228208
Bra029928	Bra012616	0.226621
Bra026380	Bra003512	0.226234
Bra029928	Bra003882	0.225182
Bra029928	Bra036611	0.224753
Bra029928	Bra034070	0.224217
Bra029928	Bra001156	0.223353
Bra029928	Bra000853	0.223245
Bra029928	Bra035939	0.222961
Bra001306	Bra029928	0.222722
Bra029928	Bra005745	0.221567
Bra029928	Bra033171	0.221212
Bra029167	Bra003512	0.220955
Bra029928	Bra037566	0.22053
Bra029928	Bra040409	0.220293
Bra003512	Bra004806	0.218857
Bra029928	Bra028590	0.217824
Bra029928	Bra014472	0.215134
Bra029928	Bra006689	0.214933
Bra029928	Bra002741	0.214336
Bra029928	Bra040539	0.214251
Bra029928	Bra033999	0.214036
Bra029928	Bra030546	0.213936
Bra029928	Bra004806	0.213729
Bra035939	Bra003512	0.212919
Bra029984	Bra003512	0.2123
Bra029928	Bra003406	0.211928
Bra029928	Bra017170	0.211379
Bra029928	Bra028263	0.211225
Bra029928	Bra034799	0.210479
Bra029167	Bra029928	0.210028
Bra029928	Bra016647	0.209799
Bra029928	Bra003512	0.209447
Bra029928	Bra020000	0.209432
Bra028263	Bra003512	0.2076
Bra029928	Bra040415	0.206713
Bra029928	Bra012986	0.206442
Bra003406	Bra003512	0.206283
Bra033999	Bra003512	0.205225
Bra029928	Bra009557	0.204672
Bra017170	Bra034799	0.20429
Bra003512	Bra038817	0.20394
Bra029771	Bra029928	0.203627
Bra029928	Bra017545	0.202875
Bra028856	Bra034799	0.202821
Bra029928	Bra029984	0.202781
Bra029928	Bra003951	0.202463
Bra001306	Bra034799	0.202067
Bra029928	Bra015273	0.2017
Bra029928	Bra004901	0.201552
Bra029928	Bra012580	0.201292
Bra029928	Bra038817	0.201045
Bra033171	Bra034799	0.200639
Bra003951	Bra003512	0.200237
Bra029167	Bra026380	0.200199
Bra029928	Bra028867	0.200163
Bra003882	Bra034799	0.199386
Bra029928	Bra038628	0.198854
Bra034363	Bra003512	0.198669
Bra011350	Bra003512	0.198568
Bra019070	Bra003512	0.19848
Bra029928	Bra028028	0.19835
Bra029928	Bra026484	0.198308
Bra029928	Bra018017	0.198289
Bra026380	Bra004806	0.198228
Bra002741	Bra034799	0.198062
Bra026484	Bra003512	0.198005
Bra012004	Bra003512	0.197754
Bra029928	Bra039703	0.197678
Bra029928	Bra025548	0.197369
Bra038628	Bra003512	0.196894
Bra007188	Bra034799	0.196615
Bra026380	Bra009557	0.196529
Bra009557	Bra003512	0.196352
Bra017170	Bra028028	0.196248
Bra006689	Bra003512	0.196127
Bra012616	Bra003512	0.196098
Bra015299	Bra029928	0.194904
Bra034799	Bra028590	0.194089
Bra034799	Bra028028	0.193999
Bra034799	Bra040409	0.193906
Bra029928	Bra011350	0.193743
Bra028263	Bra003406	0.193605
Bra028263	Bra028028	0.193601
Bra002741	Bra017170	0.193546
Bra003512	Bra040415	0.193208
Bra029928	Bra028856	0.193163
Bra015299	Bra034799	0.192943
Bra029928	Bra032410	0.192889
Bra009557	Bra040415	0.191571
Bra003512	Bra030546	0.191458
Bra019632	Bra029928	0.190935
Bra017170	Bra007188	0.190682
Bra029771	Bra034799	0.190012
Bra012004	Bra034799	0.18999
Bra029167	Bra009557	0.189948
Bra028263	Bra004806	0.189787
Bra029928	Bra020079	0.189679
Bra003512	Bra017545	0.189599
Bra029928	Bra019574	0.189433
Bra003512	Bra039703	0.189154
Bra029931	Bra008030	0.189037
Bra009557	Bra011350	0.188743
Bra029928	Bra016555	0.188598
Bra029928	Bra008643	0.188534
Bra026380	Bra011350	0.188469
Bra003512	Bra028867	0.188318
Bra018017	Bra034799	0.188035
Bra019070	Bra009557	0.18784
Bra028263	Bra034799	0.187055
Bra028263	Bra017170	0.187029
Bra037566	Bra034799	0.186912
Bra029928	Bra031007	0.186413
Bra028028	Bra003512	0.186412
Bra009557	Bra035939	0.186315
Bra029928	Bra036117	0.186282
Bra034799	Bra023113	0.18608
Bra037566	Bra003512	0.185893
Bra034799	Bra010227	0.185832
Bra017170	Bra003406	0.185733
Bra026380	Bra028263	0.185661
Bra034363	Bra009557	0.185619
Bra036710	Bra029928	0.185406
Bra029928	Bra030573	0.185216
Bra034799	Bra006689	0.185194
Bra034363	Bra026380	0.185023
Bra033999	Bra034799	0.184968
Bra015299	Bra028856	0.184828
Bra029928	Bra010227	0.184695
Bra009557	Bra038628	0.184673
Bra034799	Bra030546	0.184434
Bra007572	Bra017170	0.184359
Bra017170	Bra033171	0.184337
Bra029928	Bra007188	0.184302
Bra003882	Bra040409	0.184273
Bra029928	Bra032506	0.184252
Bra000853	Bra003512	0.18407
Bra034363	Bra029928	0.183919
Bra003882	Bra003512	0.183901
Bra003991	Bra020722	0.183626
Bra003512	Bra009617	0.183573
Bra034799	Bra001156	0.183564
Bra017170	Bra030292	0.18337
Bra029928	Bra009617	0.18332
Bra019070	Bra034799	0.183151
Bra026380	Bra029984	0.183106
Bra029928	Bra024895	0.182827
Bra029928	Bra006595	0.182746
Bra004901	Bra034799	0.182683
Bra029167	Bra004806	0.18244
Bra001306	Bra028856	0.18243
Bra017170	Bra028856	0.182255
Bra034799	Bra003406	0.181837
Bra004901	Bra008643	0.181805
Bra037348	Bra003512	0.18158
Bra002741	Bra003512	0.181578
Bra029928	Bra040119	0.181543
Bra029931	Bra035980	0.181533
Bra015299	Bra017170	0.181523
Bra029931	Bra022978	0.181469
Bra026380	Bra003406	0.181377
Bra012004	Bra009557	0.181223
Bra004901	Bra016555	0.180964
Bra034799	Bra018226	0.180874
Bra029928	Bra000193	0.18085
Bra012004	Bra017170	0.180841
Bra018017	Bra040409	0.180817
Bra029928	Bra014334	0.180613
Bra026380	Bra035939	0.180593
Bra034070	Bra034799	0.180592
Bra036919	Bra021722	0.180526
Bra034799	Bra016647	0.180397
Bra009557	Bra003951	0.180267
Bra029928	Bra012447	0.180207
Bra019070	Bra026380	0.18017
Bra034799	Bra027986	0.180079
Bra026380	Bra038628	0.179959
Bra011664	Bra027986	0.179892
Bra028263	Bra033999	0.179771
Bra029167	Bra003406	0.179702
Bra029928	Bra011106	0.179522
Bra029771	Bra017170	0.179438
Bra019070	Bra036611	0.179421
Bra001306	Bra017170	0.179366
Bra029931	Bra021023	0.179287
Bra009557	Bra038817	0.179025
Bra012004	Bra037566	0.178898
Bra028856	Bra033285	0.178811
Bra034799	Bra020000	0.178756
Bra029928	Bra013239	0.178526
Bra011664	Bra034799	0.178235
Bra017170	Bra006689	0.178178
Bra014334	Bra003512	0.178071
Bra001156	Bra015273	0.17762
Bra033285	Bra034799	0.177551
Bra009557	Bra005745	0.177484
Bra029931	Bra023113	0.177375
Bra017170	Bra037566	0.177327
Bra029928	Bra011664	0.177271
Bra029771	Bra003512	0.177226
Bra034799	Bra012986	0.177122
Bra017170	Bra010227	0.177083
Bra026380	Bra033999	0.177006
Bra033171	Bra018017	0.176961
Bra029167	Bra028263	0.176961
Bra000929	Bra001156	0.176749
Bra009557	Bra026484	0.176657
Bra026380	Bra006689	0.176593
Bra028263	Bra006689	0.176484
Bra015299	Bra029931	0.176387
Bra034799	Bra004806	0.176379
Bra017170	Bra033999	0.176219
Bra011106	Bra003512	0.176192
Bra001156	Bra040409	0.176153
Bra036611	Bra003512	0.176109
Bra002741	Bra003406	0.175935
Bra029771	Bra004901	0.175911
Bra029167	Bra011350	0.175906
Bra019632	Bra017170	0.17563
Bra017170	Bra003882	0.175532
Bra029931	Bra001911	0.175496
Bra012004	Bra026380	0.175408
Bra026380	Bra034799	0.175335
Bra000929	Bra034799	0.175299
Bra009557	Bra006595	0.175038
Bra034363	Bra029167	0.175004
Bra029928	Bra039428	0.174988
Bra009557	Bra003406	0.174959
Bra026380	Bra012616	0.174883
Bra036710	Bra003512	0.174497
Bra026380	Bra028867	0.174003
Bra029928	Bra017461	0.173848
Bra029931	Bra037917	0.173488
Bra018017	Bra003882	0.17335
Bra009557	Bra028867	0.173051
Bra029928	Bra030787	0.172946
Bra029931	Bra035298	0.172864
Bra026380	Bra037348	0.172802
Bra000929	Bra003512	0.172736
Bra006689	Bra004806	0.172637
Bra040539	Bra003512	0.172634
Bra000929	Bra014472	0.172362
Bra019070	Bra005745	0.172312
Bra029931	Bra028856	0.172221
Bra004901	Bra018226	0.172191
Bra029600	Bra027011	0.172115
Bra026380	Bra036611	0.172112
Bra019632	Bra034799	0.172102
Bra016555	Bra034799	0.1721
Bra004901	Bra010329	0.172084
Bra012004	Bra003406	0.172029
Bra012004	Bra000929	0.171962
Bra009557	Bra037348	0.171814
Bra005745	Bra003512	0.171803
Bra034799	Bra039703	0.17172
Bra029931	Bra023052	0.171518
Bra004901	Bra019574	0.171266
Bra011106	Bra034799	0.171256
Bra012004	Bra002741	0.171244
Bra034799	Bra024895	0.17114
Bra003512	Bra012580	0.171053
Bra017170	Bra004901	0.170972
Bra009557	Bra036611	0.17079
Bra009557	Bra012447	0.170707
Bra028856	Bra023113	0.170635
Bra004901	Bra013915	0.170588
Bra029600	Bra002798	0.170505
Bra034799	Bra000853	0.17049
Bra033171	Bra003512	0.170446
Bra017170	Bra003512	0.170409
Bra009557	Bra004806	0.170363
Bra036919	Bra034799	0.17036
Bra011664	Bra040409	0.170348
Bra029931	Bra039428	0.170323
Bra026380	Bra036710	0.170185
Bra034799	Bra003512	0.170166
Bra029167	Bra037348	0.170156
Bra017170	Bra004806	0.170021
Bra029931	Bra011291	0.169923
Bra004901	Bra009431	0.169894
Bra036919	Bra029928	0.169856
Bra029928	Bra032012	0.169818
Bra014472	Bra001156	0.169722
Bra017170	Bra001156	0.16968
Bra028263	Bra002741	0.169661
Bra029928	Bra031166	0.169649
Bra000929	Bra016647	0.169646
Bra033171	Bra028856	0.169594
Bra001306	Bra015299	0.169575
Bra040539	Bra034799	0.169406
Bra006689	Bra028028	0.169398
Bra034070	Bra003512	0.16938
Bra034799	Bra013239	0.169317
Bra001306	Bra003882	0.169294
Bra019070	Bra017170	0.169058
Bra012004	Bra019070	0.16904
Bra017170	Bra023113	0.169038
Bra003512	Bra016647	0.168878
Bra029167	Bra038628	0.168826
Bra029931	Bra011664	0.168804
Bra029928	Bra037859	0.168804
Bra009557	Bra012616	0.168613
Bra029931	Bra024895	0.168539
Bra019574	Bra034799	0.168498
Bra002741	Bra004901	0.168459
Bra028263	Bra007188	0.168401
Bra029931	Bra018017	0.168347
Bra000853	Bra016647	0.168286
Bra017170	Bra024895	0.168123
Bra035298	Bra007214	0.168063
Bra026380	Bra017170	0.167958
Bra029928	Bra001298	0.167927
Bra036611	Bra001156	0.167812
Bra017170	Bra040409	0.167632
Bra003512	Bra032410	0.167568
Bra026380	Bra037566	0.16751
Bra013284	Bra011871	0.167403
Bra028263	Bra011106	0.167307
Bra028263	Bra037566	0.167306
Bra009557	Bra029984	0.167295
Bra029928	Bra018226	0.167211
Bra003512	Bra001298	0.167211
Bra018017	Bra012986	0.167154
Bra009557	Bra040539	0.167119
Bra030573	Bra034799	0.167116
Bra019070	Bra004901	0.167
Bra029928	Bra027222	0.166945
Bra036611	Bra005745	0.166893
Bra013284	Bra025058	0.166888
Bra009557	Bra001298	0.166869
Bra009557	Bra000853	0.166836
Bra001156	Bra000853	0.166768
Bra029771	Bra018226	0.166765
Bra034799	Bra036161	0.166692
Bra028590	Bra003512	0.166553
Bra029771	Bra019574	0.16652
Bra001306	Bra003512	0.16645
Bra026380	Bra003951	0.166368
Bra005258	Bra004901	0.166262
Bra028263	Bra009557	0.166181
Bra017461	Bra003512	0.166139
Bra029928	Bra027986	0.166056
Bra017170	Bra030546	0.165967
Bra019574	Bra003512	0.165903
Bra020000	Bra016647	0.16586
Bra012004	Bra033171	0.165836
Bra001156	Bra024895	0.165819
Bra028856	Bra003882	0.165783
Bra017170	Bra018017	0.165725
Bra028856	Bra001911	0.165706
Bra009557	Bra006689	0.165702
Bra009557	Bra032410	0.165545
Bra006595	Bra003512	0.165461
Bra036919	Bra029752	0.165425
Bra005180	Bra002798	0.165405
Bra012004	Bra001156	0.16535
Bra002290	Bra029928	0.165319
Bra022484	Bra003512	0.165317
Bra018017	Bra001156	0.165312
Bra029931	Bra039787	0.165289
Bra017170	Bra013284	0.165263
Bra005180	Bra034356	0.165201
Bra012004	Bra006689	0.165189
Bra009557	Bra037566	0.165162
Bra003991	Bra027011	0.165158
Bra033171	Bra029931	0.165127
Bra002741	Bra028028	0.165066
Bra017170	Bra016555	0.164966
Bra010455	Bra007214	0.164902
Bra029931	Bra007214	0.164857
Bra012004	Bra028263	0.164806
Bra029928	Bra033285	0.164788
Bra019632	Bra018017	0.164717
Bra008643	Bra034799	0.164708
Bra034799	Bra005745	0.164684
Bra007572	Bra034799	0.164657
Bra011664	Bra028856	0.164618
Bra007214	Bra035980	0.164593
Bra037566	Bra006689	0.164553
Bra001156	Bra003512	0.16454
Bra015299	Bra018017	0.164536
Bra036919	Bra033285	0.164527
Bra036117	Bra016647	0.164516
Bra029931	Bra030573	0.164469
Bra017170	Bra011106	0.164398
Bra034799	Bra012667	0.164386
Bra028263	Bra039703	0.164349
Bra036710	Bra004901	0.164347
Bra003991	Bra034590	0.164269
Bra015299	Bra014945	0.164247
Bra026380	Bra028028	0.164209
Bra029931	Bra040145	0.164178
Bra026380	Bra017545	0.164078
Bra007214	Bra000501	0.164062
Bra001156	Bra005745	0.164012
Bra029931	Bra036669	0.164007
Bra003512	Bra020079	0.163859
Bra036919	Bra029112	0.1638
Bra001306	Bra018017	0.163686
Bra029931	Bra015131	0.163578
Bra029928	Bra009404	0.16353
Bra007188	Bra028856	0.163512
Bra001156	Bra012986	0.163468
Bra001306	Bra011664	0.163353
Bra004901	Bra032017	0.163328
Bra029928	Bra023113	0.163265
Bra019070	Bra001156	0.163245
Bra016555	Bra001156	0.16319
Bra012616	Bra034799	0.163159
Bra036611	Bra034799	0.163127
Bra003882	Bra001156	0.162985
Bra017170	Bra028590	0.162878
Bra009557	Bra017545	0.162837
Bra036117	Bra034799	0.162785
Bra030573	Bra001156	0.162782
Bra029928	Bra037348	0.162768
Bra012616	Bra003882	0.162712
Bra035939	Bra026484	0.162674
Bra026380	Bra003882	0.162664
Bra017170	Bra038503	0.162564
Bra018017	Bra014472	0.162554
Bra005180	Bra000009	0.162463
Bra033999	Bra006689	0.162452
Bra034799	Bra014472	0.162419
Bra033171	Bra003882	0.162399
Bra000929	Bra018017	0.162387
Bra004901	Bra005745	0.162346
Bra029167	Bra029984	0.162309
Bra017461	Bra034799	0.162271
Bra012004	Bra020079	0.162235
Bra015299	Bra033171	0.162194
Bra034799	Bra013284	0.162081
Bra001306	Bra029931	0.162066
Bra029771	Bra028263	0.162034
Bra029931	Bra034799	0.162021
Bra017170	Bra014945	0.161998
Bra040409	Bra016647	0.161926
Bra028856	Bra010227	0.161893
Bra007188	Bra003512	0.16188
Bra029931	Bra000159	0.161839
Bra029167	Bra033999	0.161827
Bra031673	Bra036111	0.161807
Bra010787	Bra034799	0.161801
Bra029931	Bra003427	0.161623
Bra029931	Bra028669	0.16162
Bra016647	Bra030546	0.161599
Bra030573	Bra018017	0.161588
Bra003512	Bra025548	0.161406
Bra003991	Bra029600	0.161382
Bra017170	Bra039703	0.161304
Bra026380	Bra029771	0.161238
Bra002741	Bra007188	0.161187
Bra026380	Bra038817	0.16117
Bra029771	Bra028028	0.161133
Bra028856	Bra028028	0.161092
Bra003882	Bra016647	0.160968
Bra003882	Bra012986	0.160966
Bra009557	Bra002741	0.160953
Bra039428	Bra034799	0.160864
Bra003882	Bra027986	0.160836
Bra036919	Bra036285	0.160781
Bra012004	Bra033999	0.16076
Bra038503	Bra034799	0.160737
Bra012447	Bra003512	0.160708
Bra012004	Bra030546	0.160699
Bra033171	Bra001156	0.160666
Bra028856	Bra018017	0.160655
Bra018017	Bra010227	0.160642
Bra014743	Bra003512	0.160491
Bra010227	Bra003512	0.160479
Bra035939	Bra034799	0.160322
Bra018017	Bra024895	0.16031
Bra026380	Bra019574	0.16028
Bra029931	Bra027986	0.160215
Bra034799	Bra017545	0.160153
Bra036710	Bra029771	0.160119
Bra012004	Bra040415	0.160106
Bra017170	Bra018226	0.160041
Bra029931	Bra040409	0.16001
Bra034799	Bra001911	0.15998
Bra026380	Bra005745	0.159746
Bra029167	Bra006689	0.159742
Bra015299	Bra040409	0.159715
Bra033999	Bra003882	0.159657
Bra010787	Bra029931	0.159585
Bra026380	Bra026484	0.159563
Bra029931	Bra012667	0.159533
Bra017170	Bra013239	0.159518
Bra001156	Bra028590	0.159484
Bra012004	Bra000853	0.159314
Bra028856	Bra027986	0.15926
Bra029931	Bra040747	0.159241
Bra004901	Bra001156	0.159226
Bra011664	Bra003882	0.15915
Bra012004	Bra012616	0.159133
Bra028263	Bra010227	0.159128
Bra018017	Bra028590	0.159055
Bra028263	Bra012012	0.159054
Bra012004	Bra004901	0.159042
Bra005180	Bra027011	0.158973
Bra039428	Bra001156	0.158962
Bra000929	Bra003882	0.158944
Bra011664	Bra018017	0.158898
Bra018017	Bra039428	0.158873
Bra001306	Bra001156	0.158864
Bra020000	Bra003512	0.158862
Bra026380	Bra030546	0.158718
Bra029167	Bra034799	0.158704
Bra034070	Bra001156	0.158696
Bra012004	Bra016647	0.158695
Bra017170	Bra033285	0.15867
Bra031673	Bra040161	0.15867
Bra013284	Bra030292	0.158649
Bra013239	Bra003512	0.158559
Bra017170	Bra019574	0.158557
Bra026380	Bra002741	0.158546
Bra004901	Bra006689	0.158537
Bra015299	Bra003882	0.158512
Bra028856	Bra040409	0.158501
Bra019070	Bra002741	0.158415
Bra034799	Bra027222	0.158367
Bra029167	Bra036710	0.158267
Bra034799	Bra040119	0.158243
Bra001306	Bra016647	0.158194
Bra029167	Bra035939	0.15819
Bra004901	Bra003512	0.158153
Bra009557	Bra033999	0.15806
Bra036710	Bra028263	0.158046
Bra036611	Bra003882	0.157991
Bra019070	Bra003951	0.157903
Bra036919	Bra035826	0.157862
Bra003882	Bra000853	0.157809
Bra034799	Bra029752	0.157716
Bra040119	Bra016647	0.157648
Bra004901	Bra028867	0.157638
Bra000929	Bra009557	0.157593
Bra029167	Bra014743	0.157431
Bra036710	Bra017170	0.157425
Bra019070	Bra003406	0.157395
Bra019070	Bra000929	0.15738
Bra003882	Bra010227	0.157363
Bra028856	Bra006443	0.157351
Bra036710	Bra009557	0.157314
Bra019070	Bra035939	0.157239
Bra028856	Bra020000	0.157238
Bra026380	Bra039703	0.157186
Bra002741	Bra037566	0.157176
Bra034799	Bra007214	0.157166
Bra040895	Bra003270	0.157136
Bra029928	Bra036161	0.157111
Bra028856	Bra029752	0.1571
Bra012004	Bra001306	0.15709
Bra015299	Bra033285	0.157085
Bra036919	Bra016913	0.157042
Bra029167	Bra019070	0.156945
Bra040161	Bra003270	0.156927
Bra007188	Bra028028	0.156775
Bra029600	Bra018381	0.156764
Bra002741	Bra006689	0.156748
Bra040409	Bra003512	0.156747
Bra012004	Bra029167	0.156703
Bra029928	Bra040115	0.156675
Bra002741	Bra028856	0.156622
Bra036710	Bra034799	0.156589
Bra003882	Bra030546	0.15658
Bra002741	Bra011106	0.156559
Bra029931	Bra014945	0.156551
Bra026380	Bra040415	0.156548
Bra017170	Bra027222	0.156507
Bra016913	Bra003512	0.156495
Bra012004	Bra004806	0.156417
Bra034070	Bra003882	0.156417
Bra004901	Bra017749	0.156374
Bra029167	Bra028867	0.156372
Bra036919	Bra028856	0.15636
Bra036117	Bra040119	0.156204
Bra036919	Bra036117	0.156189
Bra034799	Bra006443	0.156124
Bra029928	Bra022484	0.156098
Bra004901	Bra022351	0.156069
Bra007214	Bra001052	0.15605
Bra013284	Bra028778	0.155963
Bra026380	Bra014743	0.155936
Bra012004	Bra039703	0.155877
Bra012004	Bra032410	0.155855
Bra033171	Bra037566	0.155805
Bra034799	Bra000501	0.155796
Bra004901	Bra028590	0.155739
Bra009557	Bra002411	0.155669
Bra009557	Bra030546	0.155659
Bra029931	Bra000501	0.155654
Bra030573	Bra024895	0.155654
Bra029931	Bra018689	0.15565
Bra001156	Bra016647	0.155502
Bra019632	Bra003882	0.155462
Bra015299	Bra011664	0.155443
Bra007214	Bra022978	0.155409
Bra000929	Bra017170	0.15537
Bra012004	Bra014472	0.155298
Bra029771	Bra002741	0.155251
Bra034363	Bra037348	0.155213
Bra028263	Bra013239	0.155193
Bra018017	Bra000853	0.155188
Bra019070	Bra040415	0.15515
Bra018017	Bra030546	0.155068
Bra029928	Bra012667	0.155038
Bra028856	Bra000501	0.15503
Bra012004	Bra005745	0.154996
Bra034799	Bra030292	0.154995
Bra014472	Bra016647	0.154942
Bra029931	Bra033285	0.154879
Bra007572	Bra013284	0.154866
Bra004901	Bra024895	0.154827
Bra015299	Bra001911	0.154803
Bra029771	Bra009557	0.154777
Bra019632	Bra006689	0.154723
Bra015299	Bra010227	0.154705
Bra019070	Bra000853	0.154668
Bra029771	Bra006689	0.154666
Bra019632	Bra015299	0.154659
Bra000929	Bra012616	0.154622
Bra009557	Bra034364	0.15457
Bra029167	Bra017170	0.154557
Bra019070	Bra006689	0.154477
Bra009431	Bra013915	0.154377
Bra003882	Bra014472	0.154363
Bra009557	Bra025548	0.154349
Bra009557	Bra001156	0.154296
Bra026380	Bra000853	0.154239
Bra009557	Bra022484	0.15422
Bra007572	Bra029928	0.154206
Bra012986	Bra003512	0.154193
Bra033171	Bra004901	0.154171
Bra029984	Bra004806	0.154155
Bra033171	Bra040409	0.154114
Bra007214	Bra039787	0.154069
Bra032506	Bra016647	0.154043
Bra034590	Bra020722	0.153951
Bra004901	Bra037566	0.153891
Bra018017	Bra034070	0.153802
Bra007214	Bra036669	0.153683
Bra012916	Bra021294	0.153671
Bra028856	Bra014945	0.153592
Bra019070	Bra012616	0.15359
Bra026380	Bra033171	0.153558
Bra036710	Bra006689	0.153525
Bra019574	Bra006689	0.153458
Bra012616	Bra026484	0.153424
Bra015299	Bra023113	0.153396
Bra000853	Bra026484	0.153346
Bra034799	Bra012580	0.153335
Bra018017	Bra023113	0.153309
Bra036919	Bra003512	0.153281
Bra019070	Bra028867	0.153235
Bra012004	Bra003882	0.153234
Bra007214	Bra012667	0.15323
Bra033171	Bra006689	0.153225
Bra028263	Bra030546	0.153198
Bra003406	Bra006689	0.153178
Bra026380	Bra022484	0.153127
Bra029167	Bra038817	0.153119
Bra009557	Bra034070	0.153116
Bra000929	Bra000853	0.153083
Bra018017	Bra033999	0.153073
Bra034799	Bra028867	0.153063
Bra030787	Bra040119	0.15305
Bra012616	Bra016647	0.153036
Bra003882	Bra028590	0.153023
Bra019070	Bra029771	0.153017
Bra028856	Bra007214	0.152986
Bra019632	Bra001156	0.152984
Bra009557	Bra004901	0.152977
Bra010455	Bra031673	0.152952
Bra004901	Bra021990	0.152931
Bra029931	Bra025895	0.152905
Bra034070	Bra016647	0.152885
Bra019070	Bra040539	0.152817
Bra018017	Bra037566	0.152806
Bra019070	Bra003882	0.152799
Bra033171	Bra016647	0.152797
Bra011664	Bra040119	0.152795
Bra012004	Bra028028	0.152782
Bra018017	Bra027986	0.152777
Bra000929	Bra032506	0.15277
Bra017170	Bra034070	0.152724
Bra003882	Bra004806	0.152715
Bra013284	Bra010694	0.152704
Bra029984	Bra026484	0.152659
Bra033285	Bra007214	0.15264
Bra017170	Bra012986	0.152601
Bra029928	Bra010329	0.152591
Bra033999	Bra004806	0.15258
Bra003512	Bra034364	0.15255
Bra028856	Bra035298	0.152535
Bra018017	Bra015273	0.152411
Bra029931	Bra010455	0.152368
Bra017170	Bra001911	0.152255
Bra029931	Bra014472	0.152195
Bra029931	Bra013887	0.152158
Bra036919	Bra011551	0.152127
Bra019070	Bra001306	0.152123
Bra036919	Bra006443	0.152064
Bra009557	Bra014743	0.151988
Bra025548	Bra016647	0.151956
Bra031673	Bra031682	0.151933
Bra003808	Bra029600	0.151876
Bra017170	Bra016647	0.15187
Bra009557	Bra020079	0.15187
Bra028856	Bra034070	0.15185
Bra029167	Bra028028	0.151822
Bra012616	Bra035939	0.1518
Bra019070	Bra034070	0.151741
Bra017170	Bra036161	0.151634
Bra040539	Bra001156	0.151619
Bra028263	Bra033171	0.151612
Bra036710	Bra000009	0.1516
Bra012004	Bra035939	0.151564
Bra003808	Bra027011	0.151559
Bra019070	Bra038628	0.151545
Bra029771	Bra028867	0.151542
Bra034799	Bra032410	0.15151
Bra029928	Bra029931	0.151384
Bra034799	Bra015273	0.151357
Bra019070	Bra012986	0.151348
Bra030573	Bra039428	0.151324
Bra019070	Bra028590	0.151311
Bra009557	Bra020885	0.151277
Bra029984	Bra034799	0.151263
Bra001306	Bra034070	0.151192
Bra002741	Bra033999	0.151092
Bra000929	Bra034070	0.151021
Bra012004	Bra038817	0.151014
Bra034799	Bra013915	0.150986
Bra029984	Bra003882	0.150955
Bra001156	Bra030546	0.150898
Bra034799	Bra038817	0.150822
Bra028263	Bra036161	0.150789
Bra009557	Bra016647	0.150721
Bra001127	Bra013284	0.15072
Bra015299	Bra027222	0.150709
Bra003951	Bra034799	0.150705
Bra029167	Bra040415	0.150695
Bra036919	Bra039703	0.150654
Bra029771	Bra000009	0.150634
Bra017170	Bra039428	0.150625
Bra015299	Bra014472	0.150589
Bra028856	Bra037566	0.150582
Bra036919	Bra010227	0.150546
Bra003882	Bra020000	0.15053
Bra029167	Bra022484	0.150526
Bra029167	Bra039703	0.15052
Bra019070	Bra028263	0.150446
Bra002798	Bra035629	0.150443
Bra019070	Bra004806	0.150426
Bra036919	Bra037080	0.150421
Bra002741	Bra033171	0.150398
Bra012004	Bra018017	0.150396
Bra009557	Bra039703	0.150392
Bra009557	Bra014334	0.150379
Bra021990	Bra013284	0.150375
Bra035980	Bra036669	0.150375
Bra029167	Bra037566	0.150321
Bra028590	Bra016647	0.150315
Bra011664	Bra008030	0.150256
Bra000929	Bra012580	0.15023
Bra017170	Bra030573	0.150229
Bra036919	Bra030546	0.150161
Bra000929	Bra030787	0.150158
Bra037566	Bra001156	0.150143
Bra028856	Bra012667	0.150121
Bra029928	Bra032017	0.15008
Bra018017	Bra016647	0.150067
Bra009557	Bra028590	0.149979
Bra002741	Bra001156	0.149972
Bra018017	Bra012667	0.149966
Bra000193	Bra016647	0.149886
Bra004901	Bra036611	0.149834
Bra019070	Bra040409	0.149823
Bra018017	Bra008030	0.149774
Bra004901	Bra017461	0.149765
Bra003951	Bra026484	0.149764
Bra014472	Bra003512	0.149764
Bra026380	Bra020885	0.149759
Bra018017	Bra022978	0.149693
Bra034363	Bra011350	0.149624
Bra028263	Bra029984	0.149616
Bra029931	Bra003047	0.149576
Bra029167	Bra017545	0.149573
Bra007572	Bra004901	0.149548
Bra029928	Bra016913	0.149546
Bra034799	Bra009617	0.149534
Bra028856	Bra030546	0.149526
Bra017170	Bra000501	0.149513
Bra001306	Bra033171	0.149505
Bra012004	Bra034070	0.14945
Bra004901	Bra028778	0.149449
Bra012004	Bra028856	0.149354
Bra007214	Bra029752	0.14928
Bra029931	Bra010620	0.149231
Bra028263	Bra038817	0.149207
Bra035298	Bra010455	0.149182
Bra029931	Bra027222	0.149121
Bra007214	Bra037917	0.149058
Bra028028	Bra004806	0.149043
Bra028856	Bra033999	0.149023
Bra031673	Bra022878	0.149022
Bra029928	Bra020885	0.149013
Bra004901	Bra028028	0.149
Bra032506	Bra003512	0.148999
Bra018017	Bra040119	0.148954
Bra026380	Bra001156	0.148944
Bra029167	Bra003951	0.14894
Bra026380	Bra004901	0.148923
Bra022978	Bra013887	0.148917
Bra028856	Bra028590	0.148882
Bra017170	Bra008643	0.148842
Bra017170	Bra011664	0.14878
Bra034799	Bra008030	0.148756
Bra028263	Bra017545	0.148753
Bra007214	Bra001911	0.148735
Bra030573	Bra014472	0.148664
Bra033171	Bra011664	0.148653
Bra035939	Bra003882	0.148641
Bra028263	Bra028856	0.148604
Bra012004	Bra036611	0.148593
Bra012004	Bra013239	0.148581
Bra026380	Bra001306	0.148568
Bra005258	Bra009431	0.148531
Bra028856	Bra016647	0.148519
Bra029931	Bra038503	0.148491
Bra037566	Bra016647	0.148478
Bra019070	Bra037566	0.148477
Bra000929	Bra040119	0.148423
Bra006689	Bra028867	0.148417
Bra028856	Bra008030	0.148376
Bra026380	Bra000929	0.148366
Bra026380	Bra034070	0.148319
Bra036117	Bra018017	0.148288
Bra028263	Bra038628	0.14825
Bra023728	Bra040119	0.148222
Bra009557	Bra011106	0.148208
Bra009557	Bra038112	0.148206
Bra026484	Bra025548	0.148184
Bra007214	Bra023052	0.148184
Bra004901	Bra012986	0.148177
Bra020885	Bra003512	0.148172
Bra007188	Bra006689	0.148156
Bra029928	Bra010787	0.148053
Bra005180	Bra003991	0.148035
Bra007214	Bra037920	0.147954
Bra007188	Bra018017	0.147919
Bra028778	Bra025058	0.147902
Bra004901	Bra000009	0.147805
Bra009557	Bra003882	0.147793
Bra017170	Bra005745	0.147783
Bra029771	Bra003406	0.147769
Bra003991	Bra002798	0.147747
Bra009557	Bra034799	0.147727
Bra009557	Bra012003	0.147723
Bra007214	Bra021023	0.147712
Bra034799	Bra032506	0.147639
Bra019070	Bra036710	0.14763
Bra018017	Bra003512	0.147571
Bra009431	Bra022760	0.14757
Bra033999	Bra030546	0.147473
Bra012004	Bra040539	0.14746
Bra034799	Bra038628	0.147417
Bra029167	Bra002741	0.147368
Bra036919	Bra033999	0.147348
Bra001306	Bra040409	0.147311
Bra035298	Bra034799	0.147309
Bra017170	Bra020000	0.147298
Bra031673	Bra006629	0.147281
Bra019070	Bra030546	0.147268
Bra003882	Bra012580	0.147265
Bra007188	Bra010227	0.147264
Bra028263	Bra019574	0.147248
Bra017170	Bra006443	0.14724
Bra012004	Bra012580	0.147221
Bra015299	Bra008030	0.14722
Bra028263	Bra028867	0.147217
Bra028263	Bra003882	0.147196
Bra012004	Bra029771	0.14719
Bra015299	Bra030292	0.147177
Bra029771	Bra004806	0.147176
Bra017170	Bra029931	0.147105
Bra029931	Bra003882	0.147105
Bra000929	Bra030573	0.1471
Bra001156	Bra003427	0.147097
Bra005180	Bra029600	0.147076
Bra029167	Bra011106	0.147057
Bra028856	Bra003512	0.147056
Bra028263	Bra004901	0.147054
Bra012004	Bra040409	0.147045
Bra018017	Bra040115	0.147034
Bra028856	Bra035980	0.146989
Bra006689	Bra013239	0.146988
Bra034799	Bra040747	0.146973
Bra036919	Bra036161	0.146965
Bra004901	Bra015273	0.146915
Bra028856	Bra036117	0.14691
Bra018017	Bra006689	0.146861
Bra000929	Bra025548	0.146857
Bra038503	Bra013284	0.146854
Bra012580	Bra016647	0.14681
Bra015299	Bra024895	0.146786
Bra034799	Bra040415	0.146776
Bra007572	Bra029931	0.146748
Bra019632	Bra033171	0.146738
Bra029984	Bra035939	0.146721
Bra009557	Bra017461	0.146717
Bra029167	Bra020885	0.146691
Bra000929	Bra001306	0.146677
Bra000929	Bra040409	0.146578
Bra015299	Bra020000	0.146542
Bra030787	Bra016647	0.14649
Bra029928	Bra002411	0.146475
Bra011106	Bra006689	0.146468
Bra015299	Bra016647	0.146451
Bra011664	Bra034070	0.146443
Bra036710	Bra014763	0.146415
Bra035939	Bra016647	0.146411
Bra029928	Bra037080	0.146375
Bra018017	Bra020000	0.146353
Bra009557	Bra032012	0.146345
Bra036710	Bra019574	0.146332
Bra003512	Bra036161	0.146327
Bra019070	Bra016647	0.146273
Bra040539	Bra016647	0.146144
Bra029167	Bra012616	0.146138
Bra004901	Bra001127	0.146122
Bra019070	Bra016555	0.146095
Bra034799	Bra003047	0.146086
Bra012616	Bra001156	0.14607
Bra019070	Bra011350	0.146063
Bra007572	Bra015299	0.146048
Bra012370	Bra003512	0.146041
Bra004901	Bra003406	0.146041
Bra009557	Bra008643	0.146037
Bra028856	Bra036161	0.145847
Bra029931	Bra007238	0.145842
Bra026380	Bra040409	0.145834
Bra004901	Bra007188	0.145825
Bra026380	Bra011106	0.145821
Bra015299	Bra028028	0.14581
Bra017170	Bra017545	0.145769
Bra012986	Bra006689	0.145757
Bra040161	Bra040895	0.145728
Bra011664	Bra020000	0.145674
Bra018017	Bra028028	0.145625
Bra007214	Bra023113	0.145611
Bra000929	Bra011664	0.145611
Bra007214	Bra006443	0.145593
Bra014334	Bra026484	0.145549
Bra036919	Bra003882	0.145538
Bra003882	Bra040119	0.145524
Bra009557	Bra012580	0.145523
Bra010787	Bra017170	0.14551
Bra029928	Bra017749	0.145449
Bra002741	Bra030546	0.145419
Bra029167	Bra001298	0.145407
Bra026380	Bra012447	0.14537
Bra015299	Bra007188	0.145352
Bra034799	Bra000193	0.145293
Bra028856	Bra021023	0.145273
Bra001127	Bra009431	0.145247
Bra015299	Bra006443	0.145241
Bra028856	Bra030292	0.145216
Bra012004	Bra020000	0.145215
Bra000929	Bra015299	0.145205
Bra004901	Bra040539	0.145193
Bra019070	Bra033999	0.145183
Bra036117	Bra003512	0.145175
Bra034799	Bra014945	0.145174
Bra019070	Bra033171	0.145163
Bra031673	Bra003270	0.145135
Bra028856	Bra003406	0.145092
Bra034799	Bra028669	0.145082
Bra007214	Bra010620	0.145079
Bra007572	Bra028856	0.145066
Bra009557	Bra009617	0.145053
Bra012004	Bra015299	0.14505
Bra001156	Bra020079	0.145042
Bra009431	Bra034799	0.145031
Bra029771	Bra007188	0.14503
Bra001156	Bra020000	0.145029
Bra029771	Bra008643	0.145022
Bra028856	Bra024895	0.144984
Bra009557	Bra019574	0.144976
Bra030573	Bra003427	0.144976
Bra002741	Bra039703	0.144974
Bra035298	Bra012667	0.144969
Bra006689	Bra010227	0.144966
Bra000929	Bra028856	0.144948
Bra040119	Bra032506	0.144937
Bra019632	Bra003512	0.144933
Bra015299	Bra001156	0.144918
Bra012003	Bra003512	0.144912
Bra026380	Bra028590	0.144908
Bra022969	Bra021898	0.1449
Bra002741	Bra018017	0.14487
Bra000929	Bra033171	0.14487
Bra010787	Bra013915	0.144866
Bra018017	Bra007214	0.144826
Bra034799	Bra040115	0.144799
Bra029931	Bra027910	0.144798
Bra015299	Bra039428	0.144797
Bra026380	Bra019632	0.144762
Bra001156	Bra006689	0.144727
Bra015299	Bra037566	0.144719
Bra026484	Bra038817	0.144697
Bra000929	Bra030546	0.14468
Bra029167	Bra029771	0.144661
Bra008643	Bra001156	0.144643
Bra001306	Bra004901	0.144615
Bra003882	Bra028028	0.144539
Bra005745	Bra015273	0.144537
Bra003882	Bra006689	0.14446
Bra003991	Bra001719	0.144437
Bra001306	Bra012616	0.144394
Bra001156	Bra000193	0.144351
Bra003512	Bra032012	0.144347
Bra017170	Bra028867	0.144321
Bra040119	Bra014472	0.144271
Bra033285	Bra006443	0.144271
Bra011664	Bra016647	0.144243
Bra019070	Bra015273	0.144203
Bra004901	Bra013284	0.144184
Bra031007	Bra003512	0.144175
Bra009557	Bra033171	0.144172
Bra018017	Bra033285	0.14416
Bra029771	Bra022351	0.144154
Bra037859	Bra001156	0.144143
Bra003512	Bra038112	0.144141
Bra028856	Bra039703	0.144116
Bra019632	Bra028263	0.144068
Bra028856	Bra027222	0.144004
Bra004901	Bra023113	0.143968
Bra021990	Bra025058	0.14393
Bra026380	Bra001298	0.143907
Bra029928	Bra034154	0.143855
Bra009557	Bra023511	0.143805
Bra026484	Bra009617	0.143763
Bra033999	Bra016647	0.143734
Bra033171	Bra012986	0.143704
Bra026380	Bra012580	0.143697
Bra019070	Bra032410	0.14368
Bra000929	Bra036117	0.143644
Bra007214	Bra031673	0.143643
Bra001306	Bra014472	0.143592
Bra039703	Bra030546	0.143547
Bra000009	Bra027011	0.143541
Bra012004	Bra024895	0.143536
Bra026380	Bra040539	0.143533
Bra001306	Bra002741	0.143531
Bra037080	Bra034799	0.14352
Bra026380	Bra032410	0.143498
Bra036919	Bra016647	0.143447
Bra029771	Bra014763	0.143431
Bra017170	Bra000853	0.143388
Bra011664	Bra035298	0.143386
Bra033171	Bra033999	0.143385
Bra019070	Bra017545	0.143363
Bra017170	Bra010329	0.143348
Bra002741	Bra004806	0.143333
Bra017170	Bra009431	0.143224
Bra009557	Bra020000	0.143219
Bra036919	Bra023728	0.143172
Bra019070	Bra026484	0.143169
Bra029928	Bra003427	0.143153
Bra031007	Bra016647	0.14314
Bra003991	Bra003381	0.143114
Bra026380	Bra012986	0.143103
Bra017170	Bra036611	0.143068
Bra000853	Bra030546	0.143031
Bra017170	Bra013915	0.142976
Bra012004	Bra028590	0.142944
Bra035298	Bra022978	0.142938
Bra000929	Bra020000	0.142907
Bra002741	Bra040415	0.142896
Bra011664	Bra036117	0.142888
Bra006689	Bra030546	0.142887
Bra001306	Bra020000	0.142886
Bra015299	Bra027986	0.142868
Bra026380	Bra009617	0.142818
Bra017170	Bra014472	0.142812
Bra011664	Bra012667	0.142794
Bra012667	Bra039787	0.142721
Bra017170	Bra012616	0.142696
Bra010787	Bra018017	0.142685
Bra039703	Bra016647	0.142685
Bra017170	Bra040747	0.142665
Bra036117	Bra003882	0.142652
Bra029771	Bra037566	0.142627
Bra019070	Bra008643	0.142614
Bra006689	Bra039703	0.142588
Bra040119	Bra040409	0.142588
Bra009557	Bra017170	0.142552
Bra029931	Bra002524	0.14254
Bra011291	Bra036669	0.142523
Bra029931	Bra001156	0.142473
Bra018017	Bra016555	0.142437
Bra001156	Bra025548	0.142432
Bra017170	Bra012667	0.142428
Bra012004	Bra011106	0.142419
Bra029771	Bra017461	0.142416
Bra018017	Bra013239	0.142411
Bra029167	Bra026484	0.142405
Bra029600	Bra020722	0.142402
Bra040119	Bra020000	0.142367
Bra001127	Bra028778	0.142343
Bra015299	Bra003512	0.142314
Bra029928	Bra006289	0.142301
Bra034799	Bra017749	0.14229
Bra034363	Bra019070	0.14228
Bra019632	Bra004901	0.142271
Bra029928	Bra013915	0.142266
Bra000929	Bra031007	0.142256
Bra034799	Bra020079	0.142253
Bra021294	Bra036111	0.142243
Bra028856	Bra040747	0.142241
Bra012004	Bra007188	0.142238
Bra002741	Bra013239	0.142236
Bra028856	Bra022978	0.142236
Bra034799	Bra021023	0.142223
Bra002741	Bra016647	0.142194
Bra002798	Bra018381	0.142181
Bra015299	Bra034070	0.142179
Bra008643	Bra003512	0.142079
Bra019632	Bra029931	0.142068
Bra003808	Bra017170	0.142038
Bra017170	Bra012012	0.142022
Bra012916	Bra031673	0.141933
Bra017170	Bra027986	0.141923
Bra000929	Bra026484	0.141899
Bra007214	Bra007238	0.14188
Bra033171	Bra028028	0.141831
Bra019070	Bra012447	0.141804
Bra009557	Bra000443	0.141796
Bra011664	Bra028590	0.141794
Bra029771	Bra033171	0.141781
Bra020079	Bra016647	0.141761
Bra007572	Bra002741	0.141759
Bra029931	Bra034070	0.14174
Bra033171	Bra014472	0.141736
Bra037566	Bra003882	0.141724
Bra003808	Bra013284	0.141704
Bra011106	Bra004901	0.141692
Bra028263	Bra030292	0.141691
Bra011664	Bra030573	0.141669
Bra018017	Bra003427	0.141642
Bra033999	Bra001156	0.141599
Bra034799	Bra037859	0.141595
Bra028856	Bra014472	0.141561
Bra018017	Bra001911	0.141507
Bra015299	Bra002741	0.141469
Bra029931	Bra031673	0.141469
Bra011664	Bra014472	0.141463
Bra001306	Bra009557	0.141453
Bra036710	Bra022484	0.141415
Bra029928	Bra009431	0.141411
Bra028263	Bra011350	0.141393
Bra029928	Bra014743	0.141386
Bra028856	Bra013239	0.141377
Bra019632	Bra028856	0.14131
Bra007214	Bra008713	0.141294
Bra036919	Bra007188	0.141201
Bra036919	Bra015299	0.14119
Bra012667	Bra000501	0.141177
Bra000853	Bra025548	0.141131
Bra000929	Bra029931	0.141119
Bra026484	Bra040415	0.141115
Bra011664	Bra010620	0.14111
Bra010227	Bra030546	0.141081
Bra004901	Bra040409	0.141066
Bra033171	Bra010227	0.140973
Bra010787	Bra004901	0.140966
Bra009431	Bra028778	0.140963
Bra029931	Bra013284	0.140935
Bra029931	Bra040895	0.140853
Bra010787	Bra023113	0.140851
Bra004901	Bra006340	0.140839
Bra030573	Bra028856	0.140804
Bra029931	Bra020280	0.14078
Bra019070	Bra014472	0.140769
Bra010329	Bra034799	0.140755
Bra012004	Bra003951	0.140754
Bra005745	Bra016647	0.140741
Bra012004	Bra010227	0.140735
Bra003512	Bra015273	0.140715
Bra029167	Bra030546	0.14069
Bra021023	Bra023113	0.140658
Bra015299	Bra033999	0.140655
Bra001306	Bra036919	0.140647
Bra007214	Bra036285	0.140641
Bra000501	Bra035980	0.140611
Bra015299	Bra036117	0.1406
Bra028856	Bra001156	0.14057
Bra028856	Bra040119	0.14057
Bra028263	Bra035939	0.140534
Bra029931	Bra028590	0.140533
Bra029771	Bra028856	0.140525
Bra017170	Bra040539	0.140521
Bra028856	Bra039428	0.140513
Bra010455	Bra035980	0.140513
Bra036919	Bra017170	0.140482
Bra003882	Bra039703	0.140477
Bra002741	Bra010227	0.140466
Bra033999	Bra028028	0.140424
Bra005180	Bra032135	0.140407
Bra002741	Bra024895	0.140402
Bra009557	Bra015273	0.140393
Bra029931	Bra010227	0.140386
Bra002741	Bra036161	0.14037
Bra036919	Bra040119	0.140353
Bra002741	Bra032410	0.140343
Bra013284	Bra040747	0.140337
Bra023113	Bra035980	0.140329
Bra026380	Bra010227	0.140324
Bra011664	Bra023113	0.140318
Bra028856	Bra003047	0.140315
Bra029931	Bra013915	0.1402
Bra012004	Bra012986	0.140156
Bra012004	Bra017545	0.140123
Bra013284	Bra022760	0.140114
Bra011664	Bra022978	0.140108
Bra004901	Bra018017	0.140085
Bra011664	Bra030787	0.140011
Bra004901	Bra030573	0.139947
Bra009431	Bra015336	0.139927
Bra030573	Bra016647	0.139911
Bra035298	Bra035980	0.139899
Bra001306	Bra012580	0.139817
Bra036919	Bra020000	0.139795
Bra015299	Bra030546	0.139779
Bra011664	Bra037917	0.139759
Bra018017	Bra028669	0.139757
Bra026380	Bra006595	0.139757
Bra025058	Bra035895	0.13975
Bra028856	Bra012580	0.139737
Bra034799	Bra036285	0.139724
Bra040161	Bra031682	0.139701
Bra029931	Bra001052	0.139667
Bra019070	Bra019574	0.139646
Bra026380	Bra014334	0.139623
Bra000929	Bra036611	0.139592
Bra011106	Bra007188	0.139581
Bra010787	Bra028856	0.139573
Bra009557	Bra014472	0.139567
Bra015299	Bra007214	0.139548
Bra029112	Bra011551	0.139517
Bra040409	Bra000853	0.139502
Bra034799	Bra022978	0.139493
Bra019070	Bra029984	0.139492
Bra029771	Bra017749	0.139462
Bra012986	Bra016647	0.139458
Bra017170	Bra032410	0.139437
Bra036710	Bra002741	0.139436
Bra000929	Bra020079	0.13941
Bra001127	Bra025058	0.139392
Bra029771	Bra016555	0.139388
Bra029600	Bra035629	0.139387
Bra019070	Bra020000	0.139376
Bra009557	Bra028028	0.139351
Bra026380	Bra007188	0.139328
Bra040895	Bra031682	0.139294
Bra019070	Bra006595	0.139273
Bra026484	Bra030546	0.139253
Bra012004	Bra028867	0.139247
Bra028856	Bra037917	0.139243
Bra005180	Bra018381	0.139228
Bra033171	Bra034070	0.139189
Bra012004	Bra030573	0.139185
Bra026380	Bra016647	0.139178
Bra018017	Bra032506	0.139131
Bra029928	Bra029752	0.139125
Bra013284	Bra018381	0.139118
Bra034799	Bra026484	0.139083
Bra015299	Bra028263	0.138964
Bra029600	Bra031202	0.138953
Bra029167	Bra019574	0.138919
Bra029931	Bra016555	0.138873
Bra040119	Bra001156	0.138846
Bra012004	Bra026484	0.138843
Bra018017	Bra040539	0.138821
Bra029928	Bra034364	0.138796
Bra040119	Bra031007	0.138784
Bra000193	Bra003512	0.138732
Bra007188	Bra030292	0.138717
Bra033171	Bra028590	0.138702
Bra022978	Bra023052	0.138698
Bra000501	Bra001052	0.138672
Bra008030	Bra022978	0.138666
Bra011350	Bra026484	0.138656
Bra022878	Bra031682	0.13865
Bra002411	Bra003512	0.138635
Bra012004	Bra032506	0.138626
Bra030573	Bra040409	0.138616
Bra031673	Bra008713	0.138613
Bra015299	Bra000501	0.138592
Bra033285	Bra029752	0.13859
Bra000009	Bra034356	0.138587
Bra017170	Bra038628	0.138583
Bra015299	Bra012616	0.138582
Bra028856	Bra036285	0.13857
Bra004901	Bra003882	0.13856
Bra017170	Bra032017	0.138534
Bra017170	Bra000009	0.138533
Bra036919	Bra013239	0.138524
Bra029752	Bra021722	0.13851
Bra010227	Bra016647	0.138504
Bra029928	Bra006443	0.138503
Bra036611	Bra026484	0.138493
Bra012004	Bra019632	0.138483
Bra029931	Bra040119	0.138436
Bra012004	Bra039428	0.138422
Bra001156	Bra032506	0.138378
Bra029931	Bra035083	0.138377
Bra029928	Bra036707	0.138361
Bra015299	Bra012667	0.138342
Bra011664	Bra001156	0.138337
Bra007188	Bra003882	0.138333
Bra028856	Bra013284	0.138285
Bra015299	Bra040747	0.138283
Bra034799	Bra025548	0.138272
Bra036919	Bra007214	0.138256
Bra022978	Bra035980	0.138246
Bra004901	Bra034070	0.138227
Bra021990	Bra009431	0.138226
Bra007214	Bra003047	0.138217
Bra002290	Bra000193	0.138196
Bra014334	Bra034799	0.138144
Bra023113	Bra001911	0.138132
Bra007188	Bra036161	0.138104
Bra011664	Bra029752	0.138104
Bra012004	Bra038628	0.13809
Bra001306	Bra028263	0.138076
Bra029928	Bra012809	0.138034
Bra000009	Bra014763	0.138002
Bra013905	Bra011291	0.137967
Bra036919	Bra018017	0.13796
Bra029771	Bra011106	0.137952
Bra029931	Bra029752	0.137921
Bra007214	Bra010227	0.137882
Bra026484	Bra012580	0.137872
Bra029771	Bra010329	0.137841
Bra011664	Bra007214	0.137834
Bra026484	Bra016647	0.137813
Bra007188	Bra012012	0.137809
Bra013905	Bra035980	0.137782
Bra028856	Bra006689	0.137761
Bra018017	Bra027222	0.137724
Bra012667	Bra022978	0.137685
Bra017170	Bra001127	0.137602
Bra028263	Bra012616	0.13759
Bra002741	Bra003882	0.137575
Bra015299	Bra030573	0.137556
Bra017170	Bra035939	0.137543
Bra009431	Bra025058	0.137531
Bra012667	Bra023113	0.137528
Bra017170	Bra027224	0.137389
Bra019070	Bra028028	0.137381
Bra004901	Bra039428	0.137359
Bra018669	Bra007214	0.137325
Bra003406	Bra004806	0.137305
Bra034799	Bra032017	0.137264
Bra029928	Bra013114	0.137261
Bra011664	Bra033285	0.137242
Bra015299	Bra028590	0.137238
Bra012616	Bra028856	0.137211
Bra018017	Bra010620	0.137205
Bra015299	Bra039703	0.137193
Bra029771	Bra021990	0.137191
Bra021023	Bra035980	0.137184
Bra011291	Bra022978	0.13717
Bra008030	Bra023113	0.137128
Bra013915	Bra013284	0.137098
Bra036611	Bra016647	0.137018
Bra007214	Bra013887	0.136999
Bra040539	Bra005745	0.136993
Bra030573	Bra032828	0.136986
Bra002290	Bra001156	0.13696
Bra024541	Bra029931	0.136956
Bra033171	Bra024895	0.136954
Bra033285	Bra016647	0.136943
Bra033171	Bra030573	0.1369
Bra035939	Bra001156	0.136893
Bra019070	Bra018017	0.136892
Bra007188	Bra033999	0.136885
Bra011664	Bra039428	0.136872
Bra001156	Bra032410	0.136858
Bra036919	Bra032506	0.136853
Bra010787	Bra009431	0.136852
Bra004806	Bra030546	0.136846
Bra019070	Bra038817	0.136836
Bra025058	Bra018381	0.136828
Bra029928	Bra023511	0.136828
Bra000929	Bra002741	0.136771
Bra002524	Bra035980	0.136766
Bra031673	Bra040895	0.136763
Bra033171	Bra030546	0.136755
Bra016647	Bra038817	0.136722
Bra028856	Bra038503	0.136706
Bra003882	Bra009617	0.136685
Bra018017	Bra039787	0.136678
Bra013284	Bra023113	0.136676
Bra003882	Bra015273	0.136662
Bra029931	Bra020000	0.136654
Bra012004	Bra015273	0.136649
Bra004901	Bra004806	0.136641
Bra028263	Bra040415	0.136635
Bra033171	Bra039428	0.136628
Bra034363	Bra028263	0.136598
Bra000009	Bra002798	0.136558
Bra029771	Bra022484	0.136523
Bra004901	Bra032828	0.136499
Bra003991	Bra031202	0.136483
Bra010455	Bra022978	0.136458
Bra022978	Bra036669	0.136393
Bra017170	Bra017461	0.136383
Bra012986	Bra040409	0.136378
Bra016913	Bra034799	0.136362
Bra029771	Bra028778	0.136361
Bra015299	Bra039787	0.136358
Bra037566	Bra004806	0.136351
Bra002290	Bra034799	0.136349
Bra011664	Bra010227	0.136348
Bra017070	Bra034356	0.136325
Bra009557	Bra012986	0.136281
Bra034799	Bra003427	0.136277
Bra029771	Bra033999	0.136254
Bra033999	Bra010227	0.136239
Bra002741	Bra008643	0.136227
Bra003951	Bra035939	0.136216
Bra029931	Bra006443	0.136086
Bra000929	Bra005745	0.136085
Bra012004	Bra029984	0.136079
Bra012986	Bra000853	0.136077
Bra028263	Bra001298	0.136076
Bra007214	Bra011291	0.136069
Bra036919	Bra011664	0.136066
Bra004901	Bra028856	0.136053
Bra012616	Bra030546	0.136033
Bra002741	Bra028590	0.136032
Bra029112	Bra001098	0.136023
Bra018017	Bra037859	0.13602
Bra005258	Bra016555	0.136007
Bra001156	Bra031166	0.135995
Bra040895	Bra035650	0.135993
Bra033285	Bra003512	0.13599
Bra000929	Bra015273	0.135975
Bra033285	Bra001052	0.135974
Bra003512	Bra009404	0.135968
Bra003808	Bra003991	0.135959
Bra035939	Bra012580	0.135941
Bra036919	Bra012667	0.135921
Bra030573	Bra016555	0.135917
Bra015299	Bra021023	0.135912
Bra033171	Bra004806	0.135887
Bra018017	Bra038503	0.135887
Bra006689	Bra038817	0.135873
Bra004901	Bra012447	0.135829
Bra029928	Bra038112	0.135804
Bra018017	Bra035298	0.135785
Bra030573	Bra012667	0.135767
Bra004901	Bra038628	0.135749
Bra021294	Bra006629	0.135713
Bra029167	Bra004901	0.135696
Bra009557	Bra000193	0.135667
Bra036710	Bra028867	0.135655
Bra024541	Bra017170	0.135652
Bra018017	Bra039703	0.135652
Bra001156	Bra010227	0.135642
Bra011664	Bra023052	0.135625
Bra030787	Bra034799	0.135613
Bra034799	Bra031007	0.135573
Bra034070	Bra005745	0.135567
Bra006689	Bra038628	0.135558
Bra012616	Bra018017	0.135545
Bra002741	Bra016555	0.135532
Bra004901	Bra001298	0.135524
Bra003808	Bra029771	0.135521
Bra029600	Bra026164	0.135516
Bra029931	Bra037920	0.135503
Bra033171	Bra000853	0.135479
Bra015299	Bra013239	0.13541
Bra004901	Bra022484	0.135397
Bra029984	Bra006689	0.135396
Bra029771	Bra028590	0.135356
Bra018017	Bra000193	0.135348
Bra028263	Bra022484	0.135314
Bra002741	Bra023113	0.135291
Bra018017	Bra006443	0.135157
Bra037917	Bra022978	0.13515
Bra028856	Bra001052	0.135131
Bra026484	Bra004806	0.13512
Bra018017	Bra008643	0.135119
Bra034799	Bra035980	0.135092
Bra034363	Bra026484	0.135081
Bra029928	Bra021387	0.135055
Bra003882	Bra017545	0.135033
Bra018017	Bra030787	0.135023
Bra029931	Bra000135	0.13502
Bra040747	Bra023113	0.13502
Bra030787	Bra001156	0.13499
Bra019070	Bra020079	0.134988
Bra017170	Bra007214	0.134983
Bra031673	Bra022978	0.134976
Bra018017	Bra013915	0.134972
Bra029928	Bra005258	0.134917
Bra029928	Bra038503	0.13491
Bra007188	Bra013239	0.134906
Bra029928	Bra031034	0.134844
Bra010455	Bra000501	0.134822
Bra003882	Bra005745	0.13482
Bra018017	Bra036611	0.134818
Bra012004	Bra000193	0.134814
Bra009431	Bra010329	0.134811
Bra006689	Bra016647	0.134811
Bra000853	Bra015273	0.134773
Bra036117	Bra001156	0.134767
Bra028856	Bra039787	0.134762
Bra029928	Bra032828	0.134761
Bra005180	Bra017070	0.134748
Bra012004	Bra036710	0.134741
Bra028263	Bra006443	0.134723
Bra034799	Bra012012	0.134677
Bra015299	Bra012580	0.134667
Bra040119	Bra000853	0.134659
Bra040409	Bra027986	0.134643
Bra031673	Bra036669	0.134642
Bra040119	Bra012580	0.134627
Bra018017	Bra004806	0.134621
Bra028856	Bra023728	0.134609
Bra029931	Bra036117	0.1346
Bra001306	Bra040119	0.134598
Bra029928	Bra023728	0.134553
Bra019070	Bra025548	0.134537
Bra000929	Bra040539	0.134506
Bra028263	Bra033285	0.134489
Bra009557	Bra031007	0.134487
Bra009557	Bra036707	0.13448
Bra031673	Bra021773	0.134466
Bra007188	Bra003406	0.13444
Bra009557	Bra040409	0.13439
Bra029167	Bra032410	0.134388
Bra036919	Bra028028	0.134364
Bra015299	Bra022978	0.134362
Bra024895	Bra023113	0.134325
Bra007188	Bra007214	0.134313
Bra009557	Bra012370	0.134282
Bra006661	Bra011664	0.134258
Bra034799	Bra021722	0.134252
Bra029931	Bra001127	0.134227
Bra029771	Bra007572	0.134224
Bra029928	Bra012003	0.134213
Bra001306	Bra027986	0.134179
Bra033999	Bra039703	0.134175
Bra037566	Bra030546	0.134152
Bra029771	Bra018017	0.13415
Bra028856	Bra004806	0.134136
Bra039703	Bra004806	0.13412
Bra035939	Bra006689	0.134086
Bra015299	Bra038503	0.134076
Bra001127	Bra034799	0.134073
Bra003512	Bra000443	0.134066
Bra040115	Bra016647	0.134048
Bra000929	Bra004901	0.134043
Bra002524	Bra031673	0.134033
Bra011664	Bra040145	0.134004
Bra029931	Bra030787	0.134004
Bra012004	Bra008643	0.133998
Bra040119	Bra003512	0.133998
Bra029752	Bra016647	0.133983
Bra019070	Bra039703	0.133925
Bra040539	Bra003882	0.133918
Bra029771	Bra001156	0.1339
Bra012004	Bra036117	0.133835
Bra000929	Bra035939	0.133797
Bra012004	Bra011350	0.133783
Bra012667	Bra016647	0.133768
Bra005745	Bra000853	0.133764
Bra006689	Bra000853	0.133704
Bra026484	Bra032012	0.133694
Bra012616	Bra004806	0.133677
Bra032410	Bra016647	0.133613
Bra016555	Bra005745	0.133604
Bra015299	Bra040119	0.133589
Bra003406	Bra030546	0.133587
Bra040119	Bra025548	0.133575
Bra031673	Bra021294	0.133556
Bra028856	Bra007238	0.133534
Bra029928	Bra001911	0.133481
Bra003406	Bra016647	0.13347
Bra033285	Bra012667	0.133468
Bra033285	Bra010227	0.133423
Bra022978	Bra001911	0.133392
Bra040409	Bra030546	0.133383
Bra003882	Bra031007	0.13338
Bra007214	Bra008030	0.133357
Bra036611	Bra000853	0.133343
Bra022978	Bra021023	0.13332
Bra015299	Bra035980	0.13331
Bra006289	Bra016647	0.133309
Bra011664	Bra023728	0.133303
Bra018017	Bra040747	0.133288
Bra015299	Bra029752	0.133277
Bra029928	Bra013284	0.133271
Bra001306	Bra036611	0.133262
Bra035629	Bra025058	0.133235
Bra026380	Bra020079	0.133207
Bra036919	Bra033171	0.1332
Bra035298	Bra037917	0.133199
Bra009557	Bra009404	0.133193
Bra034799	Bra037917	0.133184
Bra033171	Bra013239	0.133173
Bra012667	Bra035980	0.133167
Bra004901	Bra032410	0.133156
Bra033285	Bra000501	0.13311
Bra039787	Bra022978	0.133103
Bra017170	Bra005258	0.133096
Bra006289	Bra040119	0.133086
Bra006595	Bra026484	0.133082
Bra018017	Bra021023	0.133075
Bra002290	Bra016647	0.13307
Bra029771	Bra032017	0.133049
Bra011664	Bra003427	0.133042
Bra004901	Bra033999	0.133036
Bra013905	Bra036669	0.132996
Bra029931	Bra037859	0.132988
Bra011291	Bra035980	0.13298
Bra003882	Bra025548	0.132963
Bra017170	Bra040415	0.132933
Bra010455	Bra036669	0.13288
Bra035298	Bra040895	0.132862
Bra026484	Bra038628	0.132858
Bra000929	Bra000193	0.13285
Bra001306	Bra030546	0.132844
Bra001306	Bra028590	0.132795
Bra029931	Bra007188	0.132789
Bra000929	Bra012986	0.132777
Bra036117	Bra030546	0.132767
Bra007572	Bra023113	0.132762
Bra040409	Bra006689	0.13276
Bra011291	Bra021023	0.132755
Bra001306	Bra030573	0.132703
Bra012667	Bra029752	0.132687
Bra026380	Bra014472	0.132659
Bra009431	Bra013284	0.132656
Bra036611	Bra035939	0.132649
Bra029600	Bra000009	0.132629
Bra028263	Bra018017	0.132607
Bra007572	Bra018017	0.132593
Bra036919	Bra012580	0.132514
Bra029928	Bra007214	0.132499
Bra034070	Bra040119	0.132497
Bra028263	Bra016647	0.132438
Bra002741	Bra005745	0.132437
Bra028856	Bra018487	0.132418
Bra009404	Bra016647	0.13241
Bra031166	Bra016647	0.132406
Bra030573	Bra003882	0.132403
Bra001306	Bra031007	0.132379
Bra036710	Bra022351	0.132373
Bra018226	Bra003512	0.132345
Bra004901	Bra014763	0.132323
Bra036919	Bra006289	0.132317
Bra021990	Bra001127	0.132313
Bra035939	Bra004806	0.132301
Bra029167	Bra036611	0.132284
Bra001306	Bra012986	0.13228
Bra029167	Bra003882	0.132262
Bra019070	Bra001298	0.132246
Bra017070	Bra035629	0.132239
Bra034799	Bra001298	0.132231
Bra029771	Bra001306	0.132221
Bra029771	Bra019632	0.132219
Bra015273	Bra016647	0.132214
Bra007214	Bra006629	0.132214
Bra033171	Bra023113	0.132207
Bra034154	Bra003512	0.1322
Bra005180	Bra031202	0.132188
Bra012667	Bra024895	0.132178
Bra007214	Bra028669	0.132166
Bra017170	Bra021023	0.132166
Bra016647	Bra009617	0.132148
Bra017170	Bra029984	0.132143
Bra015299	Bra003406	0.132143
Bra007188	Bra006443	0.132134
Bra033171	Bra007188	0.132108
Bra015299	Bra004901	0.132097
Bra036710	Bra004806	0.132086
Bra035298	Bra036669	0.132081
Bra040415	Bra016647	0.132065
Bra012986	Bra005745	0.132049
Bra010787	Bra024895	0.132047
Bra004901	Bra038503	0.132043
Bra007214	Bra040895	0.131931
Bra012004	Bra025548	0.131924
Bra014387	Bra012694	0.131912
Bra010455	Bra006629	0.131908
Bra029771	Bra013284	0.131888
Bra036919	Bra004475	0.131885
Bra028263	Bra032410	0.131882
Bra005258	Bra001127	0.131867
Bra003882	Bra026484	0.131846
Bra018017	Bra000501	0.13183
Bra012809	Bra004901	0.131825
Bra011664	Bra000853	0.131816
Bra028263	Bra017461	0.131785
Bra001156	Bra032828	0.131779
Bra029928	Bra030292	0.131779
Bra003991	Bra000009	0.131767
Bra018017	Bra005745	0.131754
Bra015299	Bra000159	0.131754
Bra011291	Bra040895	0.131734
Bra011350	Bra038628	0.131713
Bra001156	Bra040415	0.131705
Bra029771	Bra006340	0.131701
Bra036919	Bra028263	0.13168
Bra029928	Bra036285	0.131678
Bra021294	Bra021773	0.131673
Bra040119	Bra015319	0.131656
Bra001156	Bra039703	0.131641
Bra003808	Bra004901	0.131625
Bra006289	Bra004722	0.131617
Bra035298	Bra023113	0.131608
Bra029931	Bra037566	0.1316
Bra003882	Bra032506	0.131588
Bra012616	Bra006689	0.131579
Bra026484	Bra020079	0.131571
Bra002524	Bra040161	0.131567
Bra026380	Bra020000	0.131542
Bra012667	Bra036285	0.13154
Bra034363	Bra038628	0.131512
Bra011664	Bra032506	0.131512
Bra031007	Bra026484	0.131505
Bra013239	Bra016647	0.131491
Bra017170	Bra003047	0.131452
Bra034799	Bra004475	0.131441
Bra013284	Bra014945	0.131419
Bra033171	Bra012616	0.131354
Bra000853	Bra020079	0.131341
Bra028856	Bra010620	0.131259
Bra035939	Bra030546	0.131256
Bra038503	Bra023113	0.13122
Bra028856	Bra012986	0.131219
Bra036919	Bra035298	0.131193
Bra014763	Bra003512	0.131187
Bra004901	Bra025058	0.131186
Bra007572	Bra028263	0.131175
Bra011664	Bra024895	0.131107
Bra029928	Bra018689	0.131105
Bra000929	Bra039428	0.131105
Bra028263	Bra037348	0.131072
Bra010227	Bra004806	0.131063
Bra033999	Bra026484	0.131032
Bra011664	Bra030546	0.131023
Bra015299	Bra006689	0.131007
Bra002524	Bra036669	0.130971
Bra012616	Bra000853	0.130963
Bra002741	Bra028867	0.130954
Bra026484	Bra034364	0.130942
Bra019070	Bra011106	0.130926
Bra031682	Bra003270	0.130906
Bra004901	Bra040415	0.130859
Bra029931	Bra031682	0.130859
Bra002741	Bra001298	0.130844
Bra034070	Bra028590	0.130838
Bra029167	Bra005745	0.130834
Bra027285	Bra003512	0.130808
Bra017070	Bra031202	0.130805
Bra015299	Bra035298	0.130762
Bra029928	Bra014763	0.130758
Bra013915	Bra023113	0.130751
Bra017170	Bra015273	0.130735
Bra026380	Bra015273	0.130733
Bra017170	Bra028669	0.13072
Bra004806	Bra016647	0.130707
Bra029600	Bra017070	0.130707
Bra005745	Bra026484	0.13068
Bra028263	Bra003951	0.130675
Bra024541	Bra015299	0.130626
Bra015299	Bra023052	0.130623
Bra026380	Bra013239	0.130621
Bra010455	Bra040895	0.13058
Bra022978	Bra040145	0.130578
Bra029771	Bra012986	0.130547
Bra028856	Bra017545	0.130545
Bra033171	Bra027986	0.13052
Bra029928	Bra022351	0.130465
Bra002741	Bra030292	0.130464
Bra025058	Bra031093	0.130459
Bra019070	Bra018226	0.130457
Bra019070	Bra007188	0.130435
Bra033285	Bra003882	0.130432
Bra040409	Bra005745	0.130413
Bra017170	Bra008030	0.130411
Bra000501	Bra036669	0.130389
Bra014334	Bra003882	0.130374
Bra029771	Bra013915	0.130366
Bra012004	Bra016555	0.130362
Bra030573	Bra034070	0.130358
Bra006689	Bra036161	0.130342
Bra002524	Bra011291	0.130334
Bra029928	Bra027224	0.130334
Bra012447	Bra005745	0.130318
Bra019070	Bra028856	0.130312
Bra000929	Bra036919	0.13031
Bra019070	Bra019632	0.130305
Bra014472	Bra000853	0.130302
Bra033285	Bra021722	0.130234
Bra007188	Bra016647	0.130227
Bra010455	Bra012667	0.13022
Bra007214	Bra002524	0.130184
Bra017170	Bra017749	0.13018
Bra029771	Bra003882	0.13016
Bra018017	Bra018689	0.130132
Bra037080	Bra028856	0.130132
Bra003808	Bra034799	0.130118
Bra011664	Bra012986	0.130085
Bra010455	Bra040161	0.130071
Bra013284	Bra028669	0.13006
Bra022484	Bra006689	0.130059
Bra003882	Bra027222	0.130053
Bra009557	Bra032506	0.130039
Bra028856	Bra021722	0.130032
Bra017170	Bra038817	0.130016
Bra036919	Bra009617	0.130015
Bra019550	Bra025165	0.130013
Bra001306	Bra006689	0.130009
Bra031673	Bra021517	0.130009
Bra039428	Bra016647	0.130006
Bra036710	Bra018226	0.13
Bra000929	Bra006689	0.129972
Bra009557	Bra031166	0.129969
Bra030573	Bra037859	0.129961
Bra029931	Bra023728	0.129955
Bra014472	Bra005745	0.129945
Bra003808	Bra002798	0.129937
Bra029931	Bra016647	0.129933
Bra000929	Bra037566	0.129909
Bra029771	Bra005745	0.129887
Bra002741	Bra033285	0.129847
Bra040539	Bra026484	0.129846
Bra035298	Bra031673	0.12983
Bra004901	Bra014472	0.12983
Bra034799	Bra031166	0.129829
Bra028590	Bra005745	0.129791
Bra029167	Bra012447	0.129765
Bra003951	Bra003882	0.129762
Bra026380	Bra014763	0.129744
Bra017461	Bra006689	0.12974
Bra028263	Bra014763	0.129717
Bra029112	Bra033285	0.129678
Bra012616	Bra040119	0.129668
Bra026380	Bra034154	0.129665
Bra002741	Bra019574	0.129661
Bra009557	Bra031034	0.129655
Bra012004	Bra001298	0.129629
Bra033285	Bra036285	0.129622
Bra019632	Bra004806	0.129619
Bra012004	Bra012447	0.12961
Bra018017	Bra029752	0.129595
Bra033171	Bra027222	0.129595
Bra004901	Bra000853	0.129592
Bra030573	Bra015273	0.129591
Bra002741	Bra013284	0.129551
Bra039428	Bra024895	0.129541
Bra002524	Bra040895	0.129537
Bra014334	Bra016647	0.129526
Bra028263	Bra003662	0.129521
Bra012667	Bra010227	0.129509
Bra019574	Bra004806	0.1295
Bra026380	Bra034364	0.129499
Bra009557	Bra029106	0.129496
Bra026380	Bra017461	0.129479
Bra028856	Bra016555	0.129459
Bra029931	Bra032828	0.129447
Bra017170	Bra010694	0.129371
Bra035980	Bra037920	0.129349
Bra032506	Bra030546	0.12932
Bra026380	Bra012003	0.129316
Bra029771	Bra009431	0.129292
Bra033171	Bra015273	0.129287
Bra040161	Bra036111	0.129266
Bra034363	Bra028867	0.129243
Bra007188	Bra004806	0.129238
Bra019070	Bra012580	0.129232
Bra003406	Bra001156	0.129224
Bra039428	Bra012667	0.129185
Bra034799	Bra010620	0.129185
Bra000501	Bra037920	0.129132
Bra017170	Bra036117	0.129129
Bra036611	Bra006689	0.129126
Bra011106	Bra028856	0.129119
Bra035939	Bra000853	0.129114
Bra001156	Bra004806	0.129105
Bra030573	Bra018689	0.129096
Bra029167	Bra007188	0.129074
Bra036611	Bra040409	0.129059
Bra029931	Bra030292	0.129057
Bra010787	Bra007214	0.129033
Bra004901	Bra016647	0.129028
Bra009557	Bra013114	0.12901
Bra036710	Bra006340	0.128964
Bra012667	Bra000159	0.128945
Bra026484	Bra032506	0.128942
Bra015299	Bra012986	0.12894
Bra028263	Bra001156	0.128939
Bra007188	Bra001156	0.128939
Bra036117	Bra012667	0.128928
Bra011664	Bra037859	0.128919
Bra004901	Bra030546	0.1289
Bra013239	Bra030546	0.128887
Bra018017	Bra012580	0.128885
Bra020079	Bra030546	0.128884
Bra035629	Bra018381	0.128884
Bra036111	Bra003270	0.12886
Bra003882	Bra024895	0.128853
Bra028669	Bra023113	0.128819
Bra010787	Bra001127	0.128807
Bra002741	Bra038817	0.128789
Bra010787	Bra013284	0.128788
Bra029600	Bra034356	0.128763
Bra005258	Bra001156	0.128763
Bra002741	Bra017461	0.128762
Bra035298	Bra021023	0.12874
Bra003951	Bra016647	0.128706
Bra036919	Bra000501	0.128693
Bra017749	Bra003512	0.128673
Bra002741	Bra010329	0.128663
Bra009557	Bra013239	0.128656
Bra017545	Bra016647	0.128639
Bra037348	Bra011350	0.12862
Bra029600	Bra013284	0.128615
Bra019632	Bra002741	0.128579
Bra003951	Bra006689	0.128578
Bra001444	Bra015336	0.128578
Bra004806	Bra028867	0.128577
Bra034799	Bra028778	0.128572
Bra003991	Bra016062	0.128562
Bra007188	Bra013284	0.128558
Bra017070	Bra035895	0.128557
Bra006689	Bra012012	0.12854
Bra018017	Bra035980	0.128508
Bra005258	Bra034799	0.128497
Bra000853	Bra032506	0.128454
Bra015131	Bra035980	0.128438
Bra011106	Bra003406	0.12843
Bra022978	Bra020280	0.128407
Bra028263	Bra014743	0.128388
Bra034070	Bra026484	0.128382
Bra011664	Bra007238	0.128382
Bra035298	Bra008030	0.128379
Bra007214	Bra040747	0.128365
Bra005180	Bra036710	0.128358
Bra007188	Bra030546	0.128358
Bra031166	Bra003512	0.128341
Bra011350	Bra004806	0.128312
Bra008643	Bra005745	0.128309
Bra010455	Bra003270	0.128294
Bra004901	Bra002411	0.128291
Bra028856	Bra040539	0.128272
Bra029984	Bra016647	0.128249
Bra002741	Bra040539	0.128238
Bra011664	Bra001911	0.128228
Bra029928	Bra008030	0.128219
Bra034799	Bra032828	0.128216
Bra003808	Bra028263	0.128214
Bra007572	Bra001156	0.128213
Bra006289	Bra032506	0.128149
Bra000501	Bra023113	0.128142
Bra029931	Bra008713	0.128108
Bra026380	Bra018017	0.128107
Bra006689	Bra011350	0.128088
Bra040409	Bra028590	0.128085
Bra012667	Bra001156	0.128073
Bra002741	Bra038628	0.128056
Bra029931	Bra012986	0.128037
Bra002741	Bra029931	0.128036
Bra026380	Bra015299	0.12801
Bra029928	Bra005820	0.128009
Bra029928	Bra000501	0.127995
Bra022978	Bra010620	0.127972
Bra024541	Bra028856	0.127956
Bra017170	Bra014763	0.127953
Bra007188	Bra039703	0.127951
Bra002741	Bra018226	0.127944
Bra028856	Bra028669	0.127935
Bra001127	Bra022760	0.127933
Bra012004	Bra031007	0.127927
Bra012667	Bra021023	0.127925
Bra015131	Bra023052	0.12792
Bra030573	Bra028590	0.127902
Bra020000	Bra030546	0.127896
[truncated: 2,933 more rows]

## Sheet: greenyellow
fromNode	toNode	weight
Bra000321	Bra039006	0.364334
Bra028896	Bra039006	0.349521
Bra028896	Bra000321	0.349341
Bra039006	Bra007620	0.348705
Bra017233	Bra016653	0.343283
Bra010194	Bra016653	0.340191
Bra016653	Bra013763	0.338799
Bra032555	Bra039006	0.335265
Bra025984	Bra016653	0.33192
Bra016607	Bra016653	0.330863
Bra016653	Bra002822	0.324837
Bra015693	Bra016653	0.320753
Bra002245	Bra039006	0.316363
Bra025984	Bra013763	0.313223
Bra002245	Bra028896	0.311951
Bra037808	Bra027996	0.311141
Bra015693	Bra002332	0.311086
Bra017233	Bra013763	0.30932
Bra025984	Bra017233	0.308585
Bra016607	Bra017233	0.308118
Bra002245	Bra007620	0.304981
Bra025984	Bra002822	0.302698
Bra000340	Bra016653	0.301577
Bra002332	Bra016653	0.299456
Bra015252	Bra031873	0.297895
Bra010669	Bra031873	0.290711
Bra010194	Bra025984	0.290331
Bra015693	Bra010194	0.288295
Bra010194	Bra017233	0.288176
Bra010194	Bra013763	0.28807
Bra010194	Bra000340	0.287419
Bra013763	Bra002822	0.287193
Bra002245	Bra000321	0.28675
Bra028896	Bra032555	0.28516
Bra016607	Bra025984	0.284601
Bra020576	Bra016653	0.28425
Bra028896	Bra007620	0.284168
Bra037808	Bra031873	0.281222
Bra020519	Bra002245	0.280623
Bra015693	Bra002942	0.277251
Bra015656	Bra016653	0.276656
Bra016607	Bra010194	0.27638
Bra002332	Bra013763	0.276366
Bra002245	Bra026533	0.275869
Bra015693	Bra013763	0.274385
Bra019722	Bra007620	0.273912
Bra010194	Bra002822	0.272486
Bra020576	Bra010194	0.271706
Bra028543	Bra016653	0.271246
Bra003738	Bra016653	0.271146
Bra019722	Bra002245	0.271063
Bra020529	Bra039006	0.269436
Bra025407	Bra027996	0.268979
Bra015252	Bra010669	0.268103
Bra002245	Bra032555	0.267951
Bra002245	Bra020529	0.267685
Bra025407	Bra037808	0.267509
Bra002245	Bra036857	0.267217
Bra016607	Bra013763	0.266844
Bra028543	Bra015656	0.265751
Bra028543	Bra002332	0.263897
Bra020576	Bra025984	0.263669
Bra015693	Bra000340	0.263666
Bra002332	Bra019634	0.263607
Bra016607	Bra003738	0.263497
Bra015693	Bra025984	0.263363
Bra019722	Bra000321	0.263266
Bra015693	Bra015656	0.26278
Bra021401	Bra016653	0.262564
Bra003738	Bra034572	0.262471
Bra015693	Bra019634	0.260798
Bra019722	Bra032555	0.259372
Bra019722	Bra039006	0.25934
Bra019672	Bra013763	0.259111
Bra025984	Bra012959	0.258401
Bra019722	Bra028896	0.257608
Bra020576	Bra013763	0.256131
Bra015693	Bra028543	0.255271
Bra028543	Bra019634	0.254989
Bra015693	Bra002822	0.254621
Bra026533	Bra039006	0.254292
Bra021401	Bra025984	0.254244
Bra002245	Bra034572	0.253993
Bra015693	Bra020576	0.253008
Bra002245	Bra032039	0.252868
Bra002245	Bra020047	0.252147
Bra037808	Bra017745	0.251749
Bra028543	Bra002822	0.251406
Bra004803	Bra013763	0.251245
Bra032039	Bra039006	0.249857
Bra012959	Bra013763	0.249795
Bra002332	Bra025984	0.248935
Bra006280	Bra013763	0.248222
Bra006280	Bra016653	0.247274
Bra002332	Bra010194	0.247232
Bra004803	Bra025984	0.24687
Bra021401	Bra016607	0.244811
Bra000321	Bra007620	0.244617
Bra021401	Bra010194	0.244055
Bra025748	Bra000321	0.24404
Bra006280	Bra010194	0.243918
Bra002942	Bra016653	0.243571
Bra028543	Bra013763	0.243089
Bra029813	Bra019634	0.243018
Bra028543	Bra025984	0.242855
Bra034572	Bra039006	0.242651
Bra032555	Bra000321	0.242631
Bra006280	Bra025984	0.242611
Bra025984	Bra000340	0.239205
Bra012959	Bra016653	0.238609
Bra019634	Bra016653	0.238325
Bra034572	Bra028896	0.238123
Bra002245	Bra003738	0.238077
Bra036857	Bra039006	0.237743
Bra025748	Bra039006	0.237206
Bra025748	Bra032555	0.237136
Bra021401	Bra013763	0.236098
Bra015693	Bra017233	0.235171
Bra004803	Bra016653	0.234764
Bra015656	Bra013763	0.232256
Bra015656	Bra025984	0.230895
Bra032555	Bra007620	0.230509
Bra002245	Bra025748	0.230406
Bra019634	Bra011387	0.229867
Bra016607	Bra002822	0.229619
Bra034572	Bra016653	0.22944
Bra025748	Bra028896	0.229233
Bra016607	Bra034572	0.229131
Bra017233	Bra002822	0.228924
Bra015693	Bra006395	0.228881
Bra031873	Bra027996	0.22837
Bra025636	Bra006280	0.228359
Bra019672	Bra016653	0.227748
Bra019639	Bra019634	0.227118
Bra015693	Bra029813	0.226864
Bra017745	Bra027996	0.22665
Bra015693	Bra016607	0.22576
Bra020519	Bra039006	0.225052
Bra028543	Bra017509	0.224975
Bra005261	Bra002245	0.22487
Bra025748	Bra007620	0.224139
Bra015252	Bra037808	0.223256
Bra006280	Bra020576	0.22302
Bra020529	Bra032039	0.222638
Bra002332	Bra029813	0.222605
Bra028543	Bra010194	0.222387
Bra037520	Bra013763	0.222117
Bra015693	Bra006280	0.221476
Bra028543	Bra019639	0.22098
Bra036857	Bra034572	0.220592
Bra036857	Bra003738	0.220456
Bra015693	Bra020529	0.219868
Bra010194	Bra003738	0.219807
Bra026533	Bra034572	0.219364
Bra015693	Bra032039	0.219183
Bra019672	Bra025984	0.219146
Bra019634	Bra013763	0.218229
Bra001958	Bra013763	0.218221
Bra019722	Bra016729	0.217055
Bra032039	Bra016653	0.217008
Bra034572	Bra000321	0.216218
Bra004803	Bra010194	0.216051
Bra016607	Bra000340	0.215073
Bra037520	Bra016653	0.214997
Bra017509	Bra019634	0.214406
Bra025984	Bra037520	0.214106
Bra026533	Bra028896	0.213894
Bra015656	Bra010194	0.213788
Bra000340	Bra013763	0.213698
Bra003738	Bra039006	0.213153
Bra020529	Bra016653	0.211433
Bra010194	Bra012959	0.211083
Bra025984	Bra019634	0.21102
Bra006395	Bra016653	0.210931
Bra002332	Bra015656	0.210789
Bra002942	Bra010194	0.210649
Bra020519	Bra020047	0.210621
Bra015656	Bra019634	0.210301
Bra019722	Bra005261	0.210222
Bra016607	Bra037520	0.210152
Bra026533	Bra036857	0.209227
Bra020519	Bra036857	0.208851
Bra019722	Bra025748	0.207981
Bra029813	Bra013763	0.207927
Bra036172	Bra016653	0.20724
Bra004803	Bra025636	0.206903
Bra025636	Bra013763	0.206778
Bra020529	Bra000340	0.206719
Bra026533	Bra003738	0.206553
Bra028543	Bra029813	0.20654
Bra028543	Bra020576	0.205719
Bra020529	Bra007620	0.205503
Bra021401	Bra017233	0.20524
Bra025636	Bra025984	0.205034
Bra001958	Bra025984	0.202023
Bra019722	Bra020047	0.201934
Bra010194	Bra019634	0.201884
Bra025636	Bra020576	0.201146
Bra020519	Bra026533	0.201024
Bra010194	Bra019672	0.200757
Bra010194	Bra020529	0.200416
Bra029813	Bra016653	0.200272
Bra025984	Bra003738	0.199224
Bra020529	Bra028896	0.19824
Bra015693	Bra004803	0.198221
Bra002332	Bra002942	0.198198
Bra017233	Bra027996	0.198087
Bra020519	Bra028896	0.197932
Bra020047	Bra039006	0.197658
Bra019672	Bra017233	0.197174
Bra003738	Bra028896	0.197123
Bra020576	Bra002822	0.196578
Bra002245	Bra000340	0.196423
Bra002942	Bra020529	0.196149
Bra025636	Bra021401	0.195298
Bra015693	Bra017509	0.195075
Bra024759	Bra027996	0.19445
Bra015656	Bra002822	0.194324
Bra037520	Bra017233	0.19389
Bra025636	Bra010194	0.193733
Bra016607	Bra019672	0.193649
Bra028543	Bra004803	0.193571
Bra012959	Bra002822	0.193459
Bra004803	Bra006280	0.193384
Bra034572	Bra007620	0.193279
Bra003738	Bra017233	0.19309
Bra017509	Bra025984	0.19309
Bra017509	Bra016653	0.192483
Bra036857	Bra028896	0.192312
Bra037808	Bra024759	0.192078
Bra036857	Bra016653	0.191305
Bra036172	Bra025984	0.1909
Bra020519	Bra034572	0.190699
Bra004803	Bra020576	0.190276
Bra031090	Bra019634	0.190111
Bra037520	Bra002822	0.189824
Bra025407	Bra017233	0.189791
Bra025407	Bra024759	0.189773
Bra020529	Bra032555	0.1889
Bra017052	Bra034572	0.18887
Bra020576	Bra016607	0.188803
Bra015693	Bra003738	0.188793
Bra004803	Bra012959	0.188761
Bra019722	Bra020529	0.18852
Bra003738	Bra000340	0.188443
Bra002942	Bra006395	0.188398
Bra002332	Bra002822	0.187542
Bra016607	Bra012959	0.187416
Bra010194	Bra034572	0.187375
Bra028543	Bra006395	0.187368
Bra017509	Bra013763	0.187166
Bra019722	Bra020519	0.18695
Bra031873	Bra017745	0.186507
Bra028543	Bra017233	0.186144
Bra016607	Bra017052	0.185818
Bra015693	Bra019639	0.18525
Bra000340	Bra017233	0.185188
Bra010194	Bra032039	0.185074
Bra015693	Bra036172	0.184944
Bra016729	Bra002245	0.184912
Bra016729	Bra032555	0.1849
Bra020576	Bra000340	0.184825
Bra001958	Bra016653	0.184769
Bra015693	Bra011387	0.184682
Bra037808	Bra017233	0.184579
Bra028543	Bra002942	0.184468
Bra027996	Bra013763	0.184239
Bra016607	Bra025407	0.183867
Bra025636	Bra016653	0.183525
Bra016729	Bra004866	0.183408
Bra028543	Bra006280	0.183188
Bra015693	Bra021401	0.183069
Bra029813	Bra011387	0.182885
Bra019722	Bra034572	0.182862
Bra019722	Bra026533	0.182731
Bra000340	Bra002822	0.182696
Bra020576	Bra021401	0.182435
Bra004803	Bra002822	0.182142
Bra021401	Bra002822	0.181006
Bra028543	Bra000340	0.180855
Bra002332	Bra020576	0.180625
Bra028543	Bra011387	0.180476
Bra029813	Bra025984	0.179905
Bra020576	Bra019634	0.179546
Bra000340	Bra032039	0.179431
Bra028896	Bra032039	0.179151
Bra002245	Bra002942	0.179046
Bra019722	Bra004866	0.178919
Bra025984	Bra027996	0.178524
Bra016607	Bra027996	0.178133
Bra016729	Bra039006	0.178122
Bra019722	Bra032039	0.177676
Bra036172	Bra010194	0.177088
Bra034572	Bra000340	0.176866
Bra019722	Bra036857	0.176745
Bra012959	Bra017233	0.176459
Bra002942	Bra019634	0.176278
Bra015693	Bra012959	0.176243
Bra028543	Bra012959	0.17621
Bra010194	Bra037520	0.176147
Bra019634	Bra002822	0.176047
Bra002942	Bra000340	0.175954
Bra006280	Bra019634	0.175724
Bra015252	Bra017745	0.175673
Bra006280	Bra002822	0.175358
Bra005261	Bra039006	0.175096
Bra017052	Bra016653	0.174713
Bra004803	Bra019634	0.174636
Bra020576	Bra017233	0.17439
Bra002332	Bra006395	0.174075
Bra020519	Bra003738	0.173574
Bra028543	Bra016607	0.173435
Bra010194	Bra029813	0.173245
Bra019634	Bra021404	0.173104
Bra019639	Bra011387	0.172411
Bra019639	Bra029813	0.172192
Bra010194	Bra036857	0.171063
Bra020529	Bra034572	0.170955
Bra016607	Bra036857	0.17044
Bra020576	Bra012959	0.17043
Bra003738	Bra013763	0.170411
Bra025407	Bra025984	0.170194
Bra019639	Bra002332	0.170105
Bra017052	Bra003738	0.169905
Bra015252	Bra027996	0.169775
Bra020529	Bra000321	0.169355
Bra010194	Bra017509	0.169353
Bra010194	Bra006395	0.169182
Bra016729	Bra007620	0.169084
Bra002942	Bra032039	0.169032
Bra000340	Bra039006	0.168983
Bra019639	Bra017509	0.168648
Bra010669	Bra037808	0.167751
Bra025407	Bra031873	0.167577
Bra019722	Bra003738	0.167302
Bra020047	Bra028896	0.167276
Bra036172	Bra013763	0.167055
Bra026533	Bra020529	0.167023
Bra002942	Bra025984	0.167008
Bra002942	Bra013763	0.166976
Bra002942	Bra039006	0.166814
Bra036857	Bra000340	0.166804
Bra025748	Bra020529	0.166491
Bra020529	Bra036857	0.166398
Bra028543	Bra036172	0.166384
Bra034572	Bra032555	0.166331
Bra006280	Bra016607	0.166114
Bra000884	Bra016653	0.165893
Bra021401	Bra000340	0.165867
Bra015693	Bra019672	0.165787
Bra019639	Bra031090	0.165192
Bra003738	Bra007620	0.165098
Bra005261	Bra020047	0.164017
Bra015656	Bra006395	0.163799
Bra029813	Bra021404	0.163783
Bra026533	Bra016653	0.16378
Bra034572	Bra032039	0.163741
Bra016607	Bra037808	0.163724
Bra002245	Bra022774	0.163712
Bra003738	Bra032039	0.163522
Bra004803	Bra016607	0.163433
Bra002332	Bra006280	0.163299
Bra025407	Bra013763	0.16314
Bra006395	Bra019634	0.162682
Bra020529	Bra003738	0.162641
Bra025984	Bra034572	0.162611
Bra026533	Bra007620	0.162131
Bra003738	Bra000321	0.161897
Bra026533	Bra020047	0.161871
Bra019639	Bra016653	0.161849
Bra005261	Bra007620	0.161846
Bra016729	Bra000321	0.16144
Bra002245	Bra016653	0.160895
Bra025407	Bra017745	0.16019
Bra006280	Bra021401	0.160116
Bra000884	Bra015693	0.160043
Bra017509	Bra002822	0.160042
Bra016729	Bra025748	0.159673
Bra026533	Bra000340	0.159536
Bra020576	Bra019672	0.158787
Bra004803	Bra021401	0.158574
Bra002942	Bra015656	0.158505
Bra021401	Bra012959	0.15844
Bra015693	Bra034572	0.157915
Bra034572	Bra017233	0.157906
Bra002332	Bra016607	0.157879
Bra004803	Bra017233	0.157877
Bra001958	Bra004803	0.157224
Bra025748	Bra034572	0.156965
Bra021401	Bra021432	0.156942
Bra001958	Bra017233	0.156918
Bra031090	Bra011387	0.156829
Bra001958	Bra010194	0.156641
Bra022698	Bra027996	0.156521
Bra002332	Bra011387	0.156425
Bra016653	Bra027996	0.15635
Bra032555	Bra032039	0.156288
Bra032039	Bra007620	0.156019
Bra019639	Bra013763	0.155052
Bra004866	Bra039006	0.155021
Bra025636	Bra016607	0.154593
Bra028543	Bra000211	0.154536
Bra019672	Bra002822	0.154412
Bra004803	Bra019672	0.153936
Bra021401	Bra003738	0.153385
Bra019639	Bra025984	0.153197
Bra019639	Bra015656	0.15319
Bra006280	Bra017233	0.152953
Bra006280	Bra012959	0.152949
Bra025748	Bra032039	0.152672
Bra015693	Bra036857	0.152571
Bra000884	Bra010194	0.152318
Bra005261	Bra028896	0.152316
Bra010194	Bra026533	0.151962
Bra002332	Bra000340	0.15192
Bra025748	Bra004866	0.151909
Bra025984	Bra006395	0.151892
Bra036857	Bra020047	0.151647
Bra001958	Bra016607	0.151556
Bra002245	Bra006395	0.151187
Bra015656	Bra016607	0.151091
Bra011387	Bra013763	0.15106
Bra002332	Bra017233	0.150829
Bra020576	Bra029813	0.150751
Bra026023	Bra021401	0.15036
Bra006280	Bra000340	0.150313
Bra006280	Bra029813	0.150083
Bra025407	Bra016653	0.150053
Bra006395	Bra013763	0.149787
Bra002332	Bra004803	0.149782
Bra000884	Bra020576	0.149682
Bra011387	Bra016653	0.149669
Bra015693	Bra002245	0.149567
Bra037808	Bra013763	0.149224
Bra031090	Bra021404	0.149173
Bra020047	Bra007620	0.149171
Bra028543	Bra031090	0.14854
Bra036857	Bra007620	0.14835
Bra031090	Bra029813	0.147998
Bra019639	Bra021404	0.147933
Bra000884	Bra025984	0.147812
Bra004803	Bra017509	0.147576
Bra025984	Bra017052	0.147223
Bra002245	Bra010194	0.147102
Bra025636	Bra012959	0.146995
Bra010669	Bra017745	0.146944
Bra022698	Bra013763	0.14693
Bra039006	Bra016653	0.146476
Bra016607	Bra026533	0.146181
Bra002245	Bra004866	0.146137
Bra005261	Bra020519	0.146103
Bra016607	Bra021432	0.146036
Bra020576	Bra015656	0.145849
Bra002332	Bra017509	0.145513
Bra015656	Bra029813	0.145435
Bra037808	Bra025984	0.145393
Bra025984	Bra011387	0.145363
Bra016729	Bra005261	0.145047
Bra022839	Bra019634	0.144997
Bra003738	Bra002822	0.144483
Bra000884	Bra013763	0.144329
Bra008066	Bra037520	0.144265
Bra021401	Bra019672	0.144214
Bra002245	Bra016607	0.14383
Bra010194	Bra011387	0.143736
Bra025984	Bra032039	0.143572
Bra015693	Bra025636	0.143473
Bra025748	Bra026533	0.143446
Bra029813	Bra017509	0.142387
Bra036172	Bra002822	0.142216
Bra002332	Bra019672	0.142009
Bra025636	Bra017233	0.141977
Bra025748	Bra020047	0.141565
Bra016729	Bra028896	0.141525
Bra028896	Bra000340	0.141215
Bra015656	Bra000340	0.140884
Bra006280	Bra019672	0.140465
Bra028543	Bra021401	0.14028
Bra020576	Bra017509	0.140263
Bra020047	Bra000321	0.140119
Bra001958	Bra002822	0.139664
Bra004803	Bra029813	0.138679
Bra020047	Bra034572	0.138539
Bra020576	Bra011387	0.138472
Bra001958	Bra015693	0.138464
Bra010194	Bra017052	0.138314
Bra028543	Bra032039	0.138088
Bra020519	Bra007620	0.137451
Bra036172	Bra020576	0.137059
Bra019634	Bra012959	0.136572
Bra006395	Bra032039	0.136494
Bra019634	Bra000340	0.136433
Bra026023	Bra016607	0.136278
Bra025636	Bra002822	0.136115
Bra036857	Bra032039	0.136044
Bra005261	Bra000321	0.135983
Bra015693	Bra039006	0.135547
Bra020529	Bra006395	0.135471
Bra002245	Bra017052	0.135149
Bra005261	Bra025748	0.135045
Bra025748	Bra003738	0.134997
Bra025984	Bra020529	0.134987
Bra011387	Bra021404	0.134963
Bra005261	Bra036857	0.134942
Bra021433	Bra029813	0.134814
Bra016607	Bra032039	0.134257
Bra020576	Bra002942	0.133653
Bra005261	Bra026533	0.133495
Bra005261	Bra032555	0.133233
Bra003738	Bra032555	0.133187
Bra036172	Bra000340	0.132996
Bra022839	Bra031090	0.132985
Bra001958	Bra027996	0.132833
Bra015693	Bra026533	0.132764
Bra029813	Bra002822	0.132749
Bra021401	Bra034572	0.132575
Bra025748	Bra036857	0.132328
Bra006395	Bra000340	0.132084
Bra015656	Bra017233	0.132034
Bra028543	Bra019672	0.132009
Bra017509	Bra011387	0.131767
Bra020519	Bra025748	0.13176
Bra008066	Bra025407	0.131745
Bra036172	Bra019634	0.131695
Bra015693	Bra031090	0.131608
Bra037808	Bra019791	0.131356
Bra008267	Bra013763	0.131051
Bra036172	Bra016607	0.130966
Bra022698	Bra025984	0.13094
Bra019634	Bra017233	0.130935
Bra020519	Bra020529	0.13073
Bra019639	Bra010194	0.130604
Bra000340	Bra007620	0.130171
Bra004803	Bra022698	0.130143
Bra015693	Bra037520	0.130051
Bra017233	Bra021432	0.129972
Bra000321	Bra032039	0.129968
Bra010194	Bra027996	0.129894
Bra005261	Bra034572	0.12984
Bra034572	Bra013763	0.129461
Bra021401	Bra037520	0.129357
Bra002942	Bra029813	0.128742
Bra001958	Bra021401	0.1287
Bra001958	Bra028543	0.128646
Bra016607	Bra020529	0.128324
Bra028543	Bra037520	0.12811
Bra019639	Bra002822	0.128098
Bra026533	Bra032039	0.128089
Bra028896	Bra016653	0.12808
Bra015656	Bra017509	0.127768
Bra005261	Bra003738	0.127717
Bra022839	Bra029813	0.127504
Bra039006	Bra022774	0.127443
Bra010194	Bra039006	0.127433
Bra022698	Bra037808	0.126835
Bra026023	Bra021432	0.125745
Bra004803	Bra011387	0.125738
Bra026533	Bra000321	0.125675
Bra037808	Bra016653	0.125674
Bra022839	Bra019639	0.125452
Bra004803	Bra000340	0.125409
Bra000340	Bra012959	0.125284
Bra031090	Bra002332	0.125273
Bra025984	Bra036857	0.124893
Bra001958	Bra012959	0.124658
Bra005261	Bra020529	0.124318
Bra022839	Bra021404	0.123999
Bra008066	Bra037808	0.123926
Bra000884	Bra028543	0.123871
Bra004866	Bra007620	0.123839
Bra020529	Bra020047	0.123821
Bra006280	Bra011387	0.12365
Bra028543	Bra020529	0.123631
Bra019722	Bra022774	0.123182
Bra004866	Bra032555	0.123142
Bra021401	Bra027996	0.123087
Bra027996	Bra002822	0.123013
Bra021432	Bra013763	0.122999
Bra017052	Bra002822	0.122901
Bra021401	Bra025407	0.122795
Bra028543	Bra003738	0.122637
Bra020047	Bra003738	0.122461
Bra002332	Bra012959	0.122425
Bra025984	Bra021432	0.122414
Bra025636	Bra021432	0.122405
Bra025984	Bra008874	0.122327
Bra019672	Bra008267	0.121909
Bra032039	Bra013763	0.121894
Bra010194	Bra025407	0.121886
Bra020047	Bra032555	0.121675
Bra002942	Bra002822	0.121652
Bra025407	Bra002822	0.121338
Bra002942	Bra016607	0.120963
Bra019639	Bra004803	0.120863
Bra019722	Bra002942	0.120838
Bra025407	Bra019791	0.120622
Bra022698	Bra017233	0.12057
Bra017052	Bra000340	0.12052
Bra001958	Bra020576	0.120504
Bra006395	Bra002822	0.120222
Bra006280	Bra017509	0.120072
Bra008066	Bra027996	0.120041
Bra005261	Bra032039	0.119843
Bra002332	Bra036172	0.119506
Bra020519	Bra016653	0.119224
Bra034572	Bra002822	0.119199
Bra000211	Bra019634	0.118532
Bra016653	Bra008267	0.11853
Bra036172	Bra015656	0.118457
Bra017052	Bra017233	0.118337
Bra006395	Bra039006	0.117517
Bra029813	Bra019672	0.117504
Bra021401	Bra022698	0.117442
Bra019791	Bra027996	0.117388
Bra001958	Bra022698	0.117376
Bra002942	Bra003738	0.11737
Bra016653	Bra008874	0.117315
Bra013476	Bra014297	0.117096
Bra020576	Bra037520	0.117024
Bra028543	Bra025636	0.116626
Bra016607	Bra019634	0.116495
Bra017052	Bra013763	0.116415
Bra016653	Bra021432	0.116364
Bra017052	Bra000825	0.116279
Bra034572	Bra000825	0.116268
Bra010669	Bra027996	0.11621
Bra020519	Bra000321	0.116159
Bra004803	Bra015656	0.115838
Bra002332	Bra032039	0.115735
Bra002332	Bra021404	0.115693
Bra006280	Bra015656	0.115154
Bra028543	Bra021404	0.114989
Bra000884	Bra004803	0.114868
Bra031090	Bra017509	0.114734
Bra019722	Bra000340	0.114618
Bra019722	Bra031485	0.114604
Bra000884	Bra002332	0.114542
Bra004866	Bra028896	0.11446
Bra019722	Bra006395	0.11446
Bra037520	Bra027996	0.114005
Bra016607	Bra028896	0.113848
Bra002942	Bra032555	0.113776
Bra005261	Bra016653	0.113732
Bra016729	Bra031485	0.113537
Bra004803	Bra027996	0.113535
Bra001958	Bra019634	0.113349
Bra015656	Bra032039	0.113308
Bra020519	Bra000340	0.112929
Bra021433	Bra031042	0.112627
Bra017052	Bra028896	0.112569
Bra000884	Bra019634	0.112564
Bra020529	Bra013763	0.112394
Bra020576	Bra003738	0.112346
Bra016607	Bra039006	0.112319
Bra016607	Bra008874	0.112193
Bra002822	Bra008874	0.111959
Bra020047	Bra032039	0.111776
Bra019634	Bra032039	0.111738
Bra016607	Bra000825	0.111724
Bra019672	Bra000340	0.111688
Bra000884	Bra006280	0.111471
Bra022839	Bra011387	0.111468
Bra013763	Bra008874	0.111375
Bra025636	Bra000340	0.111252
Bra019672	Bra019634	0.111244
Bra016653	Bra007620	0.111169
Bra002245	Bra015656	0.11102
Bra015693	Bra000211	0.110687
Bra025636	Bra019634	0.110462
Bra017052	Bra039006	0.110404
Bra034572	Bra041019	0.110213
Bra029813	Bra006395	0.11015
Bra019639	Bra000211	0.109943
Bra001958	Bra006280	0.109515
Bra015252	Bra025407	0.109498
Bra028896	Bra022774	0.10946
Bra001958	Bra002332	0.109448
Bra025636	Bra022698	0.109181
Bra012959	Bra027996	0.109144
Bra019639	Bra020576	0.108579
Bra010194	Bra028896	0.108472
Bra003738	Bra037520	0.10845
Bra000211	Bra016653	0.108427
Bra011387	Bra002822	0.108251
Bra015693	Bra017052	0.108215
Bra015656	Bra012959	0.108192
Bra026023	Bra017233	0.108129
Bra019722	Bra016653	0.107967
Bra015693	Bra021404	0.107767
Bra004803	Bra037520	0.107647
Bra010194	Bra021432	0.107537
Bra020576	Bra006395	0.107462
Bra020519	Bra032039	0.107137
Bra000884	Bra000340	0.107057
Bra036172	Bra032039	0.107054
Bra016607	Bra022698	0.107013
Bra025636	Bra019672	0.106901
Bra021432	Bra027996	0.106843
Bra002245	Bra025984	0.10674
Bra016729	Bra020047	0.106705
Bra020519	Bra016607	0.106692
Bra020576	Bra020529	0.106619
Bra000884	Bra016607	0.10656
Bra031042	Bra029813	0.106529
Bra019639	Bra006395	0.10616
Bra002332	Bra020529	0.106139
Bra036857	Bra000321	0.106066
Bra015693	Bra028896	0.105678
Bra019672	Bra012959	0.105643
Bra036857	Bra017233	0.105427
Bra020047	Bra022774	0.105404
Bra002942	Bra028896	0.105364
Bra015693	Bra007620	0.105295
Bra019639	Bra006280	0.105141
Bra002942	Bra007620	0.105089
Bra022698	Bra016653	0.105069
Bra002942	Bra034572	0.104971
Bra021401	Bra037808	0.104897
Bra036172	Bra017233	0.104872
Bra032039	Bra002822	0.104788
Bra017509	Bra012959	0.104239
Bra000340	Bra032555	0.104151
Bra025748	Bra022774	0.104075
Bra002245	Bra017233	0.103975
Bra025407	Bra037520	0.103896
Bra037520	Bra000340	0.103882
Bra022698	Bra025407	0.103841
Bra026023	Bra025984	0.103554
Bra002332	Bra021401	0.103446
Bra020519	Bra010194	0.103428
Bra024759	Bra017233	0.103225
Bra026533	Bra025984	0.10307
Bra004803	Bra036172	0.103039
Bra025748	Bra000340	0.102999
Bra016607	Bra006395	0.102998
Bra000211	Bra025984	0.102693
Bra025984	Bra024759	0.102539
Bra002245	Bra002822	0.102503
Bra027569	Bra034572	0.102418
Bra021401	Bra019634	0.102159
Bra000340	Bra000321	0.102142
Bra015656	Bra003738	0.102069
Bra016607	Bra017509	0.101966
Bra020576	Bra032039	0.101859
Bra026023	Bra016653	0.101774
Bra001958	Bra037808	0.101656
Bra005261	Bra004866	0.101601
Bra002332	Bra008267	0.101562
Bra025407	Bra012959	0.10142
Bra020529	Bra019634	0.101247
Bra016729	Bra020529	0.101117
Bra017509	Bra000340	0.100885
Bra010194	Bra037808	0.100762
Bra000211	Bra002822	0.100682
Bra000884	Bra002822	0.100667
Bra020529	Bra004866	0.10043
Bra029813	Bra012959	0.100376
Bra025636	Bra029813	0.100346
Bra015656	Bra011387	0.100044

## Sheet: grey
fromNode	toNode	weight
Bra027696	Bra027737	0.475554
Bra009386	Bra009385	0.456478
Bra009388	Bra028631	0.421217
Bra023110	Bra026835	0.358434
Bra035913	Bra019613	0.338764
Bra015047	Bra026835	0.326731
Bra035913	Bra010324	0.319999
Bra011994	Bra040274	0.305656
Bra038516	Bra033751	0.303715
Bra004455	Bra012696	0.293399
Bra030230	Bra009388	0.290607
Bra041032	Bra026835	0.282244
Bra038516	Bra030230	0.276383
Bra036999	Bra009388	0.275979
Bra029582	Bra040274	0.274495
Bra038516	Bra009388	0.270483
Bra030230	Bra033751	0.269142
Bra019613	Bra010324	0.264265
Bra015047	Bra023110	0.257534
Bra022819	Bra035913	0.251946
Bra030230	Bra028631	0.249174
Bra036999	Bra030230	0.245597
Bra011994	Bra029582	0.238156
Bra035913	Bra041032	0.237783
Bra035913	Bra029308	0.237377
Bra022819	Bra029308	0.237356
Bra041032	Bra023110	0.236133
Bra038516	Bra028631	0.23133
Bra009388	Bra033751	0.228235
Bra035913	Bra026835	0.217751
Bra035913	Bra023110	0.214086
Bra035913	Bra015047	0.211301
Bra038516	Bra036999	0.207964
Bra036986	Bra036988	0.206434
Bra002214	Bra017011	0.199862
Bra022819	Bra023110	0.197033
Bra029308	Bra041032	0.195043
Bra008920	Bra024533	0.194228
Bra022819	Bra007687	0.193173
Bra036999	Bra028631	0.191418
Bra009548	Bra026835	0.187713
Bra004455	Bra015375	0.186527
Bra040159	Bra012131	0.186433
Bra019613	Bra041032	0.186134
Bra015047	Bra041032	0.182888
Bra035913	Bra007687	0.180424
Bra022819	Bra026835	0.18026
Bra022719	Bra028269	0.178355
Bra007687	Bra029308	0.176227
Bra022819	Bra015047	0.174892
Bra012696	Bra010324	0.174859
Bra035183	Bra020159	0.172985
Bra022819	Bra041032	0.171979
Bra019613	Bra029308	0.170652
Bra028631	Bra033751	0.170454
Bra004455	Bra010324	0.169516
Bra022819	Bra019613	0.169358
Bra002322	Bra024569	0.165219
Bra016252	Bra027357	0.165007
Bra009826	Bra019121	0.164936
Bra039943	Bra005612	0.162048
Bra013091	Bra017011	0.158511
Bra029308	Bra023110	0.158235
Bra018157	Bra017031	0.157711
Bra029308	Bra026835	0.155899
Bra016007	Bra033549	0.155111
Bra019613	Bra026835	0.154756
Bra024533	Bra021157	0.153593
Bra036999	Bra033751	0.151925
Bra015047	Bra009548	0.151679
Bra026542	Bra007442	0.151613
Bra014987	Bra012557	0.150995
Bra002583	Bra009200	0.149041
Bra022819	Bra010324	0.148969
Bra023110	Bra009548	0.148369
Bra013229	Bra013374	0.148255
Bra024068	Bra012006	0.14571
Bra007335	Bra014417	0.145463
Bra004449	Bra009514	0.14225
Bra019366	Bra016252	0.142164
Bra026542	Bra034091	0.14061
Bra015047	Bra019613	0.140446
Bra012696	Bra015375	0.140003
Bra019613	Bra023110	0.138916
Bra011201	Bra017872	0.137833
Bra029308	Bra010324	0.137126
Bra034941	Bra024634	0.135679
Bra027957	Bra005250	0.135379
Bra041032	Bra010324	0.133151
Bra041032	Bra009548	0.132851
Bra016007	Bra040107	0.131707
Bra007687	Bra010324	0.129427
Bra035913	Bra012696	0.128438
Bra033181	Bra000710	0.124786
Bra015890	Bra020077	0.124599
Bra020295	Bra006697	0.124059
Bra021527	Bra008052	0.123785
Bra027198	Bra034838	0.123775
Bra015047	Bra029308	0.123711
Bra016007	Bra017120	0.120352
Bra035913	Bra004455	0.119036
Bra015047	Bra010324	0.118987
Bra008089	Bra038726	0.118157
Bra034853	Bra027430	0.117305
Bra006137	Bra021157	0.117164
Bra034717	Bra026843	0.116691
Bra039943	Bra032055	0.115642
Bra024879	Bra005053	0.113571
Bra006137	Bra024533	0.112246
Bra006523	Bra023280	0.11193
Bra019613	Bra007687	0.111782
Bra014987	Bra028670	0.111649
Bra028269	Bra031915	0.110588
Bra032038	Bra029308	0.110564
Bra019613	Bra012696	0.10989
Bra010324	Bra026835	0.109488
Bra004261	Bra002272	0.109178
Bra034838	Bra040819	0.108794
Bra019464	Bra024569	0.108753
Bra033290	Bra014875	0.108229
Bra039818	Bra013120	0.108129
Bra024600	Bra017157	0.107364
Bra028269	Bra006293	0.107217
Bra012056	Bra019464	0.107038
Bra012651	Bra040173	0.107028
Bra018157	Bra013399	0.106048
Bra002271	Bra015483	0.105558
Bra021594	Bra016732	0.105361
Bra004455	Bra019613	0.10509
Bra008920	Bra021157	0.10418
Bra016007	Bra027049	0.104116
Bra000742	Bra004092	0.104018
Bra020255	Bra021914	0.102589
Bra012362	Bra031803	0.102578
Bra001037	Bra013399	0.102241
Bra019332	Bra002454	0.102171
Bra002269	Bra028463	0.101714
Bra023110	Bra010324	0.101705
Bra038516	Bra019245	0.101121
Bra008089	Bra026846	0.100717
Bra023940	Bra027206	0.100007

## Sheet: magenta
fromNode	toNode	weight
Bra018611	Bra004759	0.342999
Bra004759	Bra026784	0.332883
Bra004759	Bra026167	0.315505
Bra035179	Bra004759	0.307965
Bra004759	Bra020094	0.304746
Bra006722	Bra032557	0.299284
Bra018463	Bra004759	0.298281
Bra035179	Bra020094	0.297585
Bra006722	Bra028911	0.297469
Bra017184	Bra004759	0.297288
Bra006722	Bra018463	0.293167
Bra006722	Bra031636	0.290732
Bra004759	Bra001220	0.290387
Bra004759	Bra017912	0.289561
Bra035179	Bra026167	0.288512
Bra004759	Bra039808	0.286686
Bra004227	Bra004759	0.285181
Bra006722	Bra038291	0.285084
Bra006722	Bra001220	0.282534
Bra004759	Bra032415	0.28248
Bra038291	Bra022686	0.281084
Bra038291	Bra010743	0.279802
Bra017912	Bra026784	0.27887
Bra038291	Bra032557	0.278824
Bra006722	Bra017184	0.27733
Bra038291	Bra028911	0.274771
Bra035179	Bra018611	0.274451
Bra006722	Bra022686	0.273247
Bra006722	Bra005231	0.272133
Bra035179	Bra004227	0.271407
Bra018611	Bra017912	0.271259
Bra004759	Bra018160	0.270524
Bra035179	Bra018160	0.269889
Bra018611	Bra001220	0.26936
Bra006722	Bra018611	0.269102
Bra028697	Bra038291	0.268692
Bra030906	Bra004759	0.26787
Bra006722	Bra002286	0.267599
Bra017184	Bra001220	0.266177
Bra002286	Bra038291	0.266111
Bra006722	Bra010743	0.265992
Bra018463	Bra001220	0.263971
Bra035179	Bra026784	0.263275
Bra006722	Bra004759	0.261625
Bra035179	Bra001220	0.261146
Bra002286	Bra004759	0.260335
Bra006722	Bra031392	0.259652
Bra006722	Bra031031	0.25945
Bra035179	Bra002286	0.257026
Bra038291	Bra006641	0.256945
Bra002286	Bra001220	0.256599
Bra035179	Bra017184	0.256291
Bra038291	Bra031392	0.255463
Bra017912	Bra039808	0.254675
Bra006722	Bra033882	0.254251
Bra006722	Bra035461	0.253799
Bra038291	Bra031636	0.253738
Bra006722	Bra021537	0.253532
Bra006722	Bra006641	0.253457
Bra010744	Bra038291	0.253275
Bra017184	Bra038291	0.2531
Bra006722	Bra003998	0.250807
Bra035179	Bra017912	0.250427
Bra006722	Bra035179	0.249655
Bra038291	Bra005987	0.249437
Bra035179	Bra028697	0.248083
Bra028697	Bra004759	0.247515
Bra021537	Bra004759	0.247499
Bra026167	Bra001220	0.24742
Bra038291	Bra001220	0.247262
Bra006722	Bra028697	0.247072
Bra006722	Bra032415	0.246898
Bra018611	Bra026784	0.246619
Bra020094	Bra001220	0.24599
Bra035179	Bra018463	0.245912
Bra004759	Bra031031	0.245888
Bra030906	Bra026784	0.244972
Bra001220	Bra022686	0.243846
Bra037207	Bra038291	0.243784
Bra030906	Bra017912	0.243709
Bra001220	Bra026784	0.243491
Bra028697	Bra001220	0.243378
Bra001220	Bra017912	0.243256
Bra026167	Bra017912	0.242967
Bra006722	Bra037207	0.242954
Bra031636	Bra001220	0.242728
Bra021537	Bra001220	0.241973
Bra006722	Bra009217	0.241613
Bra018611	Bra030906	0.241122
Bra006722	Bra010035	0.240955
Bra038291	Bra018463	0.240253
Bra021537	Bra038291	0.240171
Bra006879	Bra032557	0.239797
Bra032557	Bra028911	0.239427
Bra035179	Bra021537	0.23928
Bra004759	Bra031636	0.239028
Bra001220	Bra028911	0.238976
Bra018463	Bra017912	0.238933
Bra004227	Bra001220	0.237738
Bra001220	Bra032557	0.237506
Bra004227	Bra017912	0.236591
Bra006722	Bra019963	0.236495
Bra038291	Bra033882	0.235507
Bra001220	Bra032415	0.23539
Bra006879	Bra001220	0.235169
Bra035179	Bra039808	0.235072
Bra006722	Bra006879	0.234943
Bra006722	Bra017912	0.234659
Bra038291	Bra005231	0.233965
Bra006879	Bra018463	0.233893
Bra004759	Bra012479	0.233336
Bra018463	Bra031031	0.233176
Bra006722	Bra026167	0.233098
Bra038291	Bra004759	0.232676
Bra006879	Bra038291	0.232332
Bra006722	Bra026784	0.231968
Bra001220	Bra039808	0.231367
Bra028697	Bra002286	0.231001
Bra032415	Bra017912	0.230357
Bra006879	Bra031636	0.229976
Bra035179	Bra032415	0.228959
Bra006722	Bra020094	0.227424
Bra004759	Bra022686	0.227122
Bra026167	Bra026784	0.227086
Bra032557	Bra010743	0.226925
Bra006722	Bra005987	0.226608
Bra030906	Bra018463	0.225557
Bra020094	Bra017912	0.225543
Bra004759	Bra012239	0.225458
Bra006879	Bra022686	0.225253
Bra006879	Bra021537	0.22494
Bra031392	Bra028911	0.224329
Bra028911	Bra010743	0.224256
Bra031031	Bra001220	0.224229
Bra032557	Bra022686	0.2233
Bra031392	Bra010743	0.223294
Bra020094	Bra026784	0.222729
Bra035179	Bra030906	0.221888
Bra006722	Bra030906	0.221121
Bra001220	Bra010743	0.220719
Bra020094	Bra018160	0.220524
Bra018611	Bra031031	0.219987
Bra017184	Bra017912	0.21953
Bra006879	Bra031031	0.219472
Bra037207	Bra010743	0.218724
Bra006641	Bra001220	0.218562
Bra006879	Bra002286	0.21762
Bra006879	Bra006641	0.217406
Bra030906	Bra026167	0.217367
Bra004759	Bra028911	0.217366
Bra006879	Bra028911	0.217239
Bra006722	Bra030505	0.216691
Bra017184	Bra018611	0.216166
Bra030906	Bra001220	0.216092
Bra022692	Bra017912	0.216027
Bra031392	Bra032557	0.215977
Bra020094	Bra026167	0.215744
Bra004759	Bra032557	0.215684
Bra006722	Bra012239	0.215569
Bra006879	Bra009217	0.215416
Bra035179	Bra022686	0.215114
Bra006641	Bra010743	0.215036
Bra006879	Bra004759	0.214974
Bra006879	Bra037207	0.214582
Bra006879	Bra019963	0.214541
Bra005231	Bra001220	0.214483
Bra004759	Bra000659	0.214331
Bra006722	Bra039808	0.214006
Bra004759	Bra022692	0.213947
Bra005987	Bra001220	0.213038
Bra017184	Bra031031	0.21289
Bra002286	Bra020094	0.212527
Bra035179	Bra006879	0.21221
Bra031636	Bra032557	0.212137
Bra006722	Bra023190	0.212014
Bra017184	Bra006879	0.211661
Bra019963	Bra032557	0.211423
Bra018463	Bra018160	0.210935
Bra031031	Bra017912	0.210679
Bra030906	Bra022692	0.210651
Bra001220	Bra018160	0.210601
Bra006722	Bra004227	0.210463
Bra031031	Bra032557	0.210387
Bra032557	Bra033882	0.210346
Bra030906	Bra032415	0.209872
Bra037207	Bra006641	0.209602
Bra038291	Bra019963	0.209429
Bra006879	Bra035461	0.2092
Bra006722	Bra000659	0.208918
Bra037207	Bra001220	0.208678
Bra031636	Bra031031	0.208347
Bra006879	Bra003998	0.208093
Bra031392	Bra001220	0.207814
Bra030906	Bra039808	0.207803
Bra018611	Bra038291	0.207592
Bra030906	Bra012239	0.207461
Bra006879	Bra010743	0.207402
Bra035179	Bra038291	0.207014
Bra001009	Bra038291	0.206888
Bra018611	Bra006879	0.206836
Bra018611	Bra018463	0.206386
Bra006879	Bra033882	0.206372
Bra006641	Bra032557	0.206297
Bra035461	Bra028911	0.206166
Bra018611	Bra032415	0.205967
Bra037207	Bra022686	0.20595
Bra006879	Bra001009	0.205579
Bra006879	Bra012239	0.205325
Bra018611	Bra026167	0.205224
Bra038291	Bra003998	0.205022
Bra006722	Bra001009	0.204667
Bra002286	Bra032557	0.204323
Bra004227	Bra030906	0.203794
Bra006879	Bra032415	0.203751
Bra030906	Bra020094	0.20372
Bra038291	Bra031031	0.203709
Bra022692	Bra001220	0.203612
Bra017184	Bra018463	0.203446
Bra031031	Bra028911	0.203417
Bra031636	Bra010743	0.203337
Bra005231	Bra032557	0.20331
Bra010744	Bra010743	0.203075
Bra010035	Bra035461	0.203008
Bra022692	Bra026784	0.202764
Bra006722	Bra018160	0.202655
Bra038291	Bra020094	0.202598
Bra004759	Bra005231	0.202585
Bra006879	Bra010035	0.202383
Bra003998	Bra035461	0.202136
Bra031031	Bra032415	0.201989
Bra018611	Bra020094	0.201857
Bra026784	Bra018160	0.201471
Bra001009	Bra001220	0.200448
Bra026167	Bra018160	0.200146
Bra018463	Bra032557	0.200057
Bra037207	Bra010744	0.199795
Bra006879	Bra017912	0.199308
Bra002286	Bra022686	0.199277
Bra006722	Bra022692	0.198793
Bra017912	Bra012479	0.198618
Bra005231	Bra028911	0.198604
Bra035179	Bra031031	0.198583
Bra018463	Bra020094	0.198581
Bra038291	Bra035461	0.198506
Bra030906	Bra031031	0.198405
Bra031636	Bra028911	0.198213
Bra018611	Bra022692	0.198175
Bra010035	Bra003998	0.198101
Bra012239	Bra001220	0.198048
Bra038291	Bra009217	0.19801
Bra031031	Bra026784	0.197926
Bra028697	Bra032557	0.19789
Bra001220	Bra009217	0.197794
Bra022686	Bra010743	0.197582
Bra017184	Bra026784	0.197459
Bra032415	Bra026784	0.197258
Bra028697	Bra022686	0.196843
Bra033882	Bra010743	0.196639
Bra018463	Bra022692	0.196205
Bra037207	Bra032557	0.196181
Bra006195	Bra004759	0.196048
Bra035461	Bra032557	0.196026
Bra017184	Bra030906	0.195904
Bra005231	Bra031031	0.195638
Bra002286	Bra018160	0.195338
Bra002286	Bra031031	0.195237
Bra001220	Bra033882	0.195193
Bra005987	Bra010743	0.195094
Bra010035	Bra038291	0.194938
Bra037207	Bra028911	0.194901
Bra006879	Bra030906	0.194494
Bra017912	Bra018160	0.194473
Bra021537	Bra002286	0.193792
Bra002286	Bra018463	0.193753
Bra035179	Bra022692	0.193747
Bra012239	Bra017912	0.19366
Bra038291	Bra032415	0.192876
Bra022692	Bra032415	0.192688
Bra005987	Bra004759	0.192583
Bra006879	Bra004227	0.19249
Bra002286	Bra017912	0.191809
Bra017184	Bra002286	0.191738
Bra006722	Bra010744	0.191539
Bra035179	Bra005987	0.191311
Bra038291	Bra023548	0.191206
Bra006879	Bra026167	0.191083
Bra031031	Bra022692	0.190812
Bra031031	Bra022686	0.190811
Bra030906	Bra018160	0.190766
Bra005175	Bra010743	0.190472
Bra038291	Bra007417	0.190367
Bra037207	Bra031636	0.19032
Bra037207	Bra005987	0.190079
Bra006879	Bra005231	0.190039
Bra035179	Bra031636	0.189854
Bra006879	Bra023190	0.189602
Bra021537	Bra017912	0.189591
Bra017184	Bra032557	0.18954
Bra017184	Bra032415	0.18931
Bra031031	Bra026167	0.189039
Bra035179	Bra012239	0.188839
Bra001220	Bra000659	0.18856
Bra031636	Bra033882	0.188554
Bra031636	Bra035461	0.188538
Bra003998	Bra032557	0.188537
Bra006879	Bra000659	0.188498
Bra018463	Bra026167	0.188264
Bra004227	Bra026784	0.187901
Bra031636	Bra017912	0.187851
Bra026784	Bra039808	0.187424
Bra006879	Bra030505	0.187413
Bra006641	Bra028911	0.187265
Bra010744	Bra032557	0.187224
Bra006641	Bra035461	0.187158
Bra035461	Bra010743	0.187078
Bra018463	Bra026784	0.186981
Bra012239	Bra031031	0.186979
Bra035461	Bra001220	0.186748
Bra021537	Bra031031	0.186728
Bra028697	Bra018463	0.186714
Bra035461	Bra033882	0.186623
Bra028697	Bra010743	0.186585
Bra038291	Bra026167	0.186557
Bra004009	Bra028911	0.186059
Bra030906	Bra000659	0.185976
Bra004759	Bra010743	0.185564
Bra002286	Bra026167	0.185493
Bra010744	Bra022686	0.185256
Bra002286	Bra010744	0.1851
Bra001009	Bra004759	0.184985
Bra037207	Bra033882	0.184895
Bra006879	Bra005987	0.184852
Bra006879	Bra022692	0.184804
Bra006722	Bra034599	0.184682
Bra012239	Bra022692	0.184341
Bra021537	Bra032557	0.184196
Bra019963	Bra001220	0.184193
Bra003998	Bra031636	0.184106
Bra037207	Bra004759	0.183959
Bra004759	Bra031392	0.183911
Bra019963	Bra022686	0.183744
Bra035179	Bra032557	0.183667
Bra004759	Bra009217	0.183659
Bra010035	Bra032557	0.183566
Bra018611	Bra018160	0.183485
Bra004759	Bra038548	0.183347
Bra031636	Bra031392	0.183129
Bra010035	Bra028911	0.182978
Bra035179	Bra001009	0.182972
Bra026167	Bra032415	0.18289
Bra028911	Bra033882	0.182685
Bra004227	Bra022692	0.182557
Bra038291	Bra018160	0.182373
Bra003998	Bra010743	0.182191
Bra003998	Bra001220	0.181976
Bra002286	Bra005987	0.181921
Bra004759	Bra017185	0.181791
Bra006879	Bra026784	0.181328
Bra035179	Bra012479	0.180991
Bra037207	Bra031392	0.18089
Bra006879	Bra020094	0.180758
Bra005987	Bra032557	0.180754
Bra017184	Bra031636	0.180612
Bra006879	Bra028697	0.180461
Bra037207	Bra002286	0.179605
Bra006722	Bra005175	0.179571
Bra005231	Bra035461	0.179384
Bra031031	Bra000659	0.179374
Bra017912	Bra017185	0.179339
Bra020094	Bra032415	0.179302
Bra006879	Bra031392	0.179246
Bra020094	Bra031031	0.178997
Bra038291	Bra017912	0.178712
Bra022692	Bra039808	0.178681
Bra018463	Bra022686	0.178555
Bra031392	Bra035461	0.178477
Bra021537	Bra037207	0.178201
Bra005987	Bra022686	0.178023
Bra010035	Bra010743	0.177872
Bra026167	Bra022692	0.177647
Bra038291	Bra005175	0.177338
Bra022686	Bra028911	0.177335
Bra021537	Bra022686	0.177327
Bra031031	Bra035461	0.17728
Bra005231	Bra010743	0.177108
Bra018611	Bra028697	0.177052
Bra017184	Bra022686	0.177016
Bra006641	Bra004759	0.176982
Bra023548	Bra010743	0.176822
Bra035179	Bra000659	0.17673
Bra028697	Bra031031	0.17606
Bra031031	Bra010743	0.175902
Bra035179	Bra028911	0.175885
Bra003998	Bra031031	0.175867
Bra019963	Bra033882	0.175478
Bra031392	Bra031031	0.175475
Bra010035	Bra005175	0.175451
Bra031031	Bra009217	0.175396
Bra006722	Bra039021	0.17539
Bra035461	Bra030505	0.175359
Bra037207	Bra001009	0.175171
Bra038291	Bra026838	0.175165
Bra000659	Bra017912	0.175043
Bra031636	Bra022686	0.174929
Bra021537	Bra030906	0.17479
Bra010744	Bra001220	0.174764
Bra018463	Bra032415	0.17445
Bra038291	Bra000659	0.174344
Bra031031	Bra033882	0.174294
Bra004009	Bra010743	0.174213
Bra006722	Bra006195	0.17391
Bra019963	Bra031031	0.173899
Bra010035	Bra033882	0.173886
Bra018463	Bra019963	0.173843
Bra010035	Bra031636	0.173665
Bra035461	Bra009217	0.173535
Bra019963	Bra028911	0.173523
Bra021537	Bra018463	0.173362
Bra004227	Bra026167	0.173052
Bra004759	Bra033882	0.172991
Bra028697	Bra028911	0.172942
Bra021537	Bra020094	0.172904
Bra026784	Bra012479	0.17264
Bra035607	Bra028506	0.172188
Bra003998	Bra033882	0.171936
Bra001220	Bra012479	0.171905
Bra003998	Bra028911	0.171865
Bra018463	Bra028911	0.171778
Bra019963	Bra004759	0.171698
Bra010035	Bra001220	0.171533
Bra017184	Bra028697	0.171522
Bra006879	Bra039808	0.171293
Bra035179	Bra006195	0.171168
Bra018611	Bra004227	0.17113
Bra017912	Bra028911	0.17112
Bra035179	Bra023122	0.171069
Bra006641	Bra022686	0.170866
Bra004227	Bra038291	0.170611
Bra037207	Bra031031	0.170608
Bra002286	Bra030906	0.170512
Bra010035	Bra006641	0.170382
Bra032557	Bra009217	0.170319
Bra002286	Bra010743	0.170306
Bra038291	Bra023190	0.170052
Bra018463	Bra012239	0.169984
Bra028697	Bra017912	0.169735
Bra004227	Bra031031	0.169579
Bra017184	Bra022692	0.169511
Bra006195	Bra001220	0.169448
Bra006195	Bra032415	0.169445
Bra031031	Bra039808	0.16929
Bra006879	Bra034599	0.169048
Bra019963	Bra031636	0.168949
Bra038548	Bra017912	0.168799
Bra038291	Bra012239	0.168581
Bra037207	Bra003998	0.168223
Bra037207	Bra028697	0.16817
Bra017912	Bra022686	0.167997
Bra022692	Bra000659	0.167993
Bra037207	Bra005175	0.167783
Bra004759	Bra035461	0.167693
Bra018463	Bra031636	0.167578
Bra006641	Bra031031	0.167523
Bra004227	Bra020094	0.167315
Bra010035	Bra031031	0.167138
Bra003998	Bra005175	0.167074
Bra005175	Bra033882	0.167047
Bra031392	Bra022686	0.166953
Bra002286	Bra028911	0.166926
Bra021537	Bra022692	0.166894
Bra018611	Bra002286	0.166815
Bra037207	Bra019963	0.166394
Bra032557	Bra017912	0.166086
Bra020507	Bra035607	0.166083
Bra019963	Bra010743	0.165902
Bra004009	Bra031392	0.165863
Bra004759	Bra006350	0.165806
Bra035461	Bra005175	0.165618
Bra021537	Bra028697	0.165556
Bra038291	Bra004009	0.165492
Bra010035	Bra030505	0.165482
Bra035179	Bra037207	0.165443
Bra006641	Bra031636	0.165251
Bra031031	Bra018160	0.164967
Bra017184	Bra010743	0.164873
Bra006722	Bra004009	0.164844
Bra005987	Bra028911	0.164777
Bra021537	Bra019963	0.164629
Bra017912	Bra039681	0.164569
Bra017184	Bra037207	0.164325
Bra031392	Bra033882	0.1642
Bra034599	Bra032557	0.164153
Bra031636	Bra022692	0.164069
Bra018463	Bra000659	0.16404
Bra020094	Bra023122	0.16387
Bra018611	Bra039808	0.163862
Bra002286	Bra019963	0.163756
Bra028697	Bra031636	0.163554
Bra038291	Bra026784	0.163441
Bra026838	Bra010743	0.163304
Bra006722	Bra012479	0.163264
Bra030906	Bra039681	0.163117
Bra020094	Bra022692	0.1631
Bra003998	Bra004759	0.162936
Bra035607	Bra031802	0.162687
Bra017912	Bra009217	0.162502
Bra010035	Bra031392	0.162495
Bra035179	Bra010743	0.162375
Bra031031	Bra030505	0.162208
Bra030505	Bra035607	0.162167
Bra028697	Bra020094	0.162112
Bra005231	Bra017912	0.162085
Bra017184	Bra028911	0.162068
Bra006879	Bra010744	0.161919
Bra019963	Bra035461	0.161563
Bra028697	Bra026784	0.161315
Bra005231	Bra031636	0.16124
Bra002286	Bra032415	0.16101
Bra017184	Bra026167	0.160793
Bra004759	Bra039681	0.160778
Bra037207	Bra005231	0.160731
Bra018463	Bra005231	0.16067
Bra030906	Bra038291	0.160583
Bra038548	Bra001220	0.16054
Bra030906	Bra031636	0.160539
Bra028697	Bra026167	0.160532
Bra035179	Bra006641	0.160461
Bra021537	Bra026167	0.16043
Bra001220	Bra023190	0.160323
Bra001220	Bra030505	0.159712
Bra037207	Bra035461	0.15965
Bra034599	Bra035461	0.159241
Bra031636	Bra005175	0.159217
Bra006879	Bra018160	0.159207
Bra038291	Bra022692	0.158978
Bra002286	Bra026784	0.158949
Bra037207	Bra010035	0.158866
Bra031636	Bra032415	0.15875
Bra018611	Bra031636	0.158496
Bra038548	Bra022692	0.157952
Bra004227	Bra032415	0.157894
Bra006641	Bra019963	0.157873
Bra028697	Bra032415	0.157705
Bra002286	Bra006641	0.157549
Bra034599	Bra019963	0.157535
Bra005987	Bra031031	0.157447
Bra002286	Bra022692	0.157429
Bra003998	Bra030505	0.157421
Bra022692	Bra030505	0.15741
Bra006195	Bra017912	0.157386
Bra031031	Bra023190	0.157223
Bra032557	Bra023190	0.157081
Bra019963	Bra023190	0.157051
Bra038291	Bra006195	0.157025
Bra035179	Bra005231	0.157005
Bra006722	Bra026838	0.156788
Bra022692	Bra009217	0.156687
Bra004227	Bra002286	0.156608
Bra022692	Bra039681	0.156537
Bra035461	Bra035607	0.156448
Bra010035	Bra009217	0.156369
Bra002286	Bra031636	0.156088
Bra006641	Bra033882	0.156005
Bra003998	Bra019963	0.155851
Bra035461	Bra022686	0.155714
Bra021537	Bra032415	0.155618
Bra006722	Bra030204	0.155564
Bra004227	Bra018463	0.155339
Bra032415	Bra018160	0.15531
Bra004009	Bra032557	0.155244
Bra035179	Bra038548	0.1552
Bra020094	Bra022686	0.154843
Bra017184	Bra021537	0.15442
Bra030906	Bra012479	0.154381
Bra022686	Bra033882	0.154377
Bra010035	Bra019963	0.15429
Bra035179	Bra010744	0.154065
Bra010035	Bra005231	0.153904
Bra005231	Bra031392	0.153745
Bra034599	Bra010035	0.153731
Bra037207	Bra009217	0.153706
Bra032557	Bra005175	0.153656
Bra006722	Bra038548	0.153374
Bra010744	Bra028911	0.153262
Bra001009	Bra031031	0.153041
Bra001009	Bra017912	0.152962
Bra004759	Bra023190	0.152876
Bra006879	Bra005175	0.152774
Bra004759	Bra030505	0.152712
Bra001009	Bra022692	0.152659
Bra018463	Bra039808	0.152536
Bra022686	Bra007417	0.152456
Bra022692	Bra032557	0.152443
Bra038291	Bra039808	0.152424
Bra030906	Bra022686	0.152324
Bra037207	Bra026838	0.152304
Bra009217	Bra010743	0.15226
Bra006879	Bra030204	0.152196
Bra018611	Bra032557	0.152061
Bra037207	Bra018463	0.151719
Bra030906	Bra006350	0.151632
Bra005231	Bra030505	0.151623
Bra031636	Bra023190	0.15147
Bra019963	Bra030204	0.151468
Bra030906	Bra032557	0.151414
Bra004759	Bra023122	0.151214
Bra028911	Bra005175	0.151208
Bra035461	Bra023190	0.151153
Bra021537	Bra018160	0.151084
Bra007417	Bra010743	0.150947
Bra020507	Bra035461	0.150919
Bra030505	Bra028911	0.15075
Bra005987	Bra031636	0.150565
Bra021537	Bra010744	0.150405
Bra018611	Bra021537	0.15033
Bra018611	Bra012479	0.150059
Bra021537	Bra005987	0.149825
Bra000659	Bra032415	0.149717
Bra035607	Bra027536	0.149699
Bra022692	Bra022686	0.149686
Bra024812	Bra035607	0.149655
Bra021537	Bra010743	0.149567
Bra018463	Bra031392	0.149455
Bra010035	Bra035607	0.149369
Bra032557	Bra007417	0.149229
Bra002286	Bra031392	0.14913
Bra033882	Bra023190	0.148937
Bra017184	Bra019963	0.148841
Bra001009	Bra002286	0.148774
Bra022692	Bra035461	0.148648
Bra022692	Bra028911	0.14862
Bra035179	Bra031392	0.148528
Bra032415	Bra022686	0.148514
Bra006350	Bra017912	0.148509
Bra034599	Bra033882	0.148493
Bra019963	Bra005231	0.148438
Bra038291	Bra030505	0.148407
Bra005231	Bra022692	0.148345
Bra009217	Bra028911	0.148219
Bra005231	Bra022686	0.148075
Bra030505	Bra032557	0.147968
Bra006195	Bra026784	0.147748
Bra034599	Bra038291	0.147713
Bra001009	Bra032557	0.147708
Bra010035	Bra004759	0.147625
Bra038291	Bra039021	0.147613
Bra034599	Bra003998	0.147202
Bra038291	Bra030332	0.14711
Bra030906	Bra005231	0.146877
Bra030906	Bra038548	0.146851
Bra005987	Bra017912	0.14676
Bra021537	Bra026784	0.146507
Bra023548	Bra032557	0.1465
Bra018463	Bra010743	0.146423
Bra035461	Bra017912	0.14606
Bra006641	Bra017912	0.146042
Bra035607	Bra031080	0.145902
Bra035179	Bra019963	0.145701
Bra037207	Bra017912	0.145663
Bra032557	Bra030332	0.145398
Bra019963	Bra031392	0.145046
Bra017184	Bra004227	0.145034
Bra021537	Bra031636	0.145019
Bra012833	Bra035607	0.14486
Bra031636	Bra009217	0.144829
Bra037207	Bra022692	0.144781
Bra035179	Bra009217	0.144779
Bra006879	Bra027536	0.144736
Bra028697	Bra030906	0.14469
Bra019963	Bra012239	0.144201
Bra006195	Bra031031	0.144198
Bra004227	Bra039808	0.143921
Bra030505	Bra017912	0.14389
Bra021537	Bra004227	0.143858
Bra032557	Bra032415	0.143834
Bra018611	Bra022686	0.143649
Bra026167	Bra039808	0.143489
Bra006879	Bra006195	0.143427
Bra010744	Bra019963	0.143392
Bra021537	Bra001009	0.143364
Bra003998	Bra031392	0.143343
Bra001009	Bra022686	0.143239
Bra030906	Bra028911	0.143221
Bra006641	Bra022692	0.143077
Bra037207	Bra007417	0.143002
Bra005231	Bra033882	0.142956
Bra017063	Bra014456	0.142917
Bra018463	Bra035461	0.142822
Bra001009	Bra010743	0.142804
Bra010744	Bra007417	0.142715
Bra001220	Bra017185	0.142586
Bra019963	Bra009217	0.142532
Bra030906	Bra017185	0.142393
Bra017184	Bra020094	0.14202
Bra018611	Bra006195	0.142016
Bra034599	Bra035607	0.142014
Bra002286	Bra005231	0.141938
Bra018611	Bra000659	0.141876
Bra003998	Bra022692	0.14178
Bra006722	Bra031136	0.141767
Bra020094	Bra032557	0.141591
Bra032557	Bra039021	0.141295
Bra002286	Bra023122	0.141284
Bra017912	Bra010743	0.140959
Bra022692	Bra018160	0.140958
Bra018463	Bra005987	0.140923
Bra023548	Bra022686	0.140917
Bra001220	Bra039021	0.140774
Bra031392	Bra017912	0.140768
Bra010744	Bra033882	0.140634
Bra020037	Bra010743	0.140204
Bra006722	Bra006350	0.140111
Bra023548	Bra028911	0.140023
Bra003998	Bra035607	0.139975
Bra031636	Bra030505	0.139833
Bra030906	Bra006195	0.139725
Bra006722	Bra039681	0.139504
Bra034599	Bra028911	0.139414
Bra021537	Bra028911	0.139348
Bra010035	Bra022686	0.139339
Bra006641	Bra003998	0.139277
Bra035179	Bra033882	0.139219
Bra021537	Bra006641	0.139205
Bra006879	Bra038548	0.139083
Bra018160	Bra022686	0.139061
Bra030505	Bra009217	0.138921
Bra010744	Bra004759	0.138908
Bra032415	Bra039808	0.138893
Bra006879	Bra017005	0.138877
Bra004009	Bra035461	0.138816
Bra000659	Bra026784	0.138516
Bra018463	Bra033882	0.138473
Bra037382	Bra032557	0.138392
Bra034599	Bra023190	0.138391
Bra006722	Bra023548	0.138285
Bra012239	Bra032557	0.138241
Bra028697	Bra019963	0.138156
Bra032557	Bra026838	0.138123
Bra010035	Bra003765	0.138061
Bra004227	Bra018160	0.138026
Bra038291	Bra037382	0.138001
Bra006195	Bra022692	0.137937
Bra006641	Bra030505	0.137904
Bra027536	Bra028506	0.137659
Bra019963	Bra000659	0.137653
Bra031636	Bra026784	0.137626
Bra001009	Bra030906	0.137214
Bra006879	Bra006350	0.137082
Bra034599	Bra030505	0.137017
Bra020507	Bra010035	0.136957
Bra010035	Bra022692	0.136836
Bra022692	Bra031136	0.136815
Bra037207	Bra032415	0.136808
Bra003998	Bra017912	0.136756
Bra030906	Bra030505	0.136755
Bra002286	Bra033882	0.136691
Bra020507	Bra030505	0.136691
Bra028697	Bra023548	0.136475
Bra037207	Bra023190	0.136384
Bra030505	Bra031136	0.136286
Bra019963	Bra022692	0.136281
Bra020037	Bra028911	0.136203
Bra022686	Bra026838	0.136038
Bra019963	Bra030332	0.136009
Bra026167	Bra022686	0.135808
Bra027536	Bra031802	0.135791
Bra019963	Bra017912	0.135688
Bra002286	Bra023548	0.135685
Bra032415	Bra028911	0.13568
Bra010744	Bra031636	0.135595
Bra030906	Bra009217	0.135574
Bra022692	Bra017185	0.135483
Bra000659	Bra032557	0.135477
Bra026784	Bra017185	0.135427
Bra006879	Bra003765	0.135014
Bra035607	Bra025213	0.134844
Bra012239	Bra026784	0.13484
Bra030906	Bra019963	0.134823
Bra010035	Bra023190	0.134555
Bra018611	Bra012239	0.134511
Bra001009	Bra019963	0.13441
Bra012239	Bra032415	0.134321
Bra005987	Bra019963	0.134282
Bra028697	Bra004227	0.134255
Bra019207	Bra035607	0.134185
Bra006722	Bra027536	0.134026
Bra032557	Bra018160	0.133828
Bra030505	Bra031080	0.133747
Bra010035	Bra004009	0.133733
Bra018611	Bra028911	0.133721
Bra026167	Bra032557	0.133593
Bra035607	Bra023190	0.133507
Bra002286	Bra007417	0.133482
Bra006722	Bra037382	0.133307
Bra031031	Bra012479	0.133303
Bra006722	Bra017185	0.133154
Bra030505	Bra033882	0.133136
Bra017184	Bra033882	0.133028
Bra005987	Bra032415	0.133
Bra006879	Bra039021	0.13288
Bra031636	Bra026838	0.132838
Bra002286	Bra035461	0.132816
Bra009217	Bra033882	0.132625
Bra028697	Bra031392	0.132584
Bra017912	Bra033882	0.132023
Bra026167	Bra012479	0.131981
Bra019963	Bra030505	0.13192
Bra006722	Bra020507	0.131825
Bra037207	Bra030906	0.131745
Bra030505	Bra028506	0.131705
Bra030505	Bra027536	0.131638
Bra028697	Bra018160	0.131508
Bra018611	Bra037207	0.131446
Bra022692	Bra006350	0.131372
Bra028697	Bra033882	0.131292
Bra005987	Bra035461	0.131277
Bra003998	Bra022686	0.131212
Bra018463	Bra006641	0.131172
Bra034599	Bra031031	0.131115
Bra026167	Bra023122	0.13101
Bra006879	Bra031080	0.130952
Bra006722	Bra031080	0.130688
Bra037207	Bra023548	0.130622
Bra024812	Bra027536	0.130571
Bra033882	Bra026838	0.130542
Bra005987	Bra033882	0.130507
Bra021537	Bra035461	0.130399
Bra038291	Bra010010	0.130344
Bra005987	Bra022692	0.130285
Bra006641	Bra031392	0.130126
Bra004009	Bra033882	0.130035
Bra020037	Bra030832	0.12998
Bra006879	Bra031136	0.129732
Bra035607	Bra029572	0.129579
Bra028697	Bra010744	0.129461
Bra038291	Bra030204	0.129461
Bra022692	Bra012479	0.129455
Bra001220	Bra006350	0.12943
Bra010035	Bra027536	0.129253
Bra032557	Bra030204	0.129192
Bra035461	Bra027536	0.129184
Bra035179	Bra006350	0.129178
Bra020037	Bra004009	0.129157
Bra006879	Bra025920	0.129136
Bra004759	Bra039021	0.129123
Bra034599	Bra031636	0.129074
Bra035607	Bra039105	0.12897
Bra023548	Bra010823	0.128907
Bra004009	Bra031636	0.128842
Bra030906	Bra035461	0.128824
Bra020037	Bra031392	0.128728
Bra001220	Bra005175	0.128652
Bra022692	Bra010743	0.128642
Bra017184	Bra035461	0.128597
Bra020507	Bra027536	0.128595
Bra037382	Bra019963	0.128582
Bra006722	Bra021322	0.128516
Bra018463	Bra006195	0.128492
Bra018611	Bra005231	0.128335
Bra003998	Bra005231	0.128174
Bra020037	Bra038291	0.12817
Bra002286	Bra039808	0.128134
Bra006879	Bra035607	0.128092
Bra005231	Bra032415	0.127991
Bra001009	Bra006641	0.127965
Bra010744	Bra006641	0.127618
Bra003765	Bra035607	0.127563
Bra006722	Bra007417	0.127551
Bra031031	Bra039021	0.127545
Bra028911	Bra026838	0.127514
Bra037207	Bra000659	0.12742
Bra006722	Bra035607	0.127384
Bra031392	Bra030505	0.127383
Bra003998	Bra009217	0.127378
Bra017184	Bra018160	0.127361
Bra031392	Bra023548	0.127357
Bra028697	Bra005987	0.127335
Bra010744	Bra005987	0.127225
Bra010035	Bra017912	0.1272
Bra001220	Bra026838	0.127014
Bra032415	Bra010743	0.126962
Bra003998	Bra027536	0.126935
Bra006879	Bra026838	0.126867
Bra018611	Bra019963	0.126791
Bra018463	Bra009217	0.126746
Bra027536	Bra023190	0.126612
Bra005987	Bra006641	0.126595
Bra006879	Bra012479	0.126564
Bra035461	Bra003765	0.12649
Bra028697	Bra022692	0.126398
Bra038548	Bra026784	0.126271
Bra003998	Bra023190	0.126119
Bra010743	Bra023190	0.126062
Bra031031	Bra038548	0.126047
Bra019963	Bra032415	0.125922
Bra019645	Bra035607	0.125904
Bra038291	Bra008858	0.125898
Bra034599	Bra037382	0.125838
Bra034599	Bra006641	0.125738
Bra030505	Bra010743	0.125686
Bra031636	Bra026167	0.125671
Bra022692	Bra033882	0.125661
Bra006722	Bra030332	0.125432
Bra021322	Bra018463	0.1254
Bra001009	Bra018463	0.125375
Bra006722	Bra003765	0.125329
Bra026784	Bra022686	0.125209
Bra038291	Bra010795	0.125162
Bra002286	Bra006195	0.125133
Bra001220	Bra039681	0.125108
Bra034599	Bra010743	0.125032
Bra035461	Bra031136	0.125025
Bra022692	Bra023190	0.124964
Bra035179	Bra017185	0.12493
Bra012833	Bra031802	0.124913
Bra037207	Bra010795	0.124818
Bra017005	Bra027536	0.12475
Bra021537	Bra033882	0.124705
Bra010035	Bra005987	0.124478
Bra035179	Bra035461	0.124377
Bra031031	Bra006350	0.124364
Bra006722	Bra003850	0.124288
Bra030505	Bra023190	0.124225
Bra034599	Bra001220	0.124193
Bra031031	Bra030204	0.124167
Bra005987	Bra031392	0.124139
Bra019522	Bra035607	0.123923
Bra010744	Bra031031	0.123708
Bra020713	Bra022692	0.123661
Bra001009	Bra005987	0.123604
Bra017912	Bra031136	0.123557
Bra037207	Bra003850	0.123553
Bra001220	Bra023122	0.123526
Bra018463	Bra003998	0.12352
Bra018463	Bra030505	0.12344
Bra034599	Bra009217	0.123352
Bra022692	Bra031080	0.123276
Bra009217	Bra022686	0.123259
Bra037207	Bra020094	0.122972
Bra003765	Bra027536	0.122971
Bra030906	Bra005987	0.122866
Bra037207	Bra034599	0.122611
Bra032415	Bra012479	0.122569
Bra034599	Bra005231	0.122512
Bra037207	Bra010010	0.122395
Bra001009	Bra010744	0.122341
Bra034599	Bra012833	0.122222
Bra037207	Bra030505	0.122219
Bra006879	Bra021322	0.122113
Bra031392	Bra022692	0.122062
Bra002286	Bra000659	0.121906
Bra028911	Bra023190	0.121813
Bra021322	Bra038291	0.12179
Bra006641	Bra009217	0.121736
Bra026784	Bra023122	0.121537
Bra035461	Bra031802	0.12153
Bra017912	Bra023190	0.12145
Bra019963	Bra005175	0.121394
Bra020094	Bra031636	0.121354
Bra027536	Bra031080	0.121326
Bra009217	Bra035607	0.12132
Bra037207	Bra030332	0.121256
Bra004227	Bra022686	0.121087
Bra021322	Bra004759	0.121009
Bra035179	Bra003998	0.120968
Bra034599	Bra022686	0.12096
Bra003850	Bra038291	0.120896
Bra006722	Bra010983	0.120748
Bra018611	Bra005987	0.120736
Bra002286	Bra012239	0.12068
Bra034599	Bra027536	0.120615
Bra018611	Bra010743	0.120599
Bra031392	Bra032415	0.120508
Bra034599	Bra031802	0.120437
Bra018611	Bra031392	0.120343
Bra010744	Bra023548	0.12017
Bra038548	Bra032415	0.119947
Bra010744	Bra018463	0.119846
Bra006879	Bra003850	0.119801
Bra017184	Bra031392	0.119696
Bra002286	Bra009217	0.119638
Bra031031	Bra039681	0.119533
Bra006722	Bra028506	0.119526
Bra030906	Bra006641	0.119277
Bra006722	Bra010795	0.119208
Bra034599	Bra030204	0.119149
Bra032415	Bra033882	0.11912
Bra034599	Bra005175	0.119037
Bra017005	Bra035607	0.118837
Bra010010	Bra010743	0.118826
Bra020507	Bra003998	0.118768
Bra001009	Bra031636	0.118698
Bra001220	Bra023548	0.118627
Bra006879	Bra028506	0.118509
Bra030906	Bra023190	0.118441
Bra020094	Bra039808	0.118308
Bra037207	Bra006195	0.118282
Bra000659	Bra022686	0.11828
Bra035461	Bra031080	0.118179
Bra006879	Bra031802	0.118173
Bra030906	Bra003998	0.118164
Bra001009	Bra032415	0.118075
Bra031636	Bra023548	0.117856
Bra010035	Bra013895	0.117662
Bra030906	Bra031392	0.117634
Bra006879	Bra010983	0.11729
Bra010795	Bra010743	0.117159
Bra010744	Bra010010	0.117127
Bra001009	Bra028911	0.117056
Bra004227	Bra032557	0.116975
Bra017184	Bra005987	0.116782
Bra031031	Bra005175	0.116774
Bra019963	Bra018160	0.116774
Bra035461	Bra032415	0.11672
Bra019963	Bra020094	0.116689
Bra023548	Bra033882	0.116646
Bra035461	Bra028506	0.116606
Bra012833	Bra027536	0.116604
Bra018463	Bra023190	0.116525
Bra006879	Bra012833	0.11652
Bra021537	Bra031392	0.11636
Bra003998	Bra032415	0.116235
Bra021537	Bra000659	0.116083
Bra021537	Bra005231	0.116077
Bra010744	Bra035461	0.116056
Bra020507	Bra034599	0.116008
Bra010035	Bra018463	0.115963
Bra030505	Bra022686	0.11595
Bra028697	Bra035461	0.115934
Bra031136	Bra035607	0.115921
Bra017005	Bra003765	0.11592
Bra010035	Bra002286	0.115917
Bra001220	Bra030204	0.115769
Bra004759	Bra030204	0.115751
Bra006722	Bra012833	0.115674
Bra018463	Bra039021	0.11562
Bra017184	Bra005231	0.11562
Bra003998	Bra003765	0.115525
Bra037207	Bra026167	0.115268
Bra030906	Bra010743	0.115207
Bra001009	Bra035461	0.11508
Bra035607	Bra033882	0.115078
Bra004227	Bra012479	0.115064
Bra030505	Bra039681	0.115035
Bra037207	Bra004227	0.115033
Bra017184	Bra006195	0.114972
Bra019963	Bra026167	0.114906
Bra037207	Bra037382	0.114895
Bra035461	Bra026838	0.114715
Bra026784	Bra028911	0.114689
Bra032557	Bra026784	0.114673
Bra019963	Bra035607	0.114622
Bra020507	Bra006879	0.114606
Bra004009	Bra001220	0.114535
Bra030906	Bra033882	0.114535
Bra019645	Bra027536	0.114417
Bra006879	Bra037382	0.114364
Bra004227	Bra031636	0.114209
Bra035179	Bra023190	0.114193
Bra012833	Bra035461	0.114191
Bra018463	Bra012479	0.114118
Bra006722	Bra017005	0.114094
Bra013895	Bra035461	0.114084
Bra037207	Bra004009	0.114023
Bra010744	Bra031392	0.114002
Bra001220	Bra031136	0.113976
Bra030505	Bra005175	0.113855
Bra010035	Bra010744	0.113758
Bra030505	Bra025213	0.113747
Bra021322	Bra031031	0.113736
Bra021537	Bra012239	0.113721
Bra010035	Bra026838	0.113565
Bra037382	Bra035461	0.113524
Bra012239	Bra022686	0.113511
Bra038291	Bra038548	0.113508
Bra037207	Bra012239	0.113327
Bra006879	Bra027927	0.113308
Bra031636	Bra000659	0.11325
Bra037382	Bra033882	0.113232
Bra034599	Bra031392	0.113085
Bra034599	Bra018463	0.113085
Bra021537	Bra039808	0.112973
Bra004009	Bra003998	0.112941
Bra027536	Bra025213	0.11289
Bra028911	Bra007417	0.112866
Bra022686	Bra005175	0.112732
Bra021537	Bra010035	0.112596
Bra006722	Bra008858	0.112538
Bra006722	Bra031802	0.112505
Bra019963	Bra026838	0.112488
Bra019207	Bra027536	0.112309
Bra018611	Bra035461	0.112298
Bra028911	Bra039021	0.112093
Bra006879	Bra039681	0.112087
Bra020507	Bra031802	0.112022
Bra012833	Bra030505	0.111942
Bra001009	Bra004227	0.111941
Bra031802	Bra039105	0.111924
Bra019963	Bra025920	0.111921
Bra012833	Bra028506	0.111901
Bra006195	Bra031636	0.111875
Bra037382	Bra010743	0.11184
Bra022686	Bra023190	0.111774
Bra034599	Bra003765	0.111735
Bra038291	Bra023122	0.111679
Bra030505	Bra031802	0.111642
Bra033882	Bra030332	0.111463
Bra006722	Bra013895	0.111452
Bra003850	Bra001220	0.111434
Bra002286	Bra003998	0.111433
Bra005231	Bra026784	0.111399
Bra026784	Bra039681	0.11138
Bra009217	Bra027536	0.111379
Bra012239	Bra000659	0.111355
Bra031392	Bra005175	0.11117
Bra037207	Bra010983	0.11109
Bra034599	Bra030332	0.11109
Bra006722	Bra025920	0.111054
Bra006195	Bra022686	0.11101
Bra001220	Bra007417	0.110994
Bra032557	Bra039808	0.110981
Bra022692	Bra027536	0.110945
Bra010743	Bra030332	0.110913
Bra027536	Bra029572	0.110911
Bra035179	Bra010035	0.110881
Bra024812	Bra039105	0.110837
Bra019645	Bra024812	0.110749
Bra037207	Bra003765	0.110619
Bra018463	Bra030204	0.110618
Bra006879	Bra030332	0.110617
Bra028697	Bra023122	0.110579
Bra008858	Bra010743	0.110546
Bra035461	Bra039021	0.110542
Bra020507	Bra012833	0.11054
Bra004227	Bra012239	0.110525
Bra010035	Bra030906	0.110373
Bra008858	Bra032557	0.110286
Bra004009	Bra027238	0.11018
Bra004759	Bra031136	0.110139
Bra020094	Bra028911	0.110066
Bra038291	Bra012479	0.109989
Bra021322	Bra019963	0.109932
Bra006641	Bra032415	0.109879
Bra031031	Bra017185	0.109871
Bra005987	Bra026784	0.109863
Bra019963	Bra007417	0.109839
Bra017184	Bra010035	0.109774
Bra012239	Bra026167	0.109692
Bra018611	Bra017185	0.109564
Bra035179	Bra039021	0.109519
Bra006641	Bra005175	0.109392
Bra031636	Bra035607	0.109378
Bra032557	Bra035607	0.109363
Bra021537	Bra009217	0.109348
Bra005987	Bra003998	0.109042
Bra018611	Bra033882	0.108896
Bra021322	Bra001220	0.108835
Bra035607	Bra021213	0.108725
Bra018611	Bra023122	0.108612
Bra010035	Bra037382	0.108569
Bra019963	Bra039021	0.10845
Bra006879	Bra010795	0.108309
Bra019963	Bra027536	0.108188
Bra021537	Bra023122	0.108175
Bra026167	Bra006350	0.108172
Bra035179	Bra030505	0.108141
Bra027536	Bra039105	0.108073
Bra006722	Bra023122	0.10806
Bra017184	Bra000659	0.107954
Bra006722	Bra020037	0.10781
Bra022686	Bra030332	0.107651
Bra020037	Bra032557	0.107621
Bra031031	Bra035607	0.107357
Bra032415	Bra009217	0.107293
Bra017912	Bra039021	0.107248
Bra004385	Bra035607	0.107239
Bra026167	Bra028911	0.107146
Bra031636	Bra039808	0.107144
Bra031031	Bra027536	0.10711
Bra035179	Bra021322	0.107018
Bra038291	Bra012777	0.106975
Bra030505	Bra003765	0.106899
Bra017184	Bra003998	0.106757
Bra003998	Bra013895	0.10663
Bra006195	Bra010743	0.106628
Bra022692	Bra010983	0.106619
Bra004227	Bra005987	0.106548
Bra006879	Bra025213	0.106506
Bra034599	Bra004759	0.106379
Bra006350	Bra026784	0.106352
Bra026167	Bra000659	0.106338
Bra006641	Bra005231	0.106332
Bra010035	Bra031802	0.106327
Bra021537	Bra030505	0.106231
Bra038291	Bra010983	0.106192
Bra024812	Bra031802	0.106151
Bra006195	Bra032557	0.106131
Bra006879	Bra018184	0.106042
Bra001009	Bra033882	0.105963
Bra027536	Bra033882	0.105853
Bra012239	Bra031636	0.105754
Bra035607	Bra005175	0.105677
Bra020094	Bra010743	0.105571
Bra005987	Bra026167	0.105461
Bra018611	Bra006350	0.105432
Bra006879	Bra024812	0.105417
Bra010035	Bra031080	0.105337
Bra022692	Bra021213	0.105263
Bra018611	Bra038548	0.10526
Bra008858	Bra031392	0.10514
Bra030906	Bra030204	0.105093
Bra030505	Bra032415	0.104922
Bra032415	Bra023190	0.104892
Bra027536	Bra021213	0.104863
Bra012833	Bra023190	0.104861
Bra010035	Bra012833	0.1048
Bra010035	Bra001009	0.104757
Bra021537	Bra006195	0.104734
Bra006195	Bra026167	0.104693
Bra017184	Bra012239	0.104384
Bra028697	Bra006641	0.104295
Bra014716	Bra038291	0.104137
Bra001009	Bra028697	0.104098
Bra003850	Bra022692	0.104028
Bra021322	Bra030906	0.10386
Bra021537	Bra007417	0.103811
Bra021537	Bra034599	0.103809
Bra010035	Bra028697	0.103768
Bra038291	Bra003765	0.103766
Bra034599	Bra013895	0.103764
Bra018463	Bra006350	0.103742
Bra012833	Bra019522	0.103615
Bra004227	Bra019963	0.103524
Bra031392	Bra026838	0.103494
Bra022686	Bra039808	0.103249
Bra002286	Bra039021	0.103224
Bra031031	Bra031136	0.103218
Bra002286	Bra010010	0.103178
Bra006879	Bra013895	0.103139
Bra018611	Bra001009	0.103092
Bra021322	Bra032557	0.103024
Bra028697	Bra007417	0.103001
Bra004759	Bra026838	0.102982
Bra006879	Bra021213	0.102953
Bra031636	Bra027536	0.102776
Bra012777	Bra032557	0.102686
Bra018463	Bra023122	0.102674
Bra006722	Bra025213	0.102654
Bra008858	Bra028911	0.102544
Bra003998	Bra026838	0.102533
Bra012833	Bra025213	0.102376
Bra037207	Bra014716	0.102301
Bra034599	Bra022692	0.102166
Bra020507	Bra028506	0.102046
Bra021537	Bra003998	0.101958
Bra004009	Bra031031	0.101855
Bra035607	Bra028911	0.1018
Bra004009	Bra022686	0.101732
Bra005987	Bra020094	0.101686
Bra037207	Bra018160	0.101667
Bra022692	Bra028506	0.101663
Bra004759	Bra025920	0.101657
Bra030906	Bra039021	0.101579
Bra022686	Bra039021	0.101408
Bra010035	Bra031136	0.101364
Bra002286	Bra030505	0.101349
Bra035179	Bra039681	0.101295
Bra028697	Bra005231	0.101289
Bra037207	Bra026784	0.101195
Bra028911	Bra039808	0.101193
Bra006722	Bra021213	0.101174
Bra006722	Bra018184	0.101162
Bra004227	Bra006195	0.100983
Bra037207	Bra013895	0.100981
Bra010035	Bra010795	0.100977
Bra030906	Bra031136	0.100939
Bra024812	Bra012833	0.100917
Bra013895	Bra033882	0.100905
Bra022692	Bra017005	0.1009
Bra010035	Bra032415	0.100853
Bra006879	Bra004009	0.100829
Bra038291	Bra018184	0.100783
Bra023122	Bra022686	0.100766
Bra010010	Bra022686	0.100764
Bra017912	Bra023122	0.10073
Bra021322	Bra000659	0.100728
Bra006879	Bra007417	0.100704
Bra012833	Bra029572	0.100684
Bra035179	Bra023548	0.100683
Bra017184	Bra030505	0.100672
Bra003850	Bra004759	0.100641
Bra004227	Bra038548	0.100575
Bra019963	Bra012833	0.100329
Bra017184	Bra039808	0.100326
Bra020507	Bra033882	0.100309
Bra022692	Bra039021	0.100195
Bra019961	Bra038291	0.100127
Bra003765	Bra010743	0.100074
Bra006641	Bra035607	0.100057
Bra032557	Bra027536	0.100029

## Sheet: pink
fromNode	toNode	weight
Bra035933	Bra012964	0.169116
Bra035690	Bra005164	0.147027
Bra010212	Bra031424	0.139532
Bra019893	Bra011736	0.123886
Bra027133	Bra038180	0.120259
Bra031424	Bra010569	0.117649
Bra010212	Bra010569	0.11567
Bra030498	Bra006263	0.113823
Bra027723	Bra010513	0.113364
Bra011736	Bra010569	0.112954
Bra027133	Bra011736	0.11237
Bra026629	Bra010513	0.112066
Bra027133	Bra010212	0.110493
Bra027133	Bra005718	0.109382
Bra031424	Bra017584	0.108928
Bra018532	Bra031422	0.107764
Bra036918	Bra024214	0.107661
Bra027133	Bra010569	0.106211
Bra012337	Bra002686	0.106124
Bra010212	Bra011736	0.105926
Bra032894	Bra018532	0.105304
Bra008343	Bra015634	0.105043
Bra026629	Bra027723	0.10434
Bra010212	Bra038380	0.10343
Bra035690	Bra012263	0.103015
Bra026629	Bra031422	0.10235
Bra010212	Bra017584	0.101495
Bra014559	Bra020847	0.100111

## Sheet: purple
fromNode	toNode	weight
Bra005784	Bra014187	0.277645
Bra011477	Bra005784	0.262126
Bra005784	Bra032033	0.254141
Bra020305	Bra005784	0.246873
Bra005784	Bra018105	0.240643
Bra011477	Bra014187	0.234886
Bra020305	Bra032033	0.229088
Bra005784	Bra029784	0.221034
Bra014187	Bra032033	0.215948
Bra011477	Bra032033	0.210679
Bra020305	Bra014187	0.206135
Bra005784	Bra039730	0.204374
Bra018105	Bra014187	0.201404
Bra013846	Bra005784	0.200941
Bra000643	Bra005784	0.200936
Bra011477	Bra020305	0.199394
Bra020305	Bra018105	0.198749
Bra005784	Bra023970	0.197906
Bra034084	Bra004256	0.197289
Bra005784	Bra008508	0.195923
Bra005784	Bra031125	0.195717
Bra011477	Bra018105	0.191174
Bra005784	Bra034084	0.190948
Bra005784	Bra019652	0.189247
Bra005784	Bra004023	0.188531
Bra005784	Bra036708	0.188205
Bra004256	Bra010941	0.188093
Bra040286	Bra010941	0.186545
Bra000643	Bra014187	0.185725
Bra003498	Bra004256	0.182988
Bra018105	Bra032033	0.181006
Bra003498	Bra031178	0.180237
Bra005784	Bra021724	0.179669
Bra037714	Bra003498	0.178359
Bra020305	Bra029784	0.176525
Bra020305	Bra023970	0.176147
Bra000643	Bra020305	0.175783
Bra005784	Bra004256	0.17572
Bra011477	Bra029784	0.17453
Bra005784	Bra031178	0.173777
Bra040286	Bra004256	0.173059
Bra029784	Bra023970	0.172767
Bra003498	Bra011313	0.172285
Bra029784	Bra014187	0.172194
Bra003498	Bra010941	0.171843
Bra005784	Bra006702	0.17051
Bra005784	Bra001276	0.170404
Bra040286	Bra005784	0.170136
Bra040286	Bra034084	0.168269
Bra014858	Bra003498	0.168128
Bra039730	Bra002547	0.167917
Bra000643	Bra039730	0.167681
Bra005784	Bra003498	0.167362
Bra011477	Bra036708	0.167215
Bra011477	Bra039730	0.167199
Bra029784	Bra032033	0.166356
Bra014858	Bra037714	0.165441
Bra000643	Bra011477	0.165107
Bra014187	Bra039730	0.16489
Bra013846	Bra018105	0.164512
Bra020305	Bra008508	0.164276
Bra020305	Bra036708	0.164137
Bra014858	Bra010941	0.16362
Bra032033	Bra023970	0.163223
Bra037714	Bra004256	0.162592
Bra013846	Bra014187	0.162248
Bra005784	Bra009947	0.162113
Bra000643	Bra018105	0.161683
Bra013846	Bra020305	0.161579
Bra000643	Bra032033	0.161029
Bra005784	Bra010941	0.159289
Bra020305	Bra039730	0.158803
Bra039730	Bra026774	0.158448
Bra011477	Bra019652	0.158438
Bra018105	Bra039730	0.158254
Bra014187	Bra034084	0.157644
Bra014858	Bra007701	0.157629
Bra011477	Bra023970	0.157493
Bra007519	Bra007701	0.157324
Bra014187	Bra006702	0.15563
Bra013846	Bra011477	0.155435
Bra011477	Bra031125	0.155293
Bra018105	Bra006702	0.155188
Bra040286	Bra003498	0.155091
Bra014858	Bra028814	0.154731
Bra007519	Bra028814	0.154603
Bra008508	Bra018105	0.154551
Bra014858	Bra031178	0.154382
Bra014187	Bra036708	0.154296
Bra020305	Bra006702	0.154037
Bra005784	Bra036676	0.153887
Bra028814	Bra007701	0.15384
Bra004256	Bra031178	0.153649
Bra008508	Bra029784	0.153318
Bra037714	Bra031178	0.152983
Bra028814	Bra036618	0.152028
Bra005784	Bra002547	0.151871
Bra040286	Bra037714	0.151659
Bra032721	Bra003498	0.151001
Bra037714	Bra010941	0.150792
Bra011477	Bra031178	0.150749
Bra020305	Bra002547	0.150668
Bra008508	Bra014187	0.150594
Bra014187	Bra004023	0.150554
Bra014187	Bra031125	0.150368
Bra037714	Bra026455	0.150316
Bra014858	Bra011313	0.150088
Bra019652	Bra014187	0.149973
Bra003498	Bra036676	0.149471
Bra018105	Bra002547	0.148574
Bra003498	Bra036618	0.148426
Bra003498	Bra026399	0.148107
Bra011477	Bra008508	0.147971
Bra003498	Bra007701	0.147492
Bra011477	Bra004023	0.147195
Bra028814	Bra006481	0.147147
Bra014187	Bra023970	0.147023
Bra003498	Bra021724	0.146405
Bra014858	Bra026455	0.146259
Bra007701	Bra006481	0.146111
Bra013846	Bra039730	0.146108
Bra014858	Bra036618	0.145144
Bra028814	Bra036676	0.145024
Bra034084	Bra010941	0.1447
Bra011477	Bra034084	0.144523
Bra036618	Bra006481	0.144447
Bra029784	Bra018105	0.144185
Bra002547	Bra000204	0.143919
Bra003498	Bra034084	0.143437
Bra005784	Bra007701	0.143206
Bra003498	Bra028814	0.143083
Bra011477	Bra036676	0.142938
Bra031125	Bra021724	0.142895
Bra026399	Bra004256	0.142609
Bra040286	Bra037838	0.142166
Bra018106	Bra006481	0.142117
Bra014858	Bra004256	0.141707
Bra002547	Bra026774	0.141601
Bra028814	Bra001213	0.141287
Bra032721	Bra014858	0.140999
Bra020305	Bra019652	0.140786
Bra011477	Bra021724	0.14069
Bra011477	Bra001276	0.140578
Bra014858	Bra007519	0.140487
Bra018105	Bra026774	0.139882
Bra003498	Bra004023	0.139572
Bra007519	Bra036618	0.139504
Bra020305	Bra031125	0.139398
Bra007701	Bra036618	0.139209
Bra014187	Bra004256	0.139209
Bra003498	Bra026455	0.139042
Bra003498	Bra031125	0.138897
Bra018105	Bra034084	0.138071
Bra009109	Bra000450	0.138003
Bra014187	Bra021724	0.137772
Bra039730	Bra032033	0.137667
Bra007519	Bra006481	0.137636
Bra014858	Bra004528	0.137015
Bra014858	Bra036676	0.136808
Bra007519	Bra001213	0.136592
Bra028814	Bra011313	0.136074
Bra014187	Bra031178	0.135978
Bra011477	Bra003498	0.135636
Bra034084	Bra026774	0.135552
Bra003498	Bra014187	0.135536
Bra005784	Bra018106	0.135024
Bra011477	Bra004256	0.134942
Bra002547	Bra032033	0.134788
Bra005784	Bra026774	0.134357
Bra032033	Bra036708	0.134043
Bra014858	Bra040286	0.133932
Bra018105	Bra023970	0.133348
Bra004256	Bra006076	0.133179
Bra005784	Bra037714	0.133091
Bra006481	Bra004023	0.132851
Bra013846	Bra000643	0.132825
Bra013740	Bra037765	0.132107
Bra004528	Bra028814	0.132015
Bra014858	Bra021724	0.131883
Bra005784	Bra011313	0.131392
Bra040286	Bra031178	0.131276
Bra020305	Bra034084	0.130969
Bra014187	Bra002547	0.130859
Bra040286	Bra014187	0.130645
Bra019652	Bra032033	0.130201
Bra037714	Bra011313	0.130181
Bra019652	Bra018105	0.129834
Bra011477	Bra006702	0.129684
Bra018105	Bra031125	0.129452
Bra028814	Bra031178	0.129383
Bra014858	Bra026399	0.129376
Bra007701	Bra004023	0.129031
Bra000643	Bra002547	0.128975
Bra037714	Bra036676	0.128925
Bra031125	Bra032033	0.12884
Bra029784	Bra031125	0.128741
Bra003498	Bra006481	0.128672
Bra008508	Bra039730	0.12841
Bra020305	Bra001276	0.128278
Bra020305	Bra009947	0.128222
Bra014858	Bra006481	0.128173
Bra011477	Bra009947	0.128066
Bra006702	Bra034084	0.12788
Bra007701	Bra036676	0.127555
Bra040286	Bra011477	0.12734
Bra031125	Bra004023	0.127038
Bra014187	Bra010941	0.12686
Bra018105	Bra036708	0.126633
Bra020305	Bra004023	0.125751
Bra005784	Bra028814	0.125339
Bra006702	Bra032033	0.125325
Bra006481	Bra031125	0.125309
Bra014187	Bra001276	0.125272
Bra007701	Bra011313	0.125134
Bra006481	Bra001213	0.124764
Bra040286	Bra021724	0.124602
Bra013846	Bra002547	0.124385
Bra006702	Bra039730	0.124005
Bra008508	Bra032033	0.124004
Bra037714	Bra028814	0.123806
Bra018105	Bra001276	0.123702
Bra032129	Bra026774	0.123357
Bra032721	Bra004256	0.123274
Bra007519	Bra026287	0.123257
Bra037714	Bra007701	0.123047
Bra037714	Bra034084	0.122955
Bra004256	Bra019447	0.122563
Bra006481	Bra021724	0.122286
Bra007519	Bra012695	0.122078
Bra013846	Bra026774	0.122049
Bra007519	Bra004528	0.121942
Bra007701	Bra031125	0.121675
Bra011313	Bra031178	0.12138
Bra013846	Bra029784	0.12131
Bra013846	Bra032033	0.121287
Bra007701	Bra031178	0.121112
Bra003498	Bra019529	0.121016
Bra034084	Bra039730	0.120627
Bra011477	Bra006481	0.120343
Bra005784	Bra036618	0.120265
Bra014858	Bra001213	0.120038
Bra013846	Bra031125	0.119964
Bra009947	Bra014187	0.119846
Bra007519	Bra018106	0.119741
Bra039730	Bra001276	0.119718
Bra040326	Bra006481	0.119617
Bra007701	Bra026455	0.119521
Bra007519	Bra040326	0.119424
Bra000643	Bra034084	0.119224
Bra034084	Bra002547	0.119106
Bra006481	Bra011313	0.118553
Bra011477	Bra010941	0.118531
Bra011477	Bra007701	0.11829
Bra014858	Bra004023	0.118083
Bra011477	Bra028814	0.118071
Bra011313	Bra004256	0.118044
Bra020305	Bra021724	0.118044
Bra039730	Bra000450	0.117746
Bra032721	Bra010941	0.117317
Bra036676	Bra011313	0.117277
Bra000368	Bra004887	0.117168
Bra032721	Bra040286	0.11711
Bra020305	Bra026774	0.116942
Bra005784	Bra006481	0.116898
Bra019652	Bra036708	0.116863
Bra040286	Bra026455	0.116434
Bra009109	Bra020305	0.116412
Bra011477	Bra002547	0.116248
Bra013846	Bra008508	0.116219
Bra014858	Bra005784	0.116129
Bra029784	Bra039730	0.115838
Bra003498	Bra018105	0.115786
Bra010941	Bra031178	0.115776
Bra005784	Bra026455	0.115687
Bra005784	Bra019447	0.115494
Bra036676	Bra014187	0.115491
Bra028814	Bra018106	0.115365
Bra000643	Bra029784	0.115118
Bra018105	Bra004023	0.11505
Bra030925	Bra008283	0.114895
Bra028814	Bra021724	0.114782
Bra009109	Bra037765	0.11473
Bra028814	Bra004023	0.114703
Bra028814	Bra026455	0.114656
Bra031125	Bra004256	0.114207
Bra000643	Bra026774	0.113955
Bra029784	Bra034084	0.113689
Bra026287	Bra006481	0.113583
Bra006702	Bra002547	0.113385
Bra007519	Bra004023	0.113372
Bra007701	Bra021724	0.113176
Bra036618	Bra011313	0.113011
Bra007701	Bra010941	0.112938
Bra040286	Bra031125	0.112888
Bra008508	Bra031125	0.112847
Bra004256	Bra021724	0.112684
Bra009109	Bra032033	0.112644
Bra014858	Bra031125	0.112558
Bra003498	Bra019447	0.112409
Bra008508	Bra023970	0.112084
Bra007519	Bra003498	0.11196
Bra034084	Bra019447	0.1118
Bra029784	Bra019652	0.111538
Bra006702	Bra004256	0.111422
Bra026399	Bra010941	0.11137
Bra036618	Bra036676	0.111317
Bra006702	Bra026774	0.111124
Bra034084	Bra031125	0.110891
Bra013846	Bra001276	0.110865
Bra008508	Bra026774	0.110698
Bra007519	Bra017043	0.110563
Bra031125	Bra039730	0.110538
Bra018105	Bra004256	0.110469
Bra007519	Bra029702	0.110383
Bra013846	Bra019652	0.110352
Bra026150	Bra026774	0.110188
Bra014187	Bra026774	0.110184
Bra007701	Bra004256	0.110112
Bra014187	Bra006481	0.109669
Bra029784	Bra036708	0.109597
Bra019652	Bra004023	0.109553
Bra031125	Bra031178	0.109478
Bra007701	Bra014187	0.109345
Bra009947	Bra029784	0.109305
Bra013846	Bra003498	0.109243
Bra008508	Bra034084	0.109099
Bra019652	Bra031125	0.108635
Bra011477	Bra018106	0.108579
Bra028814	Bra031125	0.108544
Bra029784	Bra006702	0.108507
Bra036676	Bra006481	0.108443
Bra005784	Bra040326	0.108433
Bra036676	Bra004256	0.108312
Bra009109	Bra013740	0.108191
Bra003498	Bra018106	0.108164
Bra031125	Bra001276	0.108054
Bra007677	Bra028814	0.108034
Bra040286	Bra011313	0.107745
Bra009109	Bra005784	0.107732
Bra011477	Bra011313	0.107701
Bra034084	Bra031178	0.107649
Bra018106	Bra007701	0.107574
Bra040286	Bra020305	0.107506
Bra040286	Bra019447	0.107418
Bra026455	Bra004256	0.107417
Bra013846	Bra006702	0.10738
Bra028814	Bra010941	0.107358
Bra014858	Bra029702	0.107326
Bra011313	Bra010941	0.107267
Bra014858	Bra026287	0.107062
Bra013846	Bra034084	0.106871
Bra024458	Bra006481	0.106854
Bra031125	Bra010941	0.106791
Bra040286	Bra029784	0.106668
Bra011477	Bra037714	0.106668
Bra019652	Bra006481	0.106631
Bra039730	Bra023970	0.10631
Bra008508	Bra002547	0.106253
Bra005784	Bra026399	0.106232
Bra034084	Bra006076	0.105941
Bra000643	Bra031125	0.105631
Bra032721	Bra037714	0.105509
Bra028814	Bra014187	0.105286
Bra032721	Bra019529	0.105242
Bra008508	Bra019652	0.105133
Bra011477	Bra036618	0.105103
Bra007701	Bra001213	0.104989
Bra007519	Bra031125	0.104947
Bra003498	Bra029784	0.104585
Bra036618	Bra031125	0.104571
Bra004528	Bra003498	0.104367
Bra026455	Bra011313	0.104364
Bra006481	Bra031178	0.104123
Bra029784	Bra021724	0.103831
Bra011313	Bra031125	0.103726
Bra021724	Bra010941	0.103609
Bra004528	Bra006481	0.103448
Bra031125	Bra023970	0.103363
Bra032721	Bra011313	0.10331
Bra026287	Bra028814	0.103218
Bra034084	Bra037838	0.10312
Bra007519	Bra026455	0.103104
Bra004256	Bra019529	0.102902
Bra008508	Bra006702	0.102889
Bra007519	Bra036676	0.102812
Bra019652	Bra001276	0.102798
Bra004528	Bra036618	0.102779
Bra037714	Bra026399	0.102688
Bra040286	Bra007701	0.102532
Bra007519	Bra021724	0.102518
Bra019652	Bra039730	0.102257
Bra008508	Bra008283	0.101996
Bra032129	Bra039730	0.101989
Bra020305	Bra004256	0.101891
Bra036676	Bra031125	0.101836
Bra004256	Bra026774	0.101605
Bra004528	Bra007701	0.101572
Bra007519	Bra001658	0.101471
Bra013846	Bra000450	0.101352
Bra032129	Bra006076	0.101347
Bra007519	Bra011313	0.10123
Bra009947	Bra031125	0.101049
Bra034084	Bra032033	0.101047
Bra006481	Bra001658	0.100999
Bra036618	Bra031178	0.100996
Bra003498	Bra001276	0.100945
Bra007519	Bra007677	0.10093
Bra009947	Bra019652	0.100885
Bra037714	Bra019529	0.100852
Bra005784	Bra024231	0.100778
Bra020305	Bra003498	0.100482
Bra014858	Bra012695	0.100468
Bra014858	Bra011477	0.100339
Bra037714	Bra031125	0.100142

## Sheet: red
fromNode	toNode	weight
Bra010550	Bra008234	0.221106
Bra008234	Bra022292	0.20939
Bra027192	Bra010760	0.203711
Bra034777	Bra008234	0.201467
Bra036720	Bra008234	0.190054
Bra010953	Bra040178	0.1887
Bra008234	Bra024433	0.180962
Bra010953	Bra016411	0.180015
Bra040178	Bra036910	0.179382
Bra010953	Bra009317	0.177556
Bra008234	Bra039688	0.17666
Bra013617	Bra015904	0.175611
Bra010953	Bra036910	0.173398
Bra001852	Bra029933	0.172196
Bra010953	Bra017290	0.169043
Bra033875	Bra010760	0.168985
Bra000458	Bra017290	0.168133
Bra013617	Bra039688	0.166823
Bra028091	Bra008234	0.165446
Bra024117	Bra008234	0.165173
Bra034777	Bra022292	0.163439
Bra004126	Bra010953	0.161856
Bra009317	Bra016411	0.161816
Bra033875	Bra027192	0.161168
Bra010550	Bra022292	0.161061
Bra036709	Bra004400	0.160939
Bra010953	Bra040600	0.160131
Bra010953	Bra037755	0.160023
Bra013617	Bra036495	0.159889
Bra010953	Bra015904	0.159321
Bra006783	Bra013617	0.159307
Bra000458	Bra039666	0.15913
Bra010953	Bra006529	0.15887
Bra040178	Bra017446	0.158843
Bra010953	Bra025505	0.158175
Bra022769	Bra008234	0.158006
Bra000458	Bra006529	0.157122
Bra000458	Bra003059	0.156285
Bra010953	Bra006783	0.155874
Bra001428	Bra029662	0.15543
Bra008234	Bra033286	0.155089
Bra000458	Bra025505	0.154788
Bra028761	Bra016624	0.154621
Bra032366	Bra008234	0.15433
Bra010760	Bra003590	0.154311
Bra036709	Bra029662	0.15431
Bra010953	Bra017446	0.154287
Bra031590	Bra001028	0.154244
Bra006227	Bra024418	0.154194
Bra037958	Bra008234	0.153646
Bra037958	Bra013617	0.153422
Bra027192	Bra036709	0.153394
Bra031083	Bra040674	0.153169
Bra011812	Bra010760	0.153151
Bra000458	Bra040178	0.152814
Bra013617	Bra036044	0.152631
Bra008234	Bra025733	0.152581
Bra010953	Bra003059	0.152487
Bra010953	Bra000458	0.152118
Bra001637	Bra016411	0.151965
Bra040178	Bra016411	0.151877
Bra005673	Bra008234	0.151788
Bra039666	Bra018043	0.151734
Bra010953	Bra001257	0.151698
Bra008234	Bra036495	0.151679
Bra029933	Bra024935	0.151132
Bra010550	Bra036720	0.151058
Bra010550	Bra013617	0.150882
Bra006783	Bra015904	0.150867
Bra000458	Bra015904	0.150302
Bra033520	Bra008234	0.149847
Bra004126	Bra016411	0.14979
Bra027192	Bra011812	0.149768
Bra033875	Bra036709	0.14973
Bra040178	Bra025505	0.14947
Bra010953	Bra022618	0.149379
Bra010953	Bra018043	0.149275
Bra001852	Bra000638	0.14873
Bra009317	Bra006783	0.148566
Bra008234	Bra015904	0.148492
Bra001637	Bra010953	0.148305
Bra016624	Bra022292	0.148216
Bra016411	Bra006783	0.147881
Bra000458	Bra018043	0.147437
Bra017290	Bra006529	0.147126
Bra004126	Bra006783	0.14706
Bra032265	Bra040178	0.146994
Bra001428	Bra036489	0.146994
Bra010760	Bra036709	0.1463
Bra036709	Bra016884	0.145859
Bra040178	Bra015904	0.145472
Bra000458	Bra037755	0.145015
Bra010953	Bra013561	0.144919
Bra031083	Bra008234	0.144902
Bra031590	Bra016624	0.144649
Bra040674	Bra022292	0.144619
Bra009695	Bra018043	0.144424
Bra039666	Bra009695	0.144325
Bra013617	Bra008382	0.144079
Bra025889	Bra008234	0.14399
Bra016411	Bra015904	0.143964
Bra024140	Bra018043	0.143794
Bra001852	Bra024935	0.143745
Bra010953	Bra039666	0.143691
Bra010550	Bra039688	0.14309
Bra040178	Bra017290	0.14271
Bra008234	Bra040674	0.142687
Bra033875	Bra011812	0.142387
Bra035649	Bra040674	0.141878
Bra027192	Bra001428	0.141855
Bra003155	Bra036489	0.14183
Bra008234	Bra001057	0.141723
Bra008234	Bra001460	0.141694
Bra036709	Bra001428	0.141554
Bra039688	Bra015904	0.141191
Bra008234	Bra008257	0.141043
Bra036720	Bra013617	0.140992
Bra031590	Bra003155	0.140809
Bra024418	Bra019433	0.140674
Bra000458	Bra014119	0.140557
Bra013617	Bra014119	0.140534
Bra000458	Bra016411	0.140497
Bra016411	Bra013617	0.140443
Bra001852	Bra009149	0.140362
Bra013617	Bra008234	0.14008
Bra025505	Bra017290	0.139988
Bra000458	Bra013561	0.139654
Bra008234	Bra023435	0.139646
Bra036910	Bra016411	0.13956
Bra017290	Bra015904	0.13955
Bra032265	Bra010953	0.139535
Bra010760	Bra040018	0.139505
Bra025505	Bra018043	0.139486
Bra024620	Bra021678	0.139314
Bra016624	Bra040674	0.139124
Bra016411	Bra024433	0.139063
Bra024117	Bra022292	0.138552
Bra001852	Bra028761	0.138514
Bra040178	Bra009317	0.13843
Bra010760	Bra004400	0.138421
Bra008234	Bra032531	0.138362
Bra004126	Bra013617	0.138264
Bra008234	Bra016624	0.1382
Bra003059	Bra017290	0.138154
Bra000458	Bra036044	0.138145
Bra032265	Bra008234	0.137794
Bra001257	Bra006227	0.137608
Bra028761	Bra008234	0.137521
Bra027192	Bra004400	0.137471
Bra000458	Bra006783	0.137459
Bra005673	Bra013617	0.137367
Bra010953	Bra001415	0.13718
Bra036709	Bra003158	0.137057
Bra003155	Bra001028	0.136963
Bra004126	Bra017290	0.136757
Bra004126	Bra000458	0.136748
Bra009317	Bra013617	0.13672
Bra039688	Bra024433	0.136707
Bra010953	Bra000895	0.136487
Bra003155	Bra001428	0.136461
Bra006227	Bra019433	0.136289
Bra027192	Bra003590	0.136194
Bra003158	Bra004400	0.136192
Bra003781	Bra008234	0.136063
Bra010953	Bra018618	0.13603
Bra036709	Bra022143	0.135956
Bra013617	Bra023502	0.135877
Bra019250	Bra006783	0.135873
Bra033875	Bra001428	0.135816
Bra001257	Bra039666	0.135722
Bra000458	Bra001257	0.135509
Bra032265	Bra016411	0.13549
Bra009317	Bra017290	0.135349
Bra010953	Bra014119	0.13533
Bra000458	Bra009317	0.135308
Bra013617	Bra017290	0.135248
Bra001257	Bra017446	0.135137
Bra024935	Bra000638	0.134839
Bra040178	Bra018043	0.134708
Bra040178	Bra001257	0.134631
Bra016624	Bra032531	0.134537
Bra013617	Bra003781	0.13449
Bra032366	Bra033520	0.134245
Bra039666	Bra006227	0.134036
Bra006783	Bra036044	0.133952
Bra003781	Bra015904	0.133874
Bra034777	Bra010550	0.133734
Bra031083	Bra016624	0.133404
Bra034777	Bra040674	0.133301
Bra001257	Bra025505	0.133206
Bra031590	Bra040674	0.133195
Bra031590	Bra028761	0.133173
Bra010953	Bra024140	0.13315
Bra027192	Bra016884	0.133144
Bra001257	Bra009695	0.133133
Bra010550	Bra040674	0.133101
Bra033603	Bra029325	0.133094
Bra036720	Bra022292	0.132984
Bra010760	Bra001428	0.132682
Bra024620	Bra005988	0.132667
Bra009695	Bra025972	0.132626
Bra004126	Bra019250	0.132487
Bra040178	Bra022618	0.132371
Bra010550	Bra015904	0.132258
Bra000458	Bra040600	0.132249
Bra016411	Bra017290	0.132089
Bra010953	Bra039688	0.132001
Bra033520	Bra001057	0.131938
Bra008234	Bra018439	0.131915
Bra001852	Bra031590	0.13185
Bra004400	Bra001428	0.131839
Bra024935	Bra000269	0.13182
Bra001460	Bra003302	0.131762
Bra001637	Bra040178	0.131668
Bra036044	Bra015904	0.131634
Bra016411	Bra022618	0.131587
Bra035649	Bra016624	0.131441
Bra010295	Bra033603	0.131384
Bra032366	Bra013617	0.131345
Bra000458	Bra036910	0.131307
Bra028091	Bra022292	0.131249
Bra033875	Bra016884	0.13119
Bra001257	Bra018043	0.131048
Bra034777	Bra016624	0.130958
Bra016411	Bra039688	0.130905
Bra028761	Bra040674	0.130902
Bra036910	Bra017446	0.130827
Bra031590	Bra036489	0.130681
Bra017290	Bra013561	0.130656
Bra001257	Bra037755	0.130583
Bra003059	Bra013561	0.130312
Bra035649	Bra008234	0.130217
Bra000458	Bra009695	0.130159
Bra025733	Bra016624	0.130132
Bra037755	Bra018618	0.130114
Bra000458	Bra013617	0.130056
Bra036910	Bra015904	0.130054
Bra006783	Bra017290	0.129985
Bra018043	Bra015904	0.129968
Bra040178	Bra039666	0.129918
Bra031590	Bra001428	0.129882
Bra025505	Bra015904	0.129851
Bra031590	Bra031083	0.129816
Bra031590	Bra024935	0.129718
Bra039688	Bra022292	0.1297
Bra006783	Bra039688	0.129477
Bra036910	Bra017290	0.129371
Bra036709	Bra036489	0.129367
Bra039666	Bra017290	0.129364
Bra010760	Bra033603	0.129341
Bra004400	Bra016884	0.12917
Bra038439	Bra001428	0.129125
Bra036495	Bra015904	0.129097
Bra001428	Bra016884	0.129081
Bra036495	Bra039688	0.129075
Bra010953	Bra025972	0.128834
Bra001428	Bra029020	0.12871
Bra040178	Bra013617	0.128592
Bra001428	Bra015345	0.128574
Bra000458	Bra008382	0.128571
Bra000895	Bra016411	0.128453
Bra027192	Bra040018	0.128421
Bra010953	Bra036044	0.128188
Bra024935	Bra028761	0.128136
Bra009149	Bra024935	0.12809
Bra013617	Bra006529	0.128074
Bra001852	Bra020043	0.12786
Bra004126	Bra005728	0.127676
Bra004166	Bra013617	0.127542
Bra010760	Bra010295	0.127428
Bra032265	Bra015904	0.127331
Bra001257	Bra025972	0.12724
Bra001637	Bra024433	0.127221
Bra036709	Bra009579	0.127207
Bra032265	Bra039688	0.127164
Bra000230	Bra005728	0.126928
Bra023567	Bra001428	0.12682
Bra010760	Bra016884	0.1268
Bra010550	Bra016624	0.126712
Bra010295	Bra034928	0.126711
Bra005097	Bra024418	0.12668
Bra006227	Bra005097	0.126497
Bra001852	Bra022292	0.126465
Bra006783	Bra036495	0.12646
Bra010953	Bra013617	0.126332
Bra040178	Bra006529	0.126306
Bra033875	Bra004400	0.126203
Bra001852	Bra001028	0.12614
Bra000458	Bra000895	0.12612
Bra040178	Bra024433	0.126034
Bra014119	Bra017290	0.126031
Bra036720	Bra040674	0.125919
Bra008234	Bra036044	0.125871
Bra001257	Bra018618	0.125679
Bra006783	Bra008234	0.125647
Bra036720	Bra039688	0.125585
Bra010953	Bra032366	0.125556
Bra013617	Bra022292	0.125552
Bra008382	Bra008234	0.125516
Bra001852	Bra008234	0.125506
Bra036044	Bra017290	0.12537
Bra033520	Bra013617	0.12535
Bra040178	Bra037755	0.125346
Bra040178	Bra006783	0.125345
Bra018618	Bra025972	0.125303
Bra037958	Bra032531	0.125138
Bra036709	Bra015345	0.125119
Bra017446	Bra018043	0.124997
Bra022143	Bra001428	0.124946
Bra025733	Bra022292	0.124847
Bra033875	Bra020111	0.124811
Bra031563	Bra008234	0.124701
Bra000458	Bra022618	0.12454
Bra040600	Bra017290	0.124476
Bra000458	Bra024140	0.124447
Bra037958	Bra039688	0.124357
Bra027192	Bra020111	0.124165
Bra013617	Bra018043	0.124107
Bra000458	Bra004166	0.12408
Bra001852	Bra022769	0.124021
Bra004126	Bra009317	0.123946
Bra037958	Bra015904	0.123898
Bra000895	Bra013617	0.123838
Bra018006	Bra001460	0.123809
Bra016411	Bra014119	0.123775
Bra010953	Bra009695	0.123744
Bra001852	Bra009347	0.123667
Bra010953	Bra024433	0.123649
Bra022769	Bra040674	0.12362
Bra032265	Bra013617	0.123566
Bra037755	Bra025972	0.123537
Bra008234	Bra009347	0.123481
Bra003158	Bra001428	0.12347
Bra037755	Bra017290	0.12346
Bra003059	Bra037755	0.123427
Bra000458	Bra001415	0.123422
Bra010760	Bra020111	0.123421
Bra006227	Bra018043	0.123405
Bra004166	Bra017290	0.123313
Bra010953	Bra004166	0.12307
Bra000458	Bra039688	0.123069
Bra028761	Bra022292	0.123065
Bra024136	Bra005887	0.123047
Bra016411	Bra006529	0.123008
Bra036910	Bra018043	0.122998
Bra004400	Bra033603	0.122889
Bra013616	Bra001428	0.122773
Bra025505	Bra013617	0.122763
Bra029933	Bra009149	0.122707
Bra002216	Bra039785	0.122663
Bra000230	Bra019250	0.122584
Bra004126	Bra003059	0.122409
Bra003158	Bra029662	0.12237
Bra036709	Bra010295	0.122308
Bra003781	Bra039688	0.122174
Bra006783	Bra014119	0.122052
Bra032366	Bra006783	0.122019
Bra027192	Bra009579	0.12192
Bra024140	Bra025972	0.121845
Bra027192	Bra033603	0.121836
Bra009317	Bra015904	0.121693
Bra022769	Bra016624	0.121687
Bra001852	Bra033520	0.121678
Bra001852	Bra040674	0.121568
Bra032366	Bra016411	0.121404
Bra000458	Bra017446	0.121377
Bra025889	Bra022292	0.121368
Bra031590	Bra005731	0.121323
Bra008234	Bra003302	0.121265
Bra005097	Bra018043	0.121116
Bra013617	Bra024433	0.121036
Bra009695	Bra005097	0.121029
Bra040178	Bra024140	0.12091
Bra018043	Bra017290	0.120903
Bra000230	Bra037089	0.120809
Bra040178	Bra039688	0.120767
Bra024136	Bra019250	0.120712
Bra001257	Bra036910	0.12057
Bra001028	Bra016624	0.120452
Bra010295	Bra029325	0.120396
Bra003059	Bra006529	0.120291
Bra001852	Bra016624	0.120274
Bra022292	Bra024433	0.120165
Bra006783	Bra022618	0.120028
Bra039666	Bra025972	0.119904
Bra031083	Bra022292	0.119896
Bra017857	Bra001428	0.119885
Bra006783	Bra005728	0.11984
Bra037461	Bra005887	0.119774
Bra037958	Bra022292	0.11967
Bra039666	Bra005097	0.119537
Bra036709	Bra029020	0.119528
Bra010760	Bra034928	0.119333
Bra013617	Bra020006	0.118948
Bra033875	Bra010295	0.118908
Bra016411	Bra003059	0.118817
Bra003155	Bra029662	0.118729
Bra008382	Bra015904	0.118708
Bra004126	Bra015904	0.118676
Bra036720	Bra024433	0.118631
Bra008234	Bra000638	0.118538
Bra034777	Bra039688	0.118421
Bra001852	Bra018006	0.118358
Bra000895	Bra006783	0.118338
Bra013617	Bra032531	0.118258
Bra001852	Bra000269	0.118201
Bra000458	Bra018618	0.118199
Bra008382	Bra018043	0.118198
Bra020043	Bra008234	0.118167
Bra032366	Bra024433	0.118162
Bra027192	Bra010295	0.118113
Bra024136	Bra005728	0.118066
Bra004126	Bra000230	0.118018
Bra001257	Bra024140	0.117878
Bra029662	Bra036489	0.117875
Bra006783	Bra006529	0.117852
Bra010977	Bra038164	0.11784
Bra001028	Bra040674	0.11775
Bra000458	Bra032366	0.117691
Bra024935	Bra005731	0.117578
Bra016411	Bra018043	0.11756
Bra000458	Bra025972	0.117543
Bra035649	Bra032531	0.117444
Bra005097	Bra025972	0.117433
Bra010550	Bra033520	0.117423
Bra034777	Bra036720	0.117386
Bra024117	Bra016624	0.117365
Bra024136	Bra037461	0.117268
Bra032531	Bra022292	0.117264
Bra024117	Bra040674	0.117258
Bra001637	Bra008234	0.11723
Bra040178	Bra040600	0.117201
Bra040674	Bra018439	0.117194
Bra010550	Bra006783	0.11708
Bra004166	Bra014119	0.117021
Bra001852	Bra031083	0.117018
Bra032366	Bra015904	0.116851
Bra000230	Bra017290	0.116814
Bra018043	Bra022618	0.116711
Bra013617	Bra013561	0.116667
Bra001460	Bra000638	0.116653
Bra006783	Bra027719	0.116642
Bra010760	Bra009579	0.116603
Bra018043	Bra025972	0.11659
Bra027192	Bra003155	0.116493
Bra008234	Bra018813	0.116477
Bra032366	Bra017290	0.116251
Bra029933	Bra031590	0.11622
Bra000458	Bra020006	0.116157
Bra005673	Bra010550	0.116137
Bra005613	Bra024247	0.116067
Bra001257	Bra005097	0.115873
Bra013617	Bra022618	0.115872
Bra015904	Bra024433	0.115866
Bra001852	Bra003155	0.115829
Bra002645	Bra040109	0.115809
Bra032265	Bra036910	0.11579
Bra036910	Bra013617	0.115725
Bra037461	Bra007547	0.115718
Bra024136	Bra030035	0.115694
Bra001257	Bra001415	0.115676
Bra001852	Bra033286	0.115669
Bra000230	Bra033004	0.115659
Bra033520	Bra020043	0.115657
Bra032265	Bra006783	0.115586
Bra033520	Bra023435	0.115554
Bra016411	Bra037755	0.115546
Bra031590	Bra022769	0.115478
Bra005673	Bra037958	0.115435
Bra016411	Bra013561	0.115396
Bra010953	Bra008382	0.115138
Bra001028	Bra001428	0.115093
Bra024620	Bra012952	0.115079
Bra033248	Bra001460	0.115072
Bra003751	Bra012952	0.11507
Bra035649	Bra022292	0.114969
Bra040674	Bra032531	0.114919
Bra010295	Bra004400	0.11491
Bra004126	Bra040178	0.114876
Bra034394	Bra013617	0.114826
Bra033520	Bra033286	0.114605
Bra010760	Bra038439	0.114597
Bra036709	Bra017857	0.114597
Bra024620	Bra010129	0.114566
Bra012325	Bra008234	0.114564
Bra037962	Bra024418	0.114555
Bra005673	Bra022292	0.114506
Bra009695	Bra018618	0.114406
Bra022292	Bra033286	0.114378
Bra037755	Bra018043	0.114336
Bra033520	Bra022769	0.114283
Bra001257	Bra017290	0.114264
Bra031590	Bra025733	0.114233
Bra033875	Bra003158	0.114166
Bra029933	Bra033520	0.114142
Bra024136	Bra000230	0.114132
Bra033875	Bra033603	0.113995
Bra003155	Bra013616	0.113986
Bra024935	Bra009347	0.113975
Bra001852	Bra028091	0.113953
Bra004166	Bra015904	0.113905
Bra033875	Bra040018	0.113818
Bra033520	Bra036720	0.113772
Bra006686	Bra010953	0.113668
Bra037958	Bra001460	0.113583
Bra033875	Bra009579	0.113564
Bra022769	Bra012325	0.11353
Bra036709	Bra023567	0.11353
Bra013617	Bra006896	0.113475
Bra011593	Bra040109	0.113391
Bra005673	Bra039688	0.113381
Bra013617	Bra003059	0.113364
Bra014119	Bra015904	0.113292
Bra003781	Bra008382	0.11322
Bra036720	Bra016624	0.11318
Bra001415	Bra018618	0.11314
Bra040178	Bra009695	0.113125
Bra036044	Bra039688	0.113087
Bra036720	Bra015904	0.113011
Bra024620	Bra021127	0.112973
Bra012325	Bra040674	0.11282
Bra039666	Bra024418	0.112815
Bra004126	Bra013561	0.112812
Bra040600	Bra016411	0.112794
Bra005887	Bra013617	0.112775
Bra022618	Bra017290	0.112764
Bra006783	Bra024433	0.112757
Bra031590	Bra024120	0.112741
Bra031590	Bra012325	0.112704
Bra016411	Bra036044	0.112657
Bra039666	Bra017446	0.11264
Bra003781	Bra018043	0.112492
Bra033520	Bra024433	0.112482
Bra003751	Bra011132	0.11246
Bra008257	Bra022292	0.112459
Bra034777	Bra001852	0.112451
Bra032366	Bra039688	0.112381
Bra003155	Bra038439	0.112353
Bra022618	Bra015904	0.112349
Bra006686	Bra025972	0.112342
Bra000458	Bra005097	0.112255
Bra033845	Bra030025	0.11216
Bra025505	Bra016411	0.112149
Bra017446	Bra017290	0.112097
Bra010550	Bra012325	0.112086
Bra040178	Bra032366	0.111975
Bra031590	Bra022292	0.111971
Bra036709	Bra013616	0.111879
Bra006783	Bra006143	0.111835
Bra024935	Bra016624	0.111799
Bra004166	Bra006783	0.111661
Bra040178	Bra003059	0.111602
Bra028091	Bra039688	0.111536
Bra037461	Bra006896	0.111497
Bra005728	Bra017290	0.111489
Bra006783	Bra030035	0.111437
Bra010953	Bra005728	0.111399
Bra011812	Bra038439	0.111359
Bra010953	Bra023575	0.11114
Bra000895	Bra017290	0.111124
Bra015904	Bra006529	0.111118
Bra003158	Bra016884	0.111076
Bra035649	Bra024620	0.111047
Bra020006	Bra017290	0.110992
Bra009579	Bra001428	0.110965
Bra022292	Bra018439	0.11089
Bra027192	Bra038439	0.110861
Bra013617	Bra001460	0.110841
Bra031590	Bra013616	0.11072
Bra027688	Bra017290	0.110681
Bra040674	Bra012952	0.110657
Bra013617	Bra023435	0.110595
Bra000230	Bra006783	0.110568
Bra000458	Bra000230	0.110507
Bra028091	Bra013617	0.110478
Bra008382	Bra039688	0.110477
Bra006056	Bra012325	0.110462
Bra010295	Bra020111	0.110429
Bra028091	Bra040674	0.110347
Bra010760	Bra023567	0.110289
Bra013617	Bra030035	0.110235
Bra008234	Bra012952	0.110227
Bra005673	Bra036720	0.110167
Bra033520	Bra039688	0.110154
Bra040178	Bra036044	0.110133
Bra001852	Bra001460	0.110009
Bra022769	Bra022292	0.10993
Bra034777	Bra031590	0.109855
Bra036709	Bra019763	0.109851
Bra036709	Bra038439	0.109836
Bra025733	Bra040674	0.109823
Bra037958	Bra016624	0.109782
Bra039666	Bra003059	0.109776
Bra024417	Bra024418	0.109759
Bra016411	Bra008234	0.109537
Bra013617	Bra034206	0.1095
Bra006686	Bra000458	0.109409
Bra003158	Bra015345	0.109392
Bra006227	Bra025972	0.109238
Bra031590	Bra038689	0.109227
Bra032265	Bra000458	0.109223
Bra010550	Bra024433	0.109208
Bra022769	Bra013617	0.109156
Bra005887	Bra006896	0.109124
Bra039688	Bra017290	0.109019
Bra016411	Bra017446	0.109017
Bra036910	Bra006783	0.109008
Bra027192	Bra036489	0.108973
Bra037962	Bra019433	0.108972
Bra019763	Bra036489	0.108956
Bra036720	Bra022769	0.108935
Bra012157	Bra024626	0.108864
Bra008645	Bra018043	0.108786
Bra033875	Bra034928	0.108773
Bra001028	Bra008234	0.108703
Bra001852	Bra010550	0.108669
Bra036720	Bra012325	0.108633
Bra035649	Bra018439	0.108616
Bra019250	Bra005728	0.10861
Bra013617	Bra001057	0.108582
Bra024935	Bra040674	0.108546
Bra001637	Bra006783	0.108532
Bra005673	Bra016624	0.108511
Bra032366	Bra001057	0.10848
Bra012325	Bra016624	0.108465
Bra001460	Bra022292	0.108417
Bra033520	Bra022292	0.108404
Bra036910	Bra039688	0.10832
Bra024935	Bra001028	0.108317
Bra040178	Bra023575	0.108283
Bra015345	Bra036489	0.108271
Bra037958	Bra008382	0.108254
Bra039666	Bra000789	0.108241
Bra013617	Bra005728	0.108205
Bra001852	Bra001057	0.108196
Bra018043	Bra036044	0.108195
Bra027192	Bra034928	0.108122
Bra018006	Bra000638	0.108032
Bra027192	Bra023567	0.108029
Bra039666	Bra025505	0.107972
Bra031590	Bra029662	0.107922
Bra010953	Bra031413	0.107871
Bra003059	Bra014119	0.107792
Bra040178	Bra025972	0.107684
Bra008645	Bra010953	0.107659
Bra010760	Bra003155	0.107418
Bra032265	Bra017290	0.107399
Bra005887	Bra006783	0.107318
Bra025505	Bra006783	0.107166
Bra010295	Bra016884	0.107163
Bra040178	Bra003781	0.107135
Bra000789	Bra017446	0.107083
Bra034777	Bra013617	0.107013
Bra033248	Bra008234	0.107011
Bra010953	Bra000230	0.106923
Bra003155	Bra016624	0.106922
Bra009695	Bra017290	0.106902
Bra040178	Bra013561	0.106715
Bra000458	Bra003781	0.106668
Bra013617	Bra033286	0.106585
Bra008234	Bra014119	0.106569
Bra024140	Bra015904	0.106556
Bra033875	Bra038439	0.106497
Bra039688	Bra033286	0.106472
Bra036495	Bra022292	0.106459
Bra036910	Bra008234	0.106448
Bra019250	Bra013617	0.106408
Bra039666	Bra013617	0.106392
Bra040178	Bra018618	0.106351
Bra012325	Bra006896	0.106225
Bra001852	Bra023435	0.106215
Bra016624	Bra033286	0.106158
Bra000230	Bra013617	0.106146
Bra000458	Bra031413	0.106114
Bra034614	Bra029797	0.106078
Bra037461	Bra033054	0.10604
Bra013616	Bra036489	0.106023
Bra009317	Bra003059	0.106001
Bra033520	Bra028091	0.106
Bra009695	Bra037755	0.105994
Bra024136	Bra006143	0.105938
Bra016411	Bra004166	0.10592
Bra012952	Bra011132	0.105907
Bra012157	Bra018043	0.105869
Bra008257	Bra018439	0.105868
Bra013617	Bra024140	0.105865
Bra000230	Bra006143	0.105825
Bra031590	Bra012091	0.10582
Bra000230	Bra033054	0.105783
Bra001852	Bra036720	0.105774
Bra012325	Bra024120	0.105749
Bra004126	Bra014119	0.105734
Bra001852	Bra005731	0.1057
Bra040109	Bra023502	0.105678
Bra003059	Bra018043	0.105602
Bra001852	Bra003751	0.10559
Bra003158	Bra029020	0.105541
Bra039666	Bra024140	0.105521
Bra006056	Bra008234	0.105511
Bra036709	Bra003155	0.105202
Bra033520	Bra006783	0.105123
Bra006783	Bra003059	0.10505
Bra001637	Bra039688	0.105021
Bra006783	Bra013561	0.10495
Bra032265	Bra018043	0.104887
Bra033054	Bra020006	0.104818
Bra023567	Bra003155	0.104803
Bra024136	Bra006783	0.104794
Bra008382	Bra023502	0.104789
Bra012325	Bra022292	0.104736
Bra001428	Bra030623	0.104721
Bra029933	Bra008234	0.104704
Bra040178	Bra008382	0.104701
Bra023435	Bra039688	0.104603
Bra003155	Bra012325	0.104555
Bra037461	Bra000230	0.104489
Bra032366	Bra010550	0.104458
Bra009317	Bra039688	0.104411
Bra020043	Bra024935	0.104324
Bra018043	Bra039688	0.104308
Bra009513	Bra008234	0.104279
Bra039666	Bra037755	0.104263
Bra034777	Bra012325	0.104243
Bra001460	Bra018439	0.104224
Bra024117	Bra039688	0.104221
Bra001415	Bra025972	0.104216
Bra003751	Bra018439	0.104143
Bra006783	Bra018043	0.104141
Bra006686	Bra018618	0.104133
Bra000458	Bra027688	0.103997
Bra025889	Bra039688	0.103993
Bra040178	Bra008234	0.103963
Bra018006	Bra008234	0.103947
Bra000458	Bra030035	0.103941
Bra001257	Bra024418	0.10392
Bra010550	Bra025733	0.103828
Bra037461	Bra013617	0.103729
Bra016624	Bra012952	0.103721
Bra004126	Bra004166	0.103715
Bra001637	Bra013617	0.103659
Bra008234	Bra034206	0.103603
Bra031083	Bra012325	0.103583
Bra033248	Bra008382	0.103579
Bra016411	Bra005728	0.103533
Bra039666	Bra016411	0.103436
Bra000458	Bra024626	0.103424
Bra016624	Bra018439	0.103419
Bra040674	Bra033286	0.103379
Bra027192	Bra003158	0.103359
Bra025505	Bra025972	0.103347
Bra033248	Bra013617	0.103298
Bra024136	Bra006896	0.103281
Bra001852	Bra012325	0.10316
Bra016411	Bra024140	0.10314
Bra034777	Bra033520	0.103125
Bra016411	Bra023575	0.103109
Bra037461	Bra019250	0.103079
Bra037461	Bra033004	0.103077
Bra016411	Bra027719	0.103067
Bra033520	Bra036044	0.103034
Bra010953	Bra027719	0.102975
Bra039666	Bra018618	0.102938
Bra000458	Bra005728	0.102936
Bra020043	Bra023435	0.102928
Bra029797	Bra003890	0.102875
Bra024136	Bra033004	0.102859
Bra024136	Bra013617	0.102855
Bra000230	Bra003059	0.102829
Bra023206	Bra000458	0.102827
Bra001257	Bra016411	0.102778
Bra033875	Bra036489	0.102647
Bra036709	Bra033603	0.102644
Bra011812	Bra001428	0.102631
Bra024140	Bra017290	0.102595
Bra024620	Bra018439	0.102585
Bra017857	Bra038439	0.102579
Bra006783	Bra020006	0.102539
Bra016411	Bra014751	0.102518
Bra001852	Bra005673	0.102472
Bra000458	Bra033520	0.102424
Bra001428	Bra019763	0.10236
Bra037461	Bra027153	0.102346
Bra001415	Bra017290	0.102319
Bra000458	Bra033248	0.102312
Bra005673	Bra034394	0.102277
Bra000895	Bra014119	0.102272
Bra001257	Bra003059	0.102256
Bra036720	Bra006783	0.102255
Bra033875	Bra003155	0.102228
Bra015904	Bra013561	0.102102
Bra010953	Bra023435	0.102094
Bra033520	Bra000638	0.102077
Bra021678	Bra005988	0.102068
Bra010953	Bra020006	0.10205
Bra003155	Bra019763	0.101953
Bra001428	Bra038689	0.101938
Bra018006	Bra024935	0.101897
Bra036709	Bra020111	0.101885
Bra039666	Bra015904	0.101865
Bra001852	Bra003302	0.101845
Bra040178	Bra014119	0.10184
Bra036720	Bra028091	0.101791
Bra001415	Bra037755	0.101763
Bra027594	Bra008234	0.101747
Bra008234	Bra023502	0.101714
Bra023435	Bra024433	0.101615
Bra011593	Bra023502	0.101593
Bra031590	Bra001062	0.10153
Bra010953	Bra027688	0.101525
Bra007547	Bra006896	0.10149
Bra005097	Bra019433	0.101487
Bra017290	Bra030035	0.10145
Bra009317	Bra008234	0.10138
Bra005673	Bra033520	0.101306
Bra033520	Bra015904	0.101297
Bra024117	Bra033286	0.101265
Bra000458	Bra006227	0.101177
Bra003155	Bra040674	0.101116
Bra003155	Bra031083	0.101092
Bra005887	Bra000230	0.101045
Bra013617	Bra025733	0.101028
Bra018043	Bra018618	0.100918
Bra003155	Bra022769	0.1009
Bra032366	Bra036720	0.100891
Bra000458	Bra034206	0.100833
Bra001028	Bra036489	0.100821
Bra001028	Bra031083	0.100809
Bra023567	Bra038439	0.100809
Bra006896	Bra028287	0.100635
Bra024935	Bra020698	0.100625
Bra012325	Bra033286	0.10059
Bra040600	Bra003059	0.100556
Bra028091	Bra016624	0.100474
Bra038439	Bra016884	0.100426
Bra010953	Bra033520	0.1004
Bra014119	Bra039688	0.100383
Bra040178	Bra001415	0.100375
Bra018813	Bra024433	0.100333
Bra034777	Bra031083	0.100317
Bra037461	Bra005728	0.100237
Bra010953	Bra036495	0.100193
Bra006686	Bra017290	0.100139
Bra004400	Bra009579	0.100134
Bra016411	Bra008382	0.100126
Bra003751	Bra008234	0.100105
Bra024935	Bra035839	0.10009
Bra001460	Bra040674	0.10008
Bra001852	Bra031563	0.100069

[truncated: 2 more sheets: turquoise, yellow]
