# Supplementary material for: Effects of Exogenous Ergothioneine on Brassica rapa Clubroot Development Revealed by Transcriptomic Analysis
Source: Int J Mol Sci. 2023 Mar 28;24(7):6380. doi: 10.3390/ijms24076380 (PMC10094275; doi:10.3390/ijms24076380)
Supplement: Supplementary file 1 [file ijms-24-06380-s001.zip › Table S5 RNA-seq and qRT-PCR.xlsx]

## Sheet: RNA-seq
Gene	Gene_ID	Pb4_10_1	Pb4_10_2	Pb4_10_3	Pb4_14_1	Pb4_14_2	Pb4_14_3	Pb4_19_1	Pb4_19_2	Pb4_19_3	Pb4_27_1	Pb4_27_2	Pb4_27_3	EPb_10_1	EPb_10_2	EPb_10_3	EPb_14_1	EPb_14_2	EPb_14_3	EPb_19_1	EPb_19_2	EPb_19_3	EPb_27_1	EPb_27_2	EPb_27_3	Chromosome	Start Site	End Site	Direction	Length	Name	GO	KEGG	EC	Description
PAL	Bra005221	466.278	398.134	324.358	351.604	622.614	634.668	240.872	244.615	225.149	233.609	288.191	278.808	249.834	436.545	338.143	720.356	695.33	397.994	307.703	297.122	246.739	298.313	228.367	217.336	A05	4098130	4100879	+	1116	Bra005221	GO:0009058;GO:0016211	K10775	[EC:4.3.1.24]	gi|674958747|emb|CDX74991.1| BnaA05g07370D [Brassica napus]
C4H	Bra021637	131.594	148.247	95.9743	115.235	266.127	213.476	101.116	89.6507	71.6826	65.7473	57.0294	82.9653	88.9413	105.767	108.377	288.225	233.334	171.409	106.13	109.407	101.389	72.9073	55.6528	50.1476	A04	13688684	13690602	-	1518	Bra021637	GO:0004497;GO:0005506;GO:0009055;GO:0020037	K00487	[EC:1.14.13.11]	gi|685300698|ref|XP_009141068.1| PREDICTED: trans-cinnamate 4-monooxygenase-like [Brassica rapa]
4CL	Bra030429	268.916	346.063	231.396	121.921	379.144	308.524	211.143	147.859	109.867	107.934	111.065	132.124	204.449	291.803	304.427	410.775	325.704	316.478	176.536	164.21	168.368	164.071	118.223	87.0871	A05	11246278	11249002	+	1659	Bra030429	GO:0003824;GO:0008152	K01904	[EC:6.2.1.12]	gi|685308420|ref|XP_009144890.1| PREDICTED: 4-coumarate--CoA ligase 1 [Brassica rapa]
CCOAOMT1	Bra034600	658.047	823.587	653.375	741.411	1302.94	1073.12	719.239	613.338	527.556	305.127	369.967	396.397	745.321	976.876	960.376	1364.49	959.612	962.508	642.268	658.699	748.658	450.419	335.834	267.802	A08	11803933	11805048	-	777	Bra034600	GO:0008171	K00588	[EC:2.1.1.104]	gi|685345169|ref|XP_009108759.1| PREDICTED: caffeoyl-CoA O-methyltransferase 1-like [Brassica rapa]
FLS	Bra018076	12.9292	16.1653	13.0347	17.8552	57.375	49.7496	23.1178	12.1613	14.657	9.8912	7.2973	9.28057	17.2206	17.6994	15.7651	58.8119	48.4451	28.5363	15.464	16.026	14.6847	13.2473	9.01773	6.97564	A06	9740252	9741348	+	918	Bra018076	GO:0016491	K05278	[EC:1.14.11.23]	gi|685319024|ref|XP_009149835.1| PREDICTED: flavonol synthase/flavanone 3-hydroxylase-like [Brassica rapa]
ANS	Bra034861	1.12211	1.2852	0.97667	0.544833	1.44144	1.81966	1.20164	0.0512063	0.513808	0	0	0	1.05235	2.58362	1.54983	2.76399	2.01781	1.76996	0.717239	0.989206	0.6819	0.536075	0	0.059073	A05	22498265	22500969	-	1218	Bra034861	GO:0016491	K05277	[EC:1.14.11.19]	gi|685312367|ref|XP_009146748.1| PREDICTED: leucoanthocyanidin dioxygenase [Brassica rapa]

## Sheet: PAL-qRT-PCR
Sample	Cq
Pb4-10 ACTIN	6.426
Pb4-10 ACTIN	6.35637
Pb4-10 ACTIN	6.31216
Pb4-10	22.333
Pb4-10	22.1975
Pb4-10	22.062
EPb-10 ACTIN	6.35012
EPb-10 ACTIN	6.30607
EPb-10 ACTIN	6.28933
EPb-10	22.9118
EPb-10	22.7244
EPb-10	22.9751
Pb4-14 ACTIN	5.98151
Pb4-14 ACTIN	5.96191
Pb4-14 ACTIN	5.9225
Pb4-14	21.5757
Pb4-14	21.6143
Pb4-14	21.653
EPb-14 ACTIN	6.89318
EPb-14 ACTIN	6.76306
EPb-14 ACTIN	6.60233
EPb-14	21.6373
EPb-14	21.636
EPb-14	21.6347
Pb4-19 ACTIN	6.3829
Pb4-19 ACTIN	6.22534
Pb4-19 ACTIN	6.24207
Pb4-19	23.2198
Pb4-19	23.3409
Pb4-19	23.0987
EPb-19 ACTIN	6.6058
EPb-19 ACTIN	6.64763
EPb-19 ACTIN	6.42077
EPb-19	23.1637
EPb-19	23.4563
EPb-19	23.4228
Pb4-27 ACTIN	5.68053
Pb4-27 ACTIN	5.6829
Pb4-27 ACTIN	5.68842
Pb4-27	21.8685
Pb4-27	21.8428
Pb4-27	21.7374
EPb-27 ACTIN	5.5182
EPb-27 ACTIN	5.31567
EPb-27 ACTIN	5.71711
EPb-27	21.9958
EPb-27	21.9247
EPb-27	21.8082

## Sheet: C4H-qRT-PCR
Sample	Cq
Pb4-10 ACTIN	6.426
Pb4-10 ACTIN	6.35637
Pb4-10 ACTIN	6.31216
Pb4-10	24.3829
Pb4-10	24.5185
Pb4-10	24.5035
EPb-10 ACTIN	6.35012
EPb-10 ACTIN	6.30607
EPb-10 ACTIN	6.28933
EPb-10	25.11
EPb-10	25.175
EPb-10	25.075
Pb4-14 ACTIN	5.98151
Pb4-14 ACTIN	5.96191
Pb4-14 ACTIN	5.9225
Pb4-14	23.3836
Pb4-14	23.2793
Pb4-14	23.3741
EPb-14 ACTIN	6.89318
EPb-14 ACTIN	6.76306
EPb-14 ACTIN	6.60233
EPb-14	23.6834
EPb-14	23.6554
EPb-14	23.9123
Pb4-19 ACTIN	6.3829
Pb4-19 ACTIN	6.22534
Pb4-19 ACTIN	6.24207
Pb4-19	25.1064
Pb4-19	25.0484
Pb4-19	24.9561
EPb-19 ACTIN	6.6058
EPb-19 ACTIN	6.64763
EPb-19 ACTIN	6.42077
EPb-19	24.606
EPb-19	25.024
EPb-19	24.7891
Pb4-27 ACTIN	5.68053
Pb4-27 ACTIN	5.6829
Pb4-27 ACTIN	5.68842
Pb4-27	26.9111
Pb4-27	26.4486
Pb4-27	26.3459
EPb-27 ACTIN	5.5182
EPb-27 ACTIN	5.31567
EPb-27 ACTIN	5.71711
EPb-27	25.179
EPb-27	25.0274
EPb-27	24.3677

## Sheet: 4CL-qRT-PCR
Sample	Cq
Pb4-10 ACTIN	6.426
Pb4-10 ACTIN	6.35637
Pb4-10 ACTIN	6.31216
Pb4-10	23.2764
Pb4-10	23.3514
Pb4-10	23.5358
EPb-10 ACTIN	6.35012
EPb-10 ACTIN	6.30607
EPb-10 ACTIN	6.28933
EPb-10	23.4824
EPb-10	23.6009
EPb-10	23.5211
Pb4-14 ACTIN	5.98151
Pb4-14 ACTIN	5.96191
Pb4-14 ACTIN	5.9225
Pb4-14	22.6575
Pb4-14	22.6564
Pb4-14	22.7837
EPb-14 ACTIN	6.89318
EPb-14 ACTIN	6.76306
EPb-14 ACTIN	6.60233
EPb-14	23.0013
EPb-14	22.9238
EPb-14	23.499
Pb4-19 ACTIN	6.3829
Pb4-19 ACTIN	6.22534
Pb4-19 ACTIN	6.24207
Pb4-19	24.3666
Pb4-19	24.1437
Pb4-19	24.147
EPb-19 ACTIN	6.6058
EPb-19 ACTIN	6.64763
EPb-19 ACTIN	6.42077
EPb-19	24.7323
EPb-19	24.6825
EPb-19	24.5141
Pb4-27 ACTIN	5.68053
Pb4-27 ACTIN	5.6829
Pb4-27 ACTIN	5.68842
Pb4-27	24.9327
Pb4-27	24.4316
Pb4-27	24.6822
EPb-27 ACTIN	5.5182
EPb-27 ACTIN	5.31567
EPb-27 ACTIN	5.71711
EPb-27	23.5594
EPb-27	23.146
EPb-27	22.9287

## Sheet: CCOAOMT1-qRT-PCR
Sample	Cq
Pb4-10 ACTIN	6.426
Pb4-10 ACTIN	6.35637
Pb4-10 ACTIN	6.31216
Pb4-10	20.0889
Pb4-10	20.253
Pb4-10	20.11
EPb-10 ACTIN	6.35012
EPb-10 ACTIN	6.30607
EPb-10 ACTIN	6.28933
EPb-10	20.2405
EPb-10	20.1995
EPb-10	20.5311
Pb4-14 ACTIN	5.98151
Pb4-14 ACTIN	5.96191
Pb4-14 ACTIN	5.9225
Pb4-14	19.0439
Pb4-14	19.0303
Pb4-14	19.3118
EPb-14 ACTIN	6.89318
EPb-14 ACTIN	6.76306
EPb-14 ACTIN	6.60233
EPb-14	19.7693
EPb-14	19.7693
EPb-14	19.7693
Pb4-19 ACTIN	6.3829
Pb4-19 ACTIN	6.22534
Pb4-19 ACTIN	6.24207
Pb4-19	20.6177
Pb4-19	20.6043
Pb4-19	21.0043
EPb-19 ACTIN	6.6058
EPb-19 ACTIN	6.64763
EPb-19 ACTIN	6.42077
EPb-19	20.9085
EPb-19	21.1136
EPb-19	21.1909
Pb4-27 ACTIN	5.68053
Pb4-27 ACTIN	5.6829
Pb4-27 ACTIN	5.68842
Pb4-27	21.4185
Pb4-27	21.4531
Pb4-27	21.5417
EPb-27 ACTIN	5.5182
EPb-27 ACTIN	5.31567
EPb-27 ACTIN	5.71711
EPb-27	22.0196
EPb-27	34.0929
EPb-27	21.5994

## Sheet: FLS-qRT-PCR
Sample	Cq
Pb4-10 ACTIN	6.426
Pb4-10 ACTIN	6.35637
Pb4-10 ACTIN	6.31216
Pb4-10	37.7317
Pb4-10	35.8061
Pb4-10	36.4041
EPb-10 ACTIN	6.35012
EPb-10 ACTIN	6.30607
EPb-10 ACTIN	6.28933
EPb-10	37.8266
EPb-10	36.0153
EPb-10	36.9292
Pb4-14 ACTIN	5.98151
Pb4-14 ACTIN	5.96191
Pb4-14 ACTIN	5.9225
Pb4-14	22.0234
Pb4-14	21.9816
Pb4-14	22.0441
EPb-14 ACTIN	6.89318
EPb-14 ACTIN	6.76306
EPb-14 ACTIN	6.60233
EPb-14	22.4044
EPb-14	22.3634
EPb-14	22.54
Pb4-19 ACTIN	6.3829
Pb4-19 ACTIN	6.22534
Pb4-19 ACTIN	6.24207
Pb4-19	22.7346
Pb4-19	22.7427
Pb4-19	22.5213
EPb-19 ACTIN	6.6058
EPb-19 ACTIN	6.64763
EPb-19 ACTIN	6.42077
EPb-19	22.306
EPb-19	22.9513
EPb-19	22.9179
Pb4-27 ACTIN	5.68053
Pb4-27 ACTIN	5.6829
Pb4-27 ACTIN	5.68842
Pb4-27	20.5699
Pb4-27	20.5815
Pb4-27	20.8226
EPb-27 ACTIN	5.5182
EPb-27 ACTIN	5.31567
EPb-27 ACTIN	5.71711
EPb-27	21.0411
EPb-27	20.6678
EPb-27	20.2944

## Sheet: ANS-qRT-PCR
Sample	Cq
Pb4-10 ACTIN	6.426
Pb4-10 ACTIN	6.35637
Pb4-10 ACTIN	6.31216
Pb4-10	34.7855
Pb4-10	34.9715
Pb4-10	35.3502
EPb-10 ACTIN	6.35012
EPb-10 ACTIN	6.30607
EPb-10 ACTIN	6.28933
EPb-10	35.6582
EPb-10	35.3623
EPb-10	35.1692
Pb4-14 ACTIN	5.98151
Pb4-14 ACTIN	5.96191
Pb4-14 ACTIN	5.9225
Pb4-14	33.6095
Pb4-14	34.0454
Pb4-14	33.6118
EPb-14 ACTIN	6.89318
EPb-14 ACTIN	6.76306
EPb-14 ACTIN	6.60233
EPb-14	33.7327
EPb-14	34.2033
EPb-14	33.5839
Pb4-19 ACTIN	6.3829
Pb4-19 ACTIN	6.22534
Pb4-19 ACTIN	6.24207
Pb4-19	36.0591
Pb4-19	35.4647
Pb4-19	35.7619
EPb-19 ACTIN	6.6058
EPb-19 ACTIN	6.64763
EPb-19 ACTIN	6.42077
EPb-19	37.1482
EPb-19	37.1531
EPb-19	37.1609
Pb4-27 ACTIN	5.68053
Pb4-27 ACTIN	5.6829
Pb4-27 ACTIN	5.68842
Pb4-27	38.4402
Pb4-27	41.0836
Pb4-27	38.5995
EPb-27 ACTIN	5.5182
EPb-27 ACTIN	5.31567
EPb-27 ACTIN	5.71711
EPb-27	38.3143
EPb-27	38.8214
EPb-27	38.9214
