# Supplementary material for: Effects of Exogenous Ergothioneine on Brassica rapa Clubroot Development Revealed by Transcriptomic Analysis
Source: Int J Mol Sci. 2023 Mar 28;24(7):6380. doi: 10.3390/ijms24076380 (PMC10094275; doi:10.3390/ijms24076380)
Supplement: Supplementary file 1 [file ijms-24-06380-s001.zip › Table S6 Primer sequence.xlsx]

## Sheet: Sheet1
Table S6. Primer sequence
Gene ID	Forward primer	Reverse primer
Bra005221 (PAL)	TGTGAAGGCGAGCAGTGATT	AGCTCCTTCTGAAGTGCGAC
Bra021637 (C4H)	AGGCAAAGGACAGGACATGG	AATCCCTTTCGTGGCGGAAT
Bra030429 (4CL)	ACTCGGTCAGGGATACGGAA	TAACCACCGTACCACAAGCC
Bra034600 (CCOAOMT1)	CTCCCCGAAGACGGCAAAAT	AGTCGATCTTGTGGGCAACG
Bra018076 (FLS)	CGGCGGTTGAAAGAACTTGG	GATTCTTGACGGTGGCCAGA
Bra034861 (ANS)	GGAAGCAGATTGGGTGTGGA	CCGTACTCGTCCACCACTTC
